# Supplementary material for: Diastereoselective allylation-based asymmetric total synthesis of 1,10-seco-guaianolides
Source: Royal Society of Chemistry journal article supplement (doi:10.1039/d3ob02013d), 2023-12-19
Supplement: d3ob02013d1.pdf [file d3ob02013d1.pdf]

## Supporting Information

### Diastereoselective allylation-based asymmetric total synthesis of 1,10-*seco*-guaianolides

Rodney A. Fernandes,\* and Ravikant S. Ranjan

Department of Chemistry, Indian Institute of Technology Bombay, Powai, Mumbai 400076,  
Maharashtra, India

Email: [rfernand@chem.iitb.ac.in](mailto:rfernand@chem.iitb.ac.in)

| Table of Contents                                                       | Page    |
|-------------------------------------------------------------------------|---------|
| 1 <sup>1</sup> H, <sup>13</sup> C NMR and HRMS spectra of all compounds | S2-S93  |
| 2 X-ray data of <b>7h</b> , <b>8a</b> and <b>12</b>                     | S94-S99 |

$^1\text{H}$  NMR (400 MHz,  $\text{CDCl}_3$ ) and  $^{13}\text{C}\{^1\text{H}\}$  NMR (100 MHz,  $\text{CDCl}_3$ ) of compound **3b**

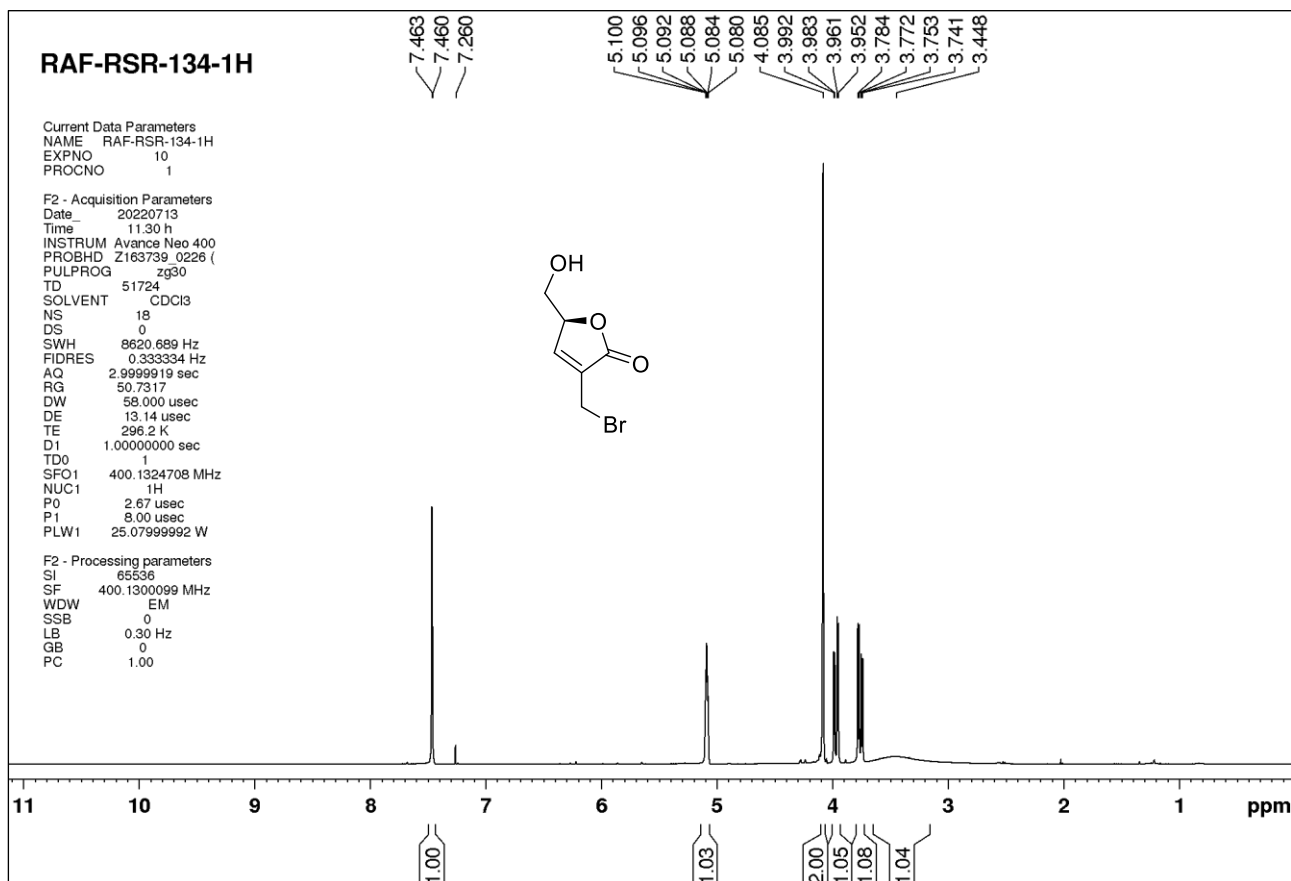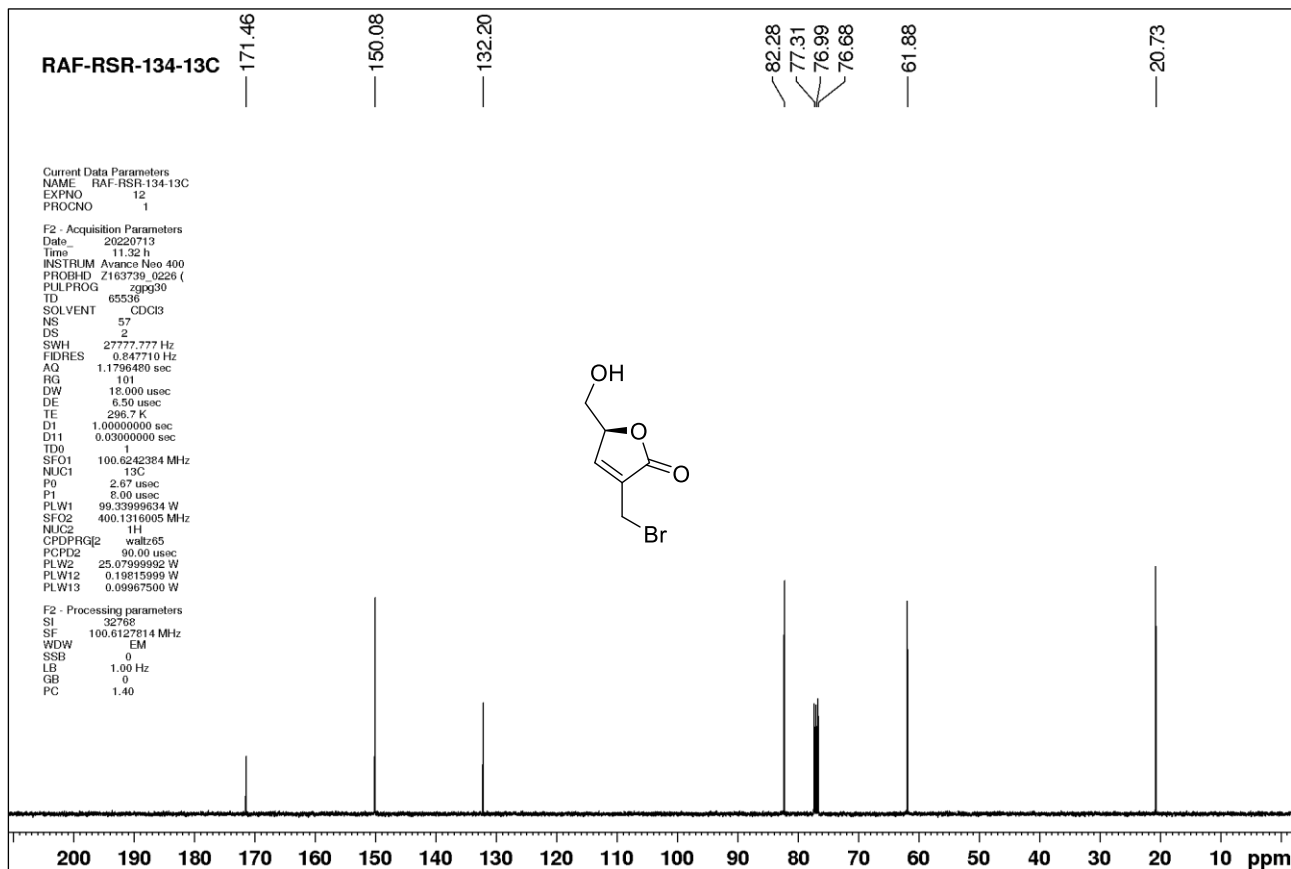

**3b**: HRMS (Q-TOF)  $m/z$ :  $[M + H]^+$  Calcd for  $C_6H_8O_3Br$  206.9648; Found: 206.9648.

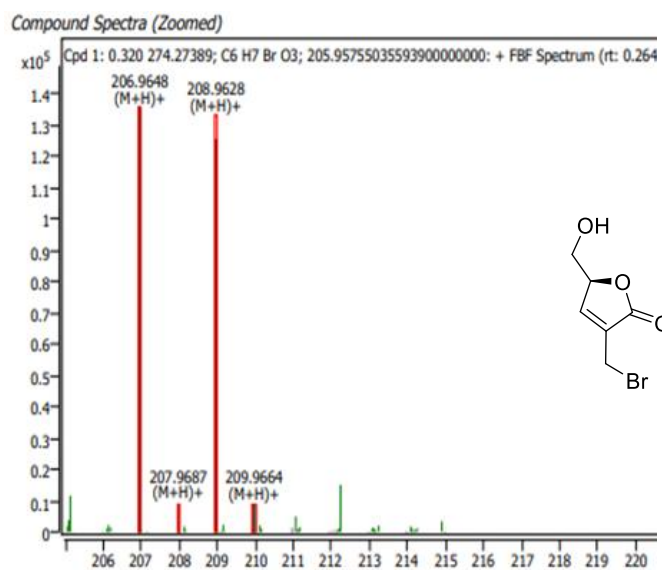

$^1\text{H}$  NMR (400 MHz,  $\text{CDCl}_3$ ) and  $^{13}\text{C}\{^1\text{H}\}$  NMR (100 MHz,  $\text{CDCl}_3$ ) of compound **7a**

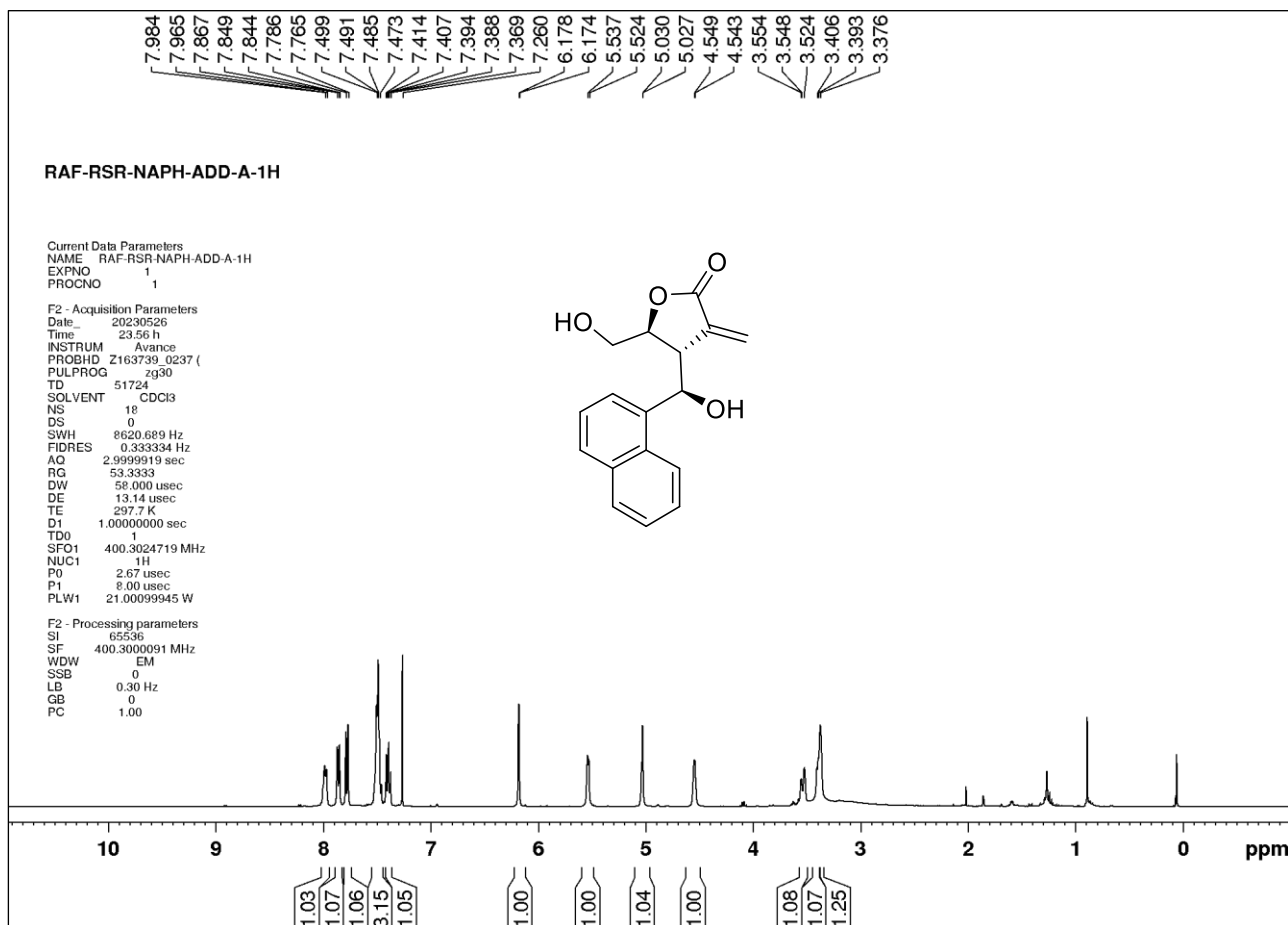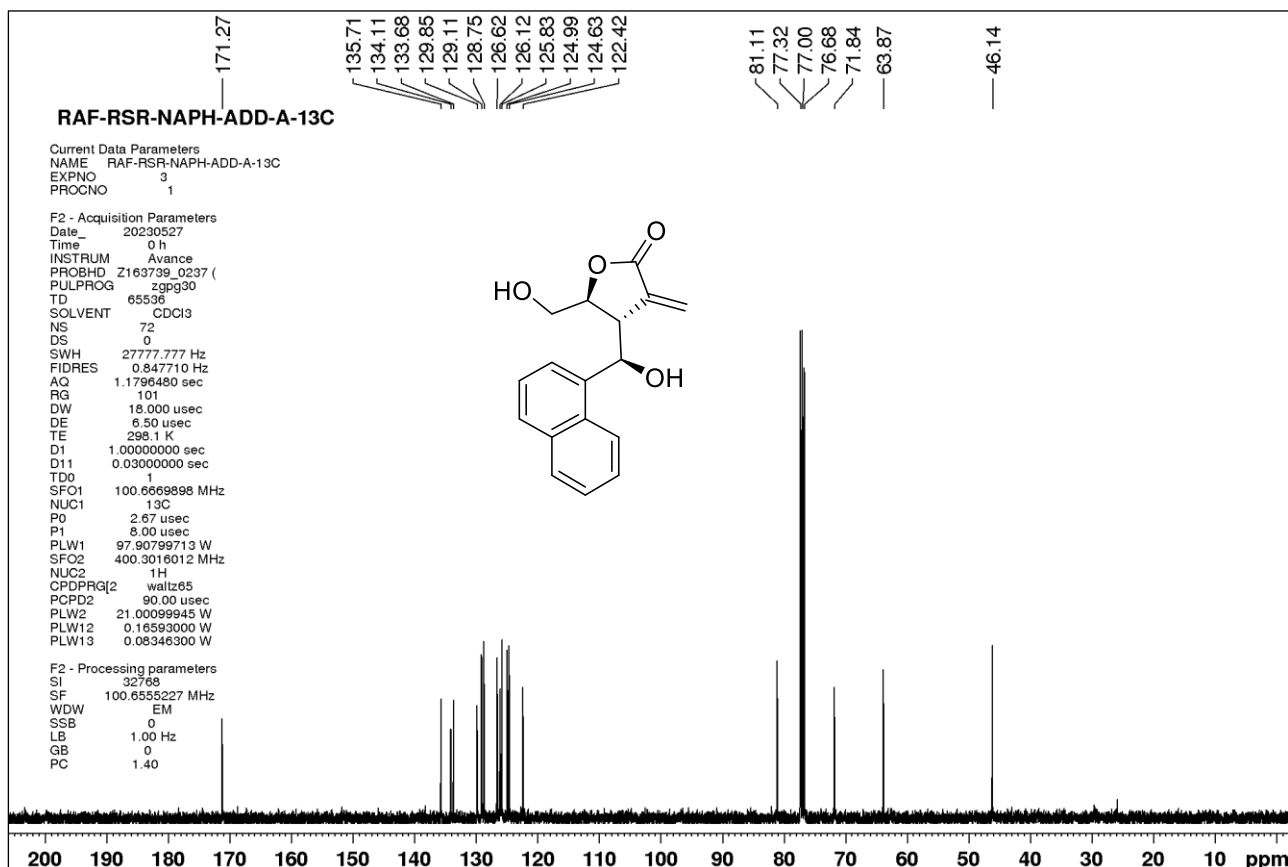

**7a:** HRMS (ESI-TOF)  $m/z$ :  $[M + Na]^+$  Calcd for  $C_{17}H_{16}O_4Na$  307.0941; Found: 307.0947.

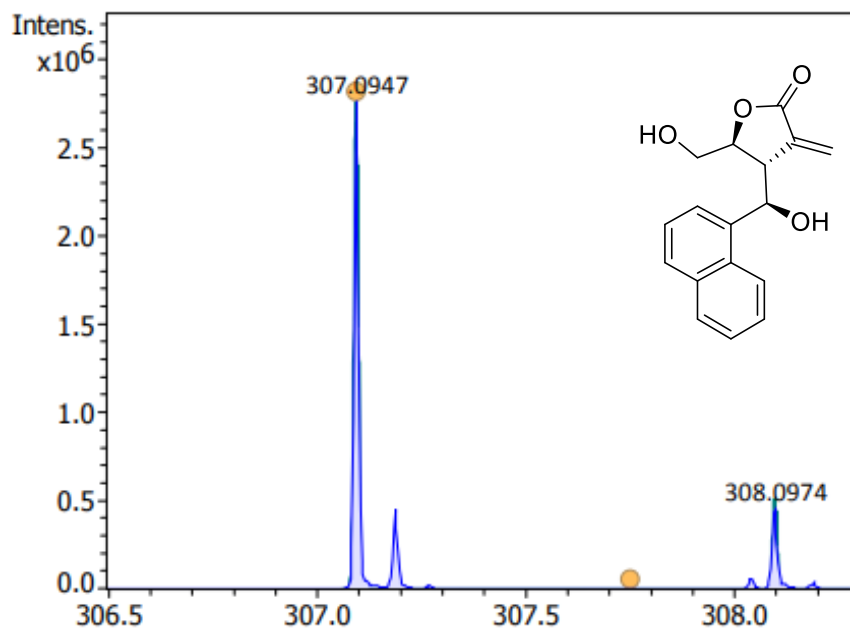

$^1\text{H}$  NMR (400 MHz, MeOH- $d_4$ ) and  $^{13}\text{C}\{^1\text{H}\}$  NMR (100 MHz, MeOH- $d_4$ ) of compound **7b**

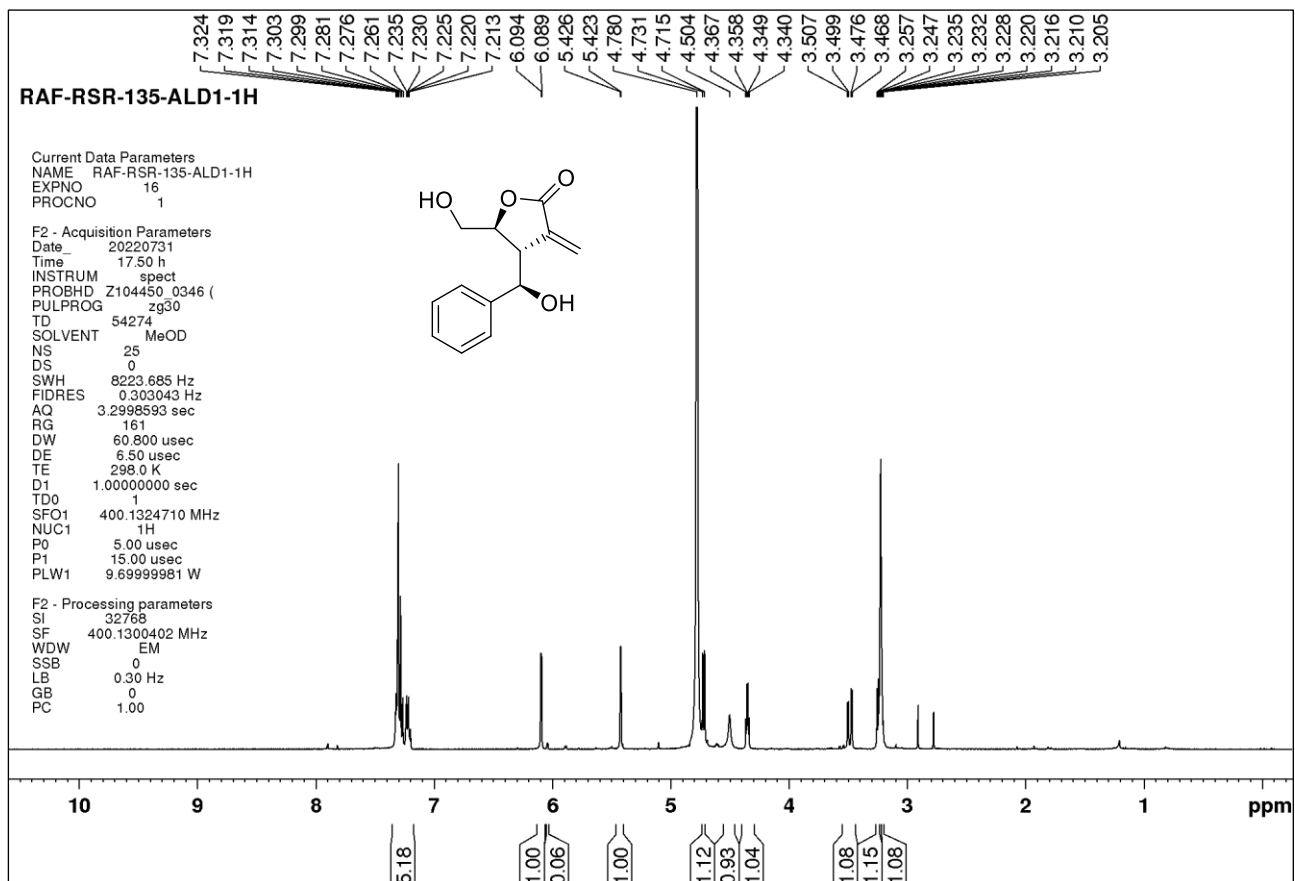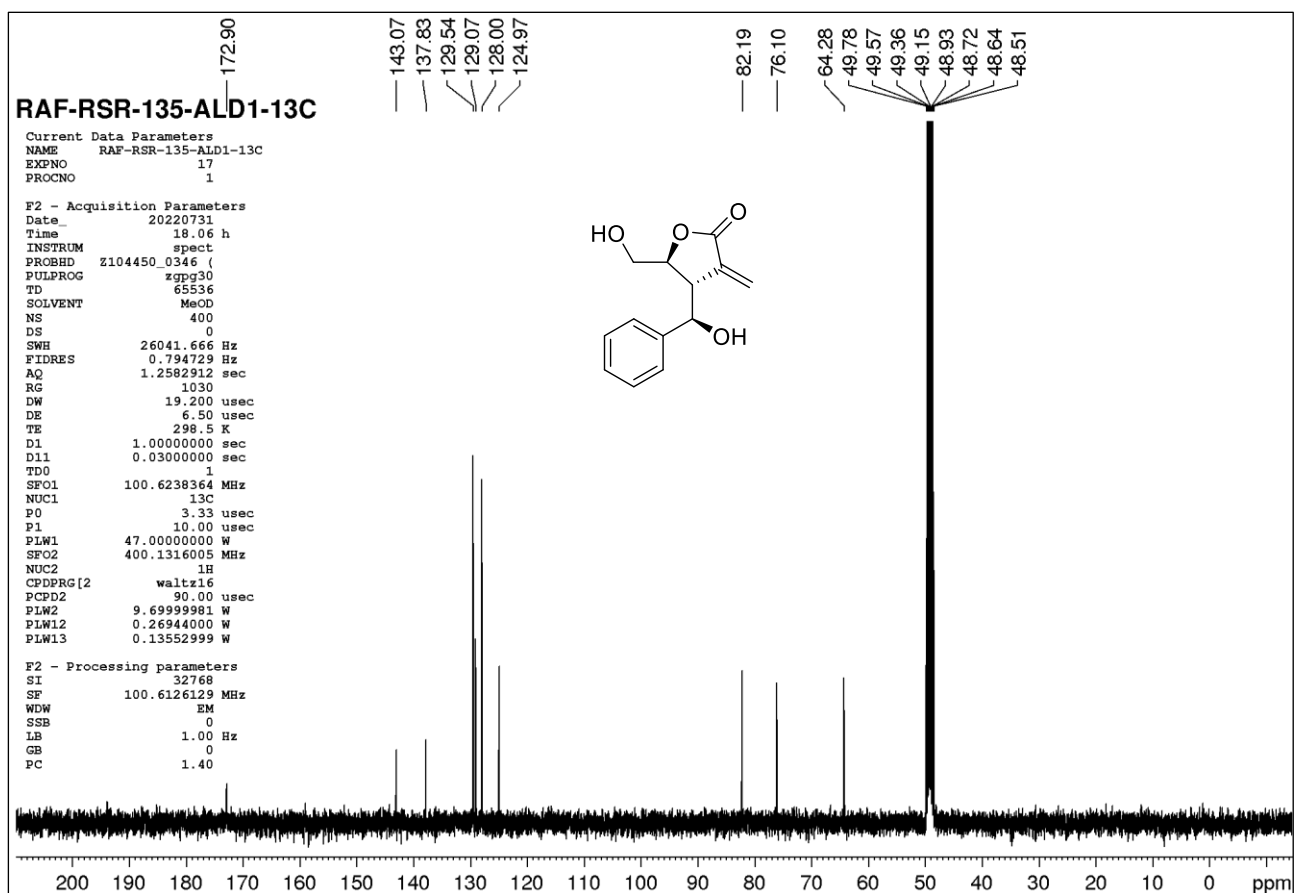

**7b:** HRMS (ESI-TOF)  $m/z$ :  $[M + H]^+$  Calcd for  $C_{13}H_{15}O_4$  235.0966; Found: 235.0962.

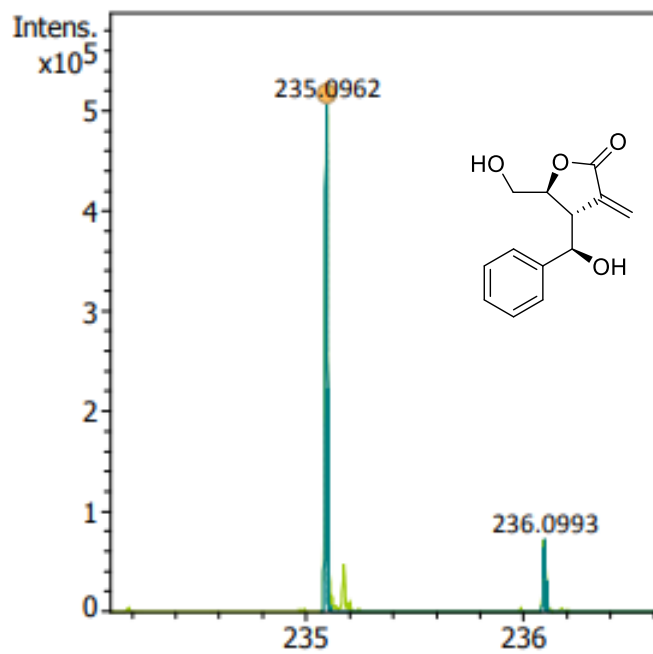

$^1\text{H}$  NMR (400 MHz,  $\text{CDCl}_3$ ) and  $^{13}\text{C}\{^1\text{H}\}$  NMR (100 MHz,  $\text{CDCl}_3$ ) of compound **7c**

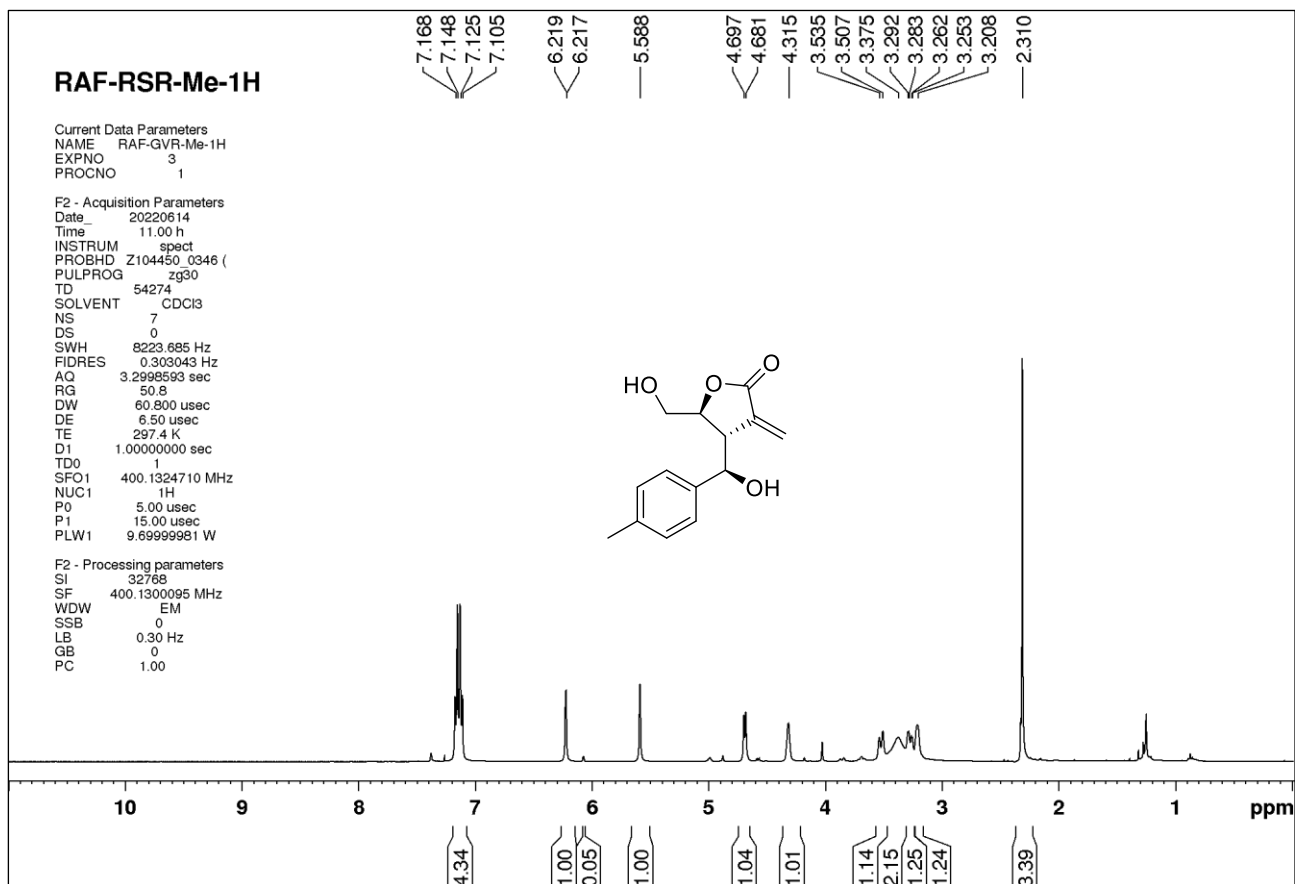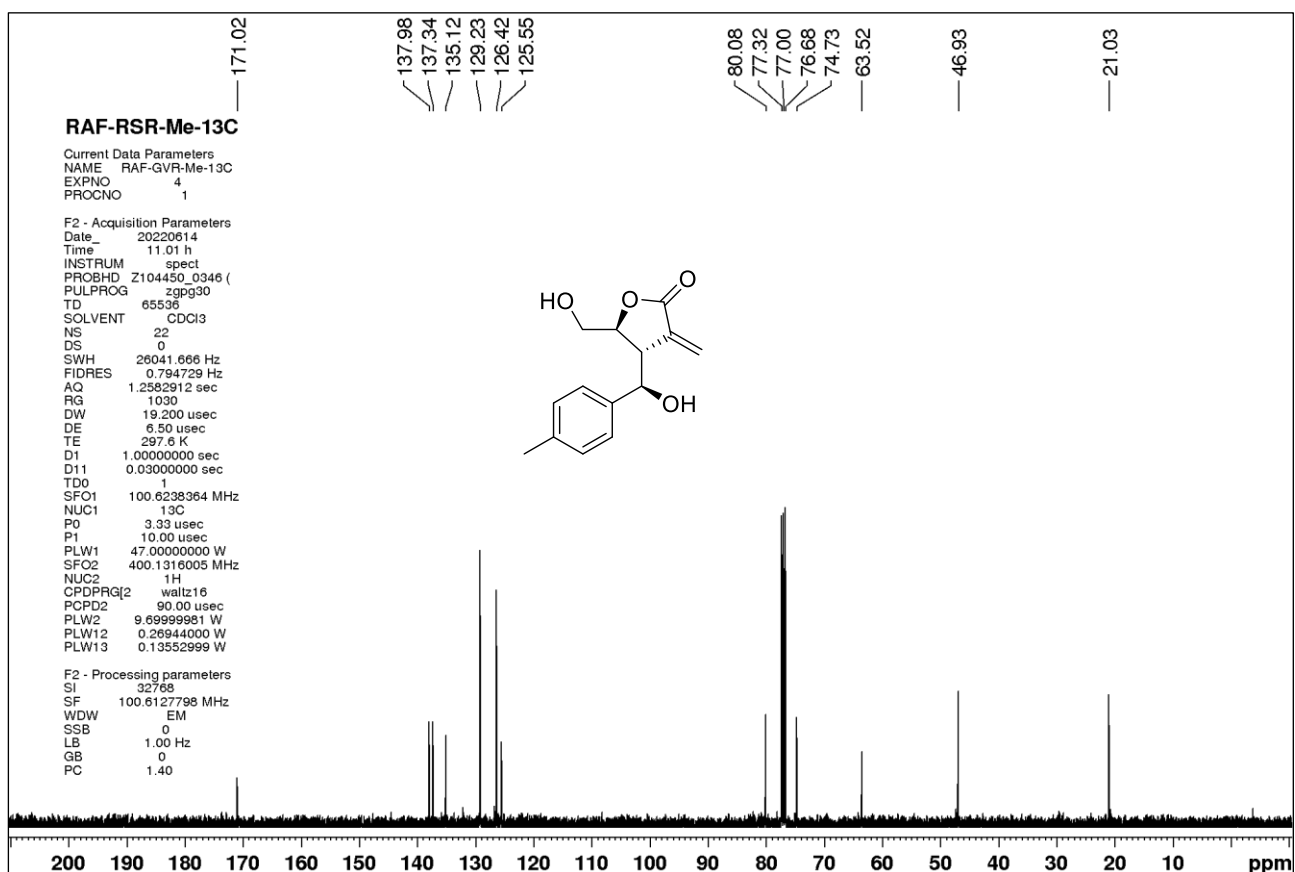



7c: HRMS (Q-TOF)  $m/z$ :  $[M + H]^+$  Calcd for  $C_{14}H_{17}O_4$  249.1127; Found: 249.1127.

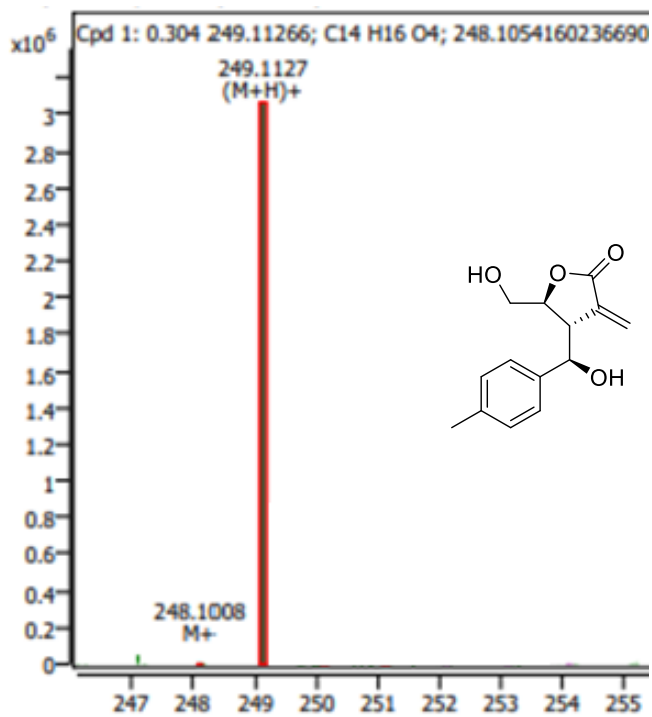

$^1\text{H}$  NMR (400 MHz,  $\text{CDCl}_3$ ) and  $^{13}\text{C}$ { $^1\text{H}$ } NMR (100 MHz,  $\text{CDCl}_3$ ) of compound **7d**

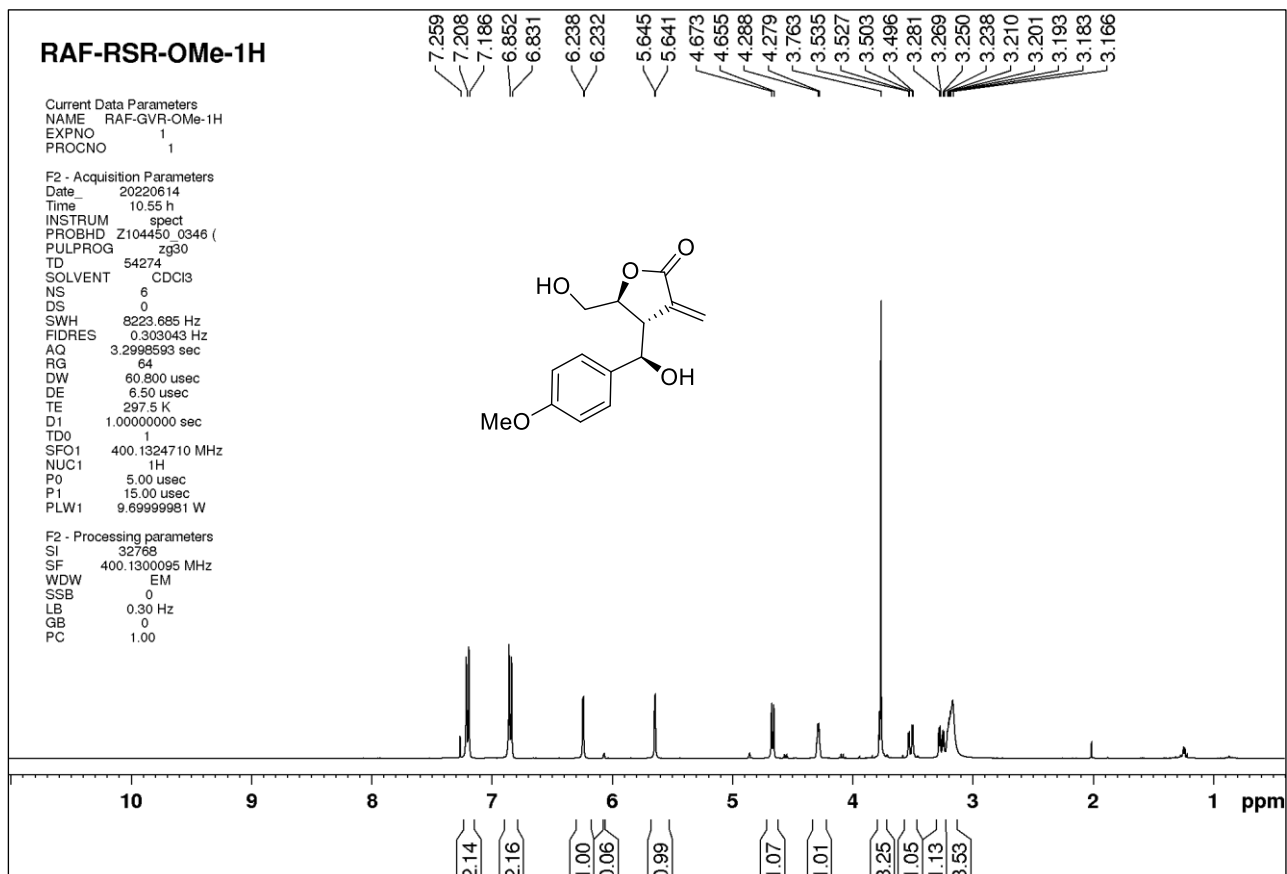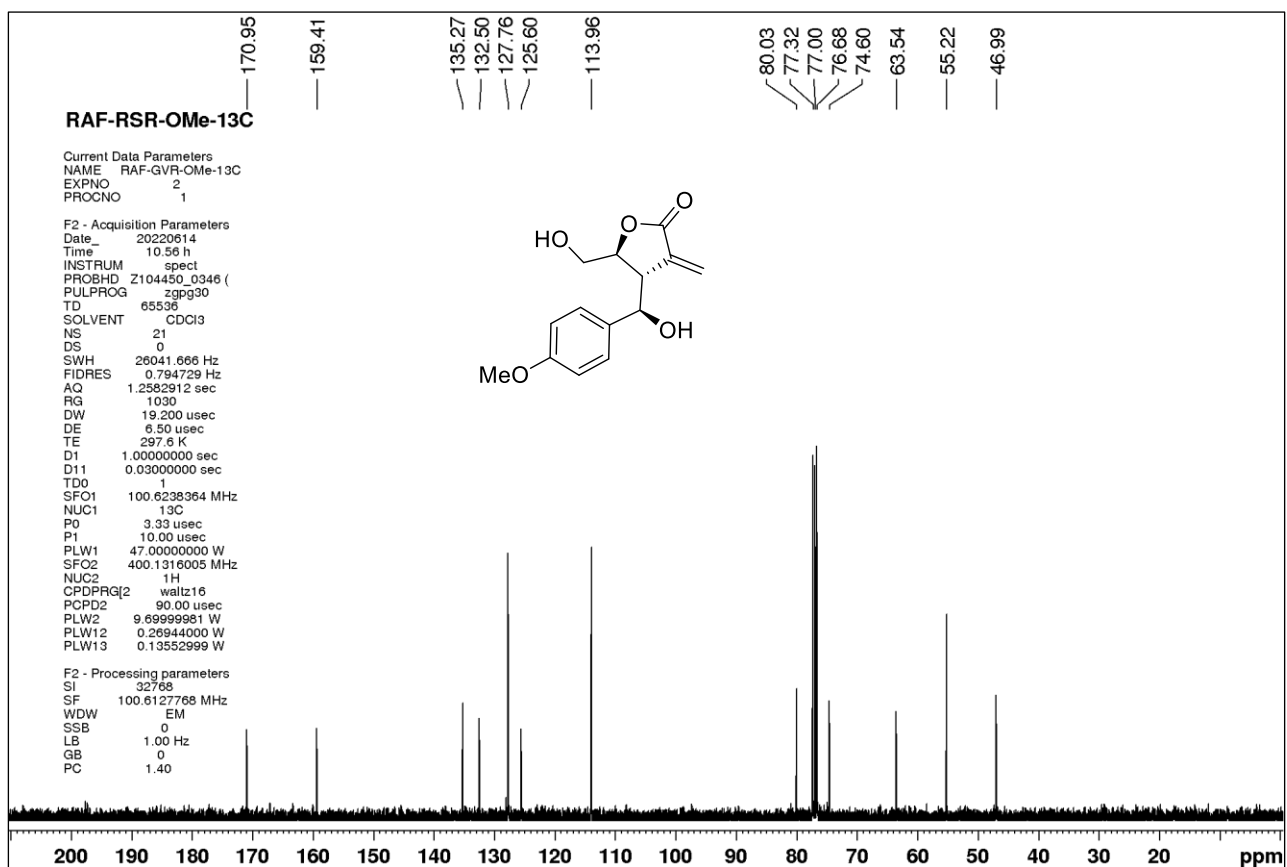

**7d:** HRMS (ESI-TOF)  $m/z$ :  $[M + Na]^+$  Calcd for  $C_{14}H_{16}O_5Na$  287.0890; Found 287.0899.

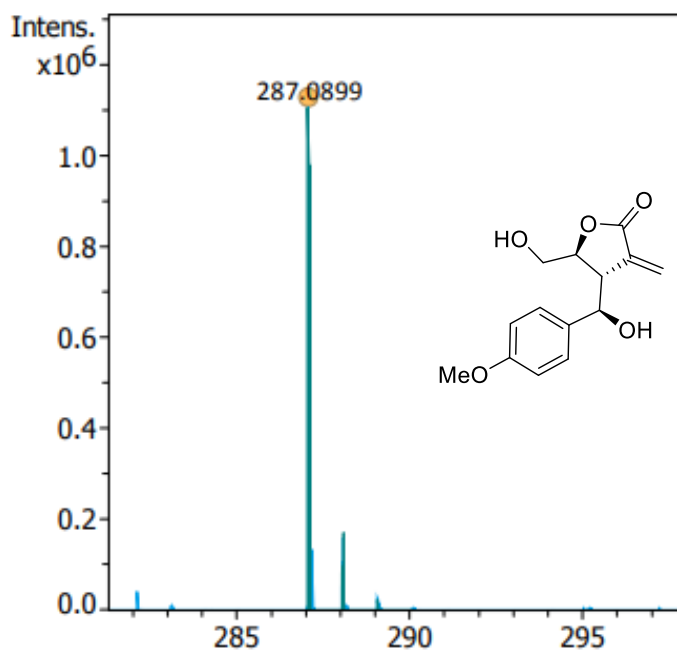

$^1\text{H}$  NMR (500 MHz,  $\text{CDCl}_3$ ) and  $^{13}\text{C}\{^1\text{H}\}$  NMR (125 MHz,  $\text{CDCl}_3$ ) of compound **7e**

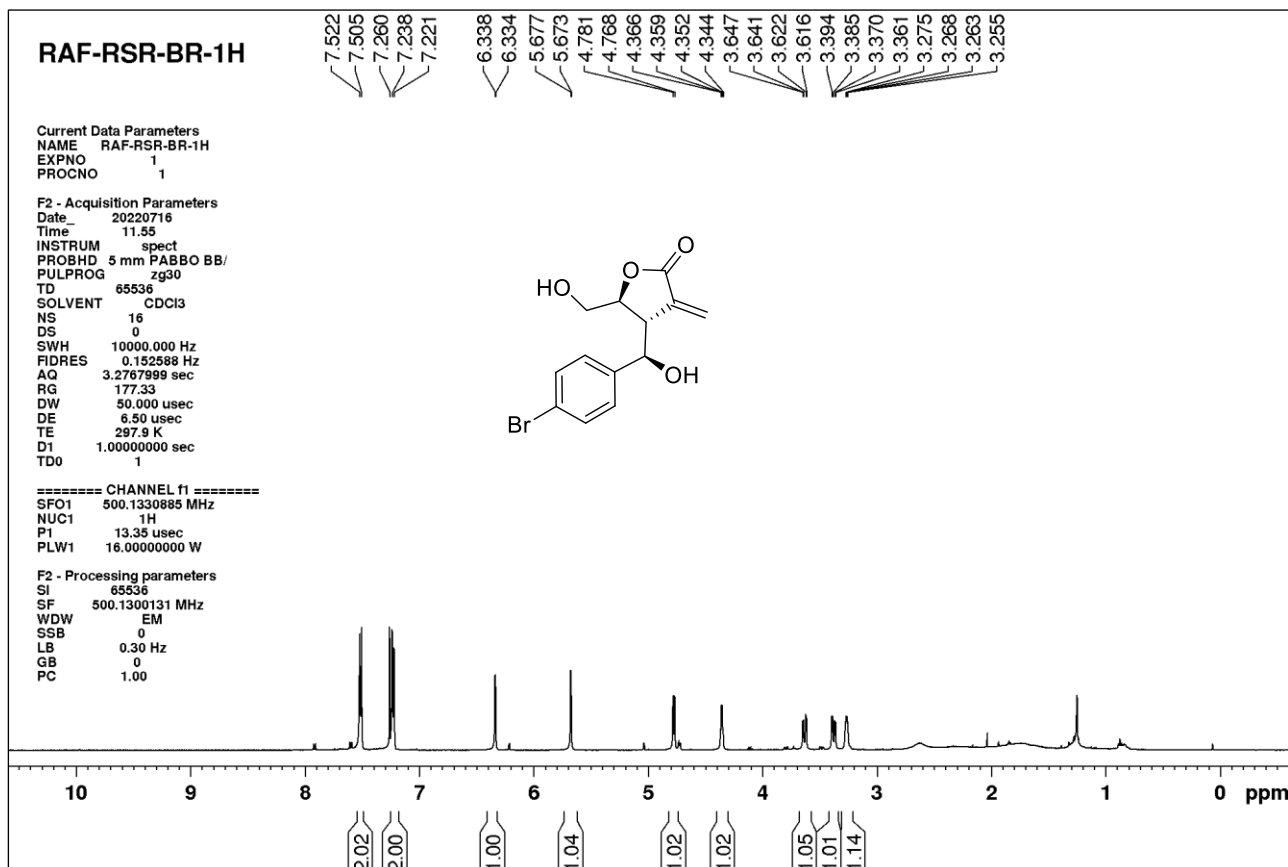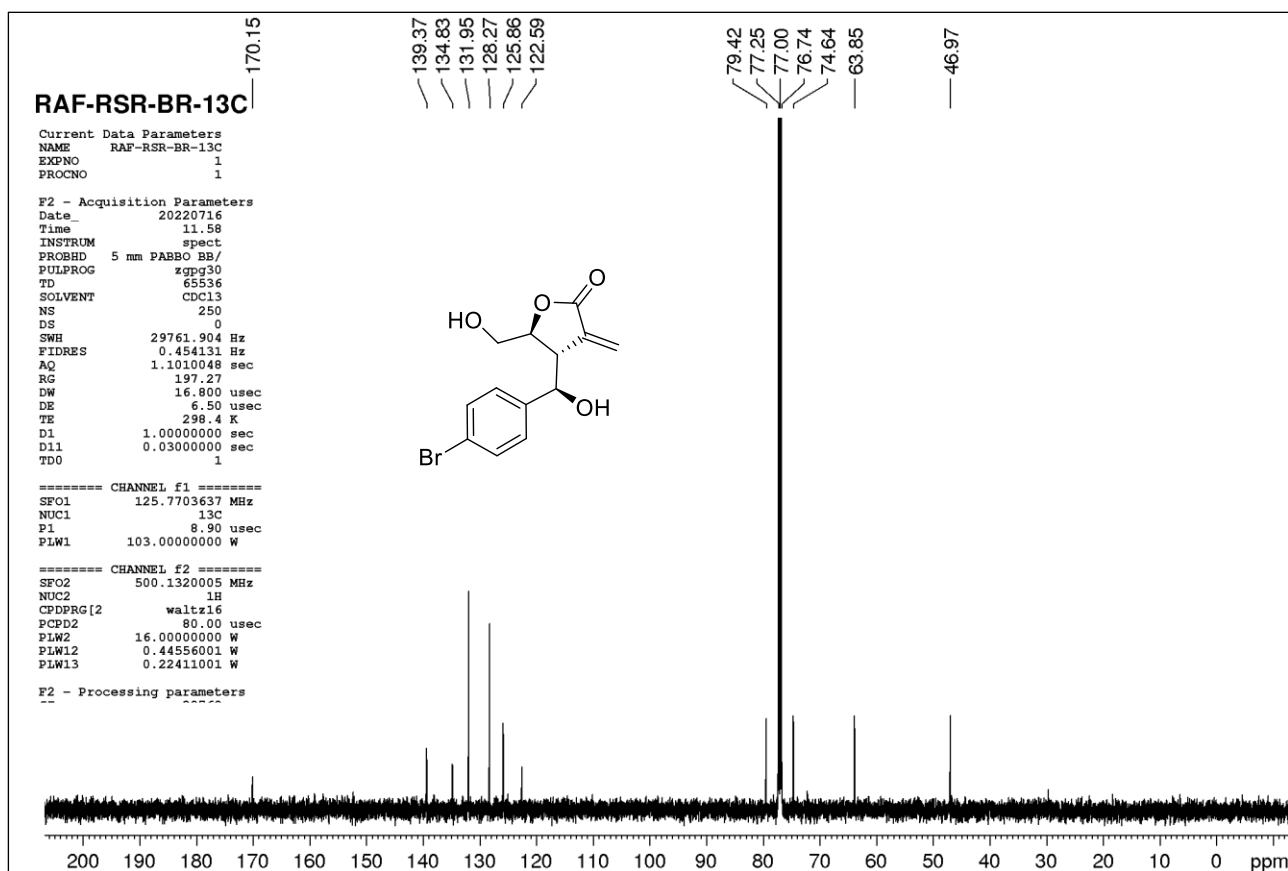

7e: HRMS (ESI-TOF)  $m/z$ :  $[M + Na]^+$  Calcd for  $C_{13}H_{13}O_4BrNa$  334.9889; Found 334.9882.

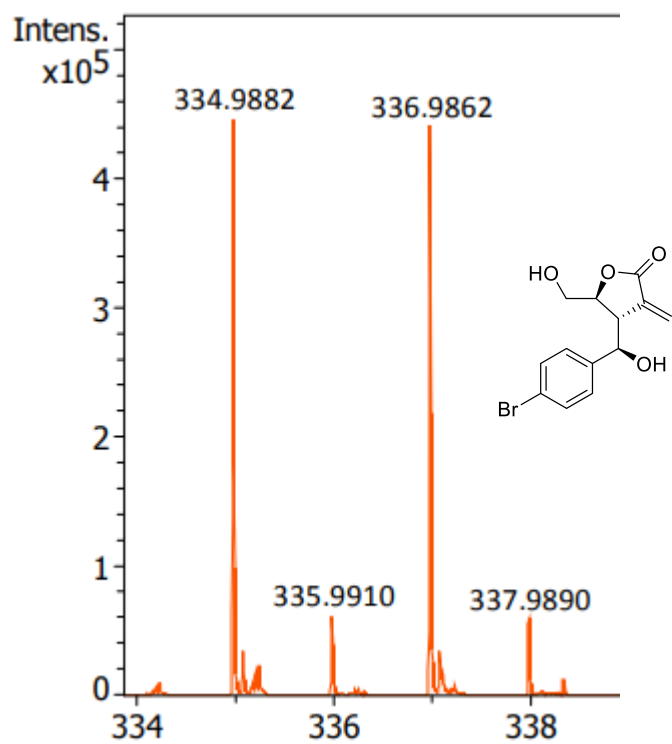

$^1\text{H}$  NMR (500 MHz,  $\text{CDCl}_3$ ) and  $^{13}\text{C}\{^1\text{H}\}$  NMR (125 MHz,  $\text{CDCl}_3$ ) of compound **7f**

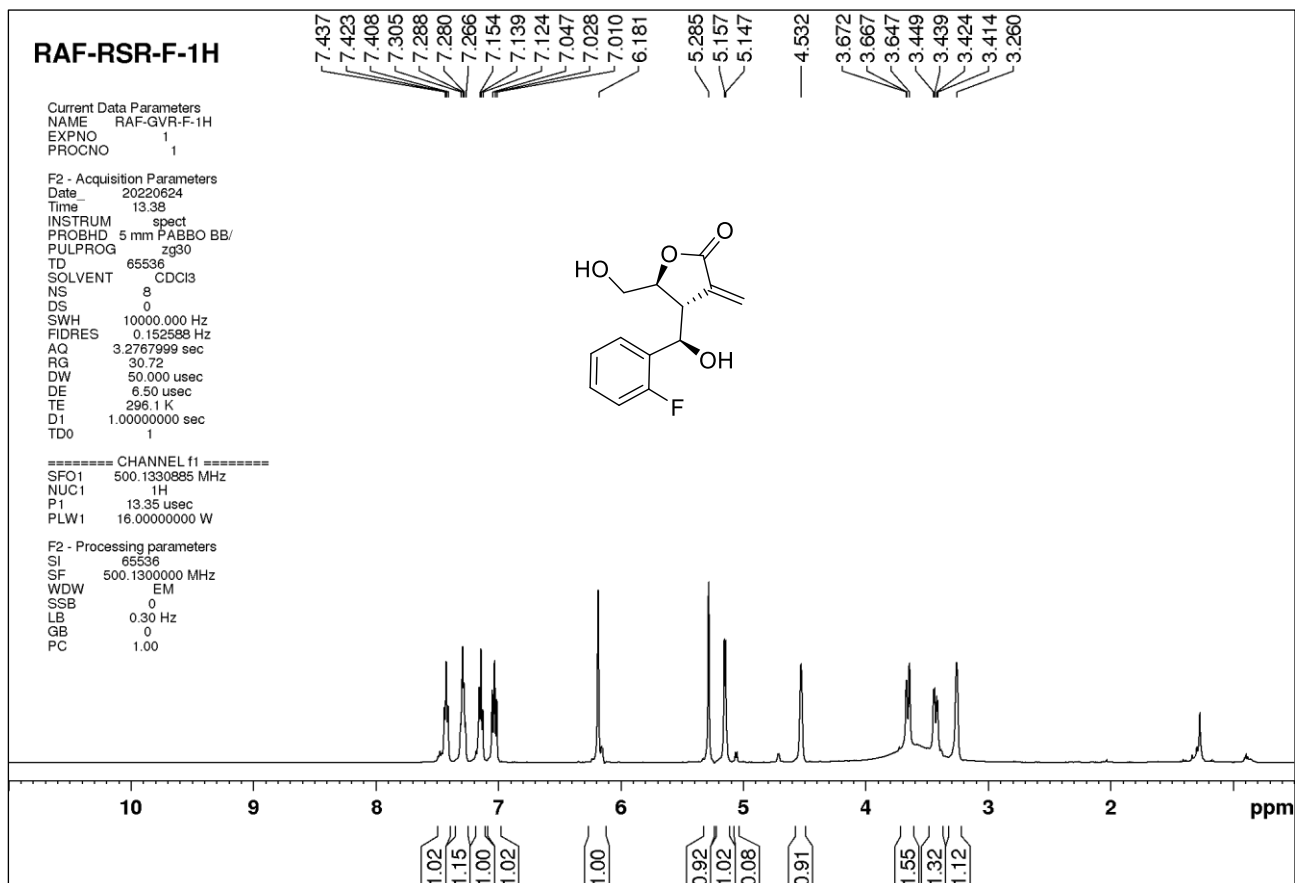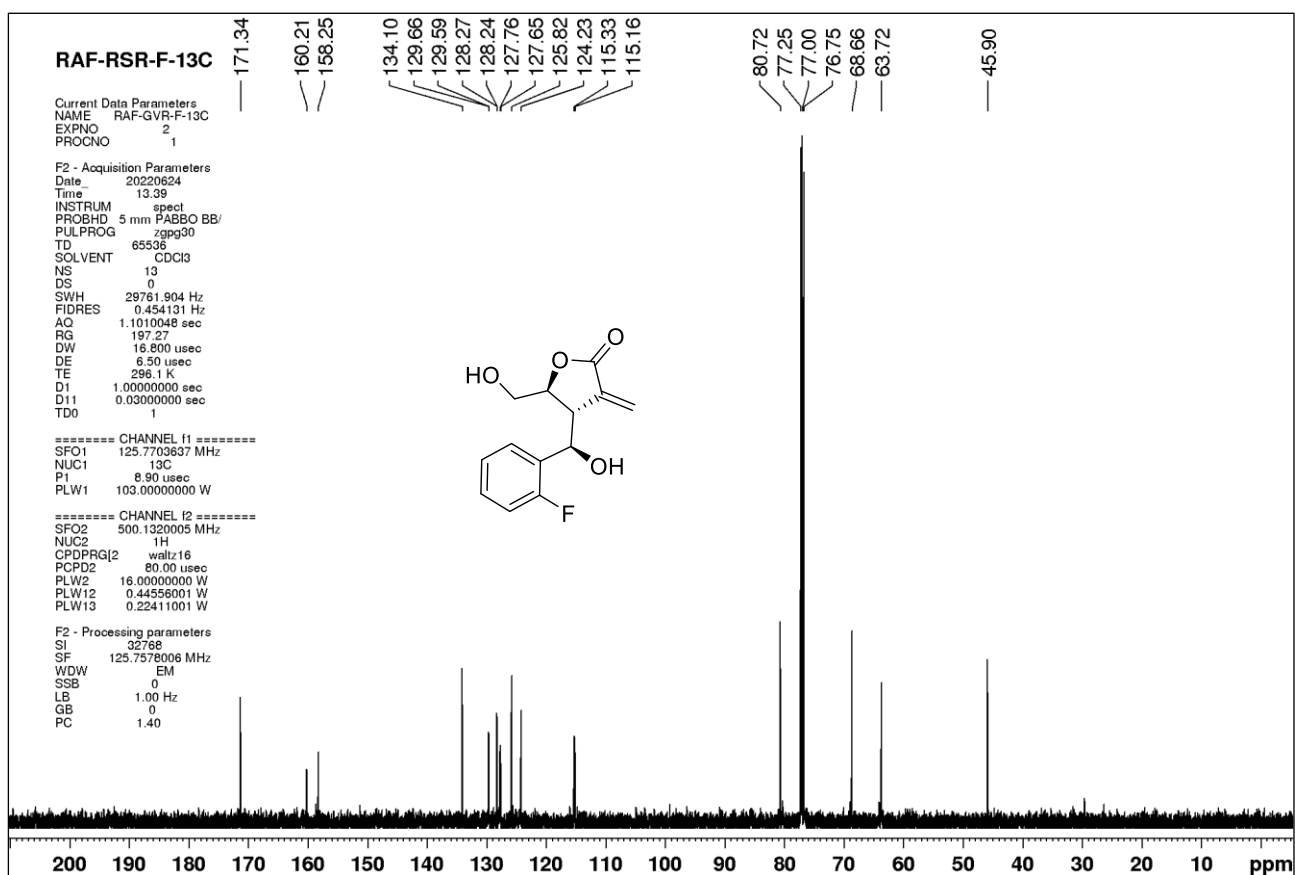

$^{19}\text{F}\{^1\text{H}\}$  NMR (376 MHz,  $\text{CDCl}_3$ ) of compound **7f**

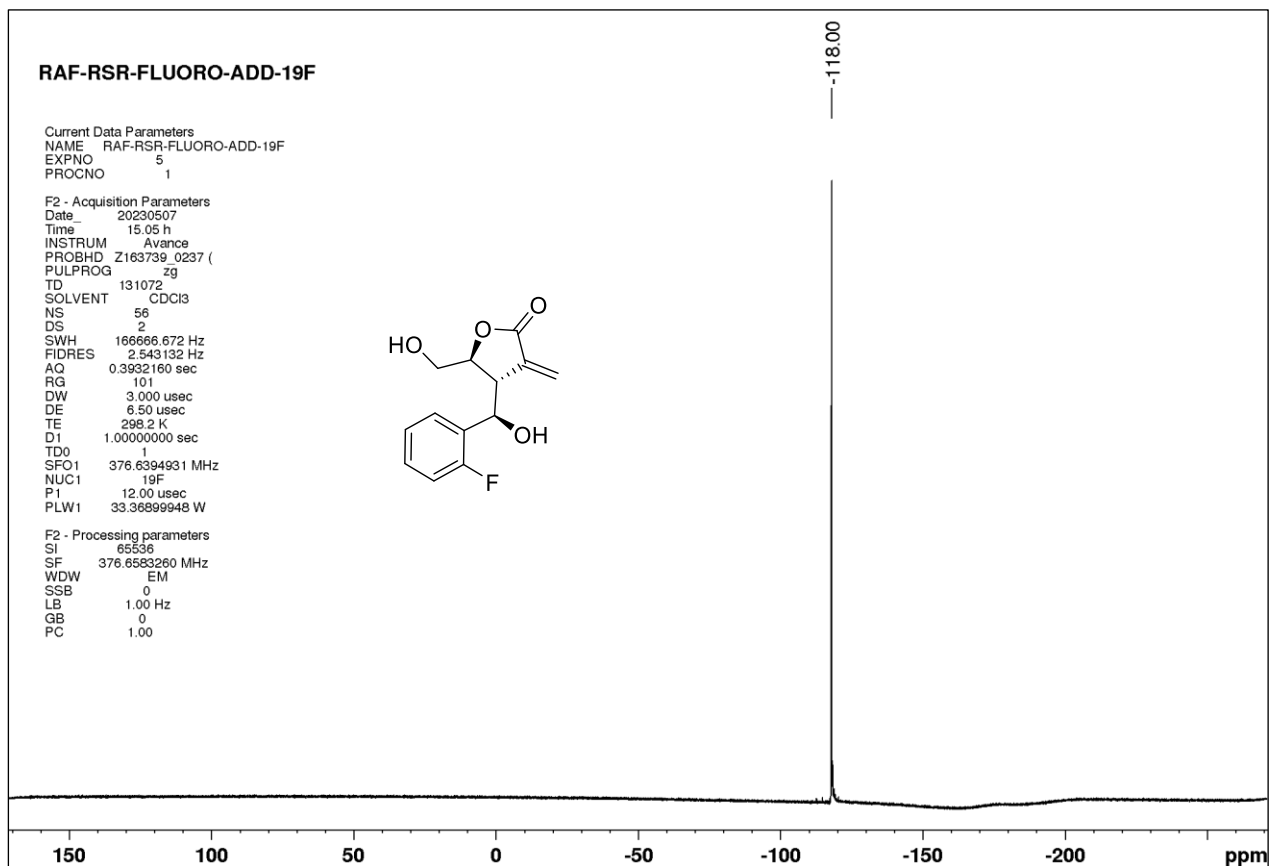

**7f**: HRMS (ESI-TOF)  $m/z$ :  $[\text{M} + \text{H}]^+$  Calcd for  $\text{C}_{13}\text{H}_{14}\text{O}_4\text{F}$  253.0871; Found 253.0864.

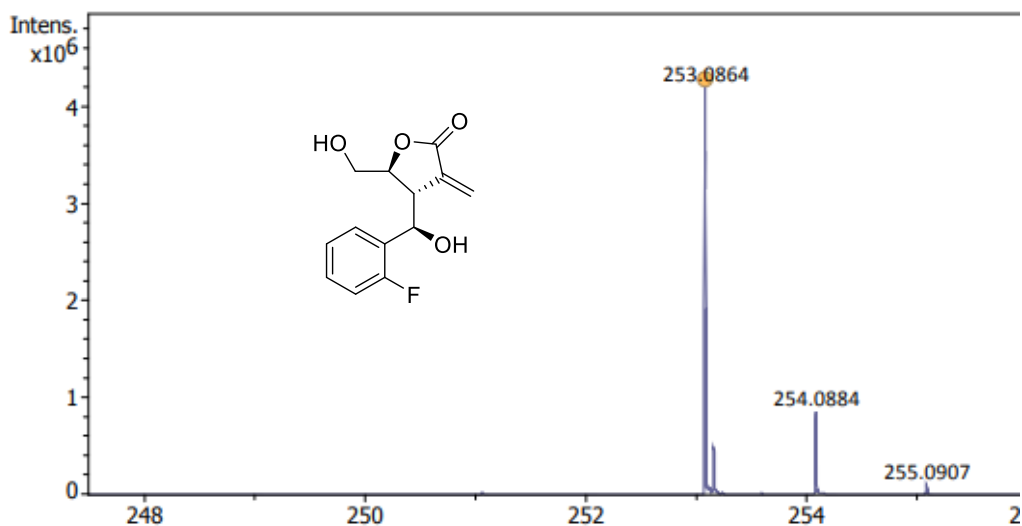

$^1\text{H}$  NMR (400 MHz,  $\text{CDCl}_3$ ) and  $^{13}\text{C}\{^1\text{H}\}$  NMR (100 MHz,  $\text{CDCl}_3$ ) of compound **7g**

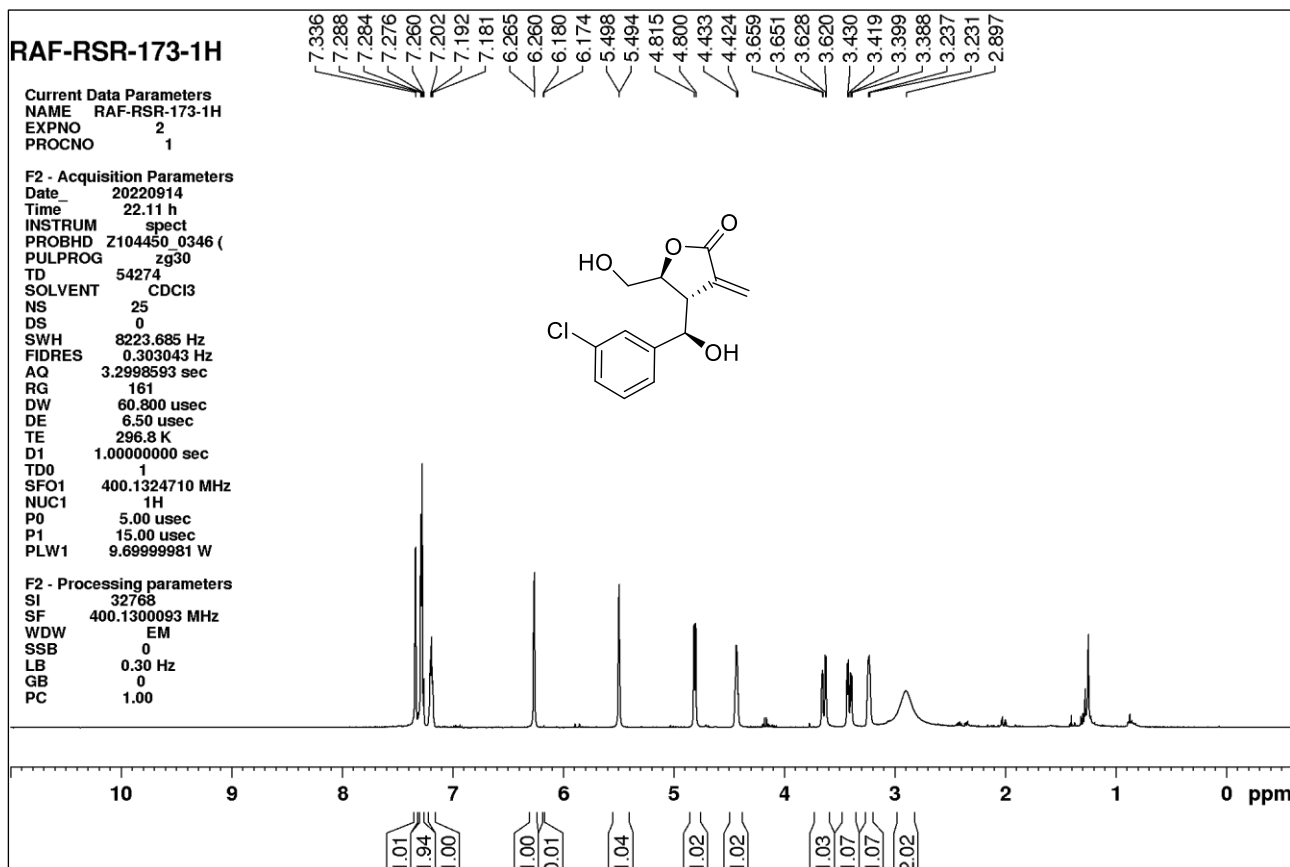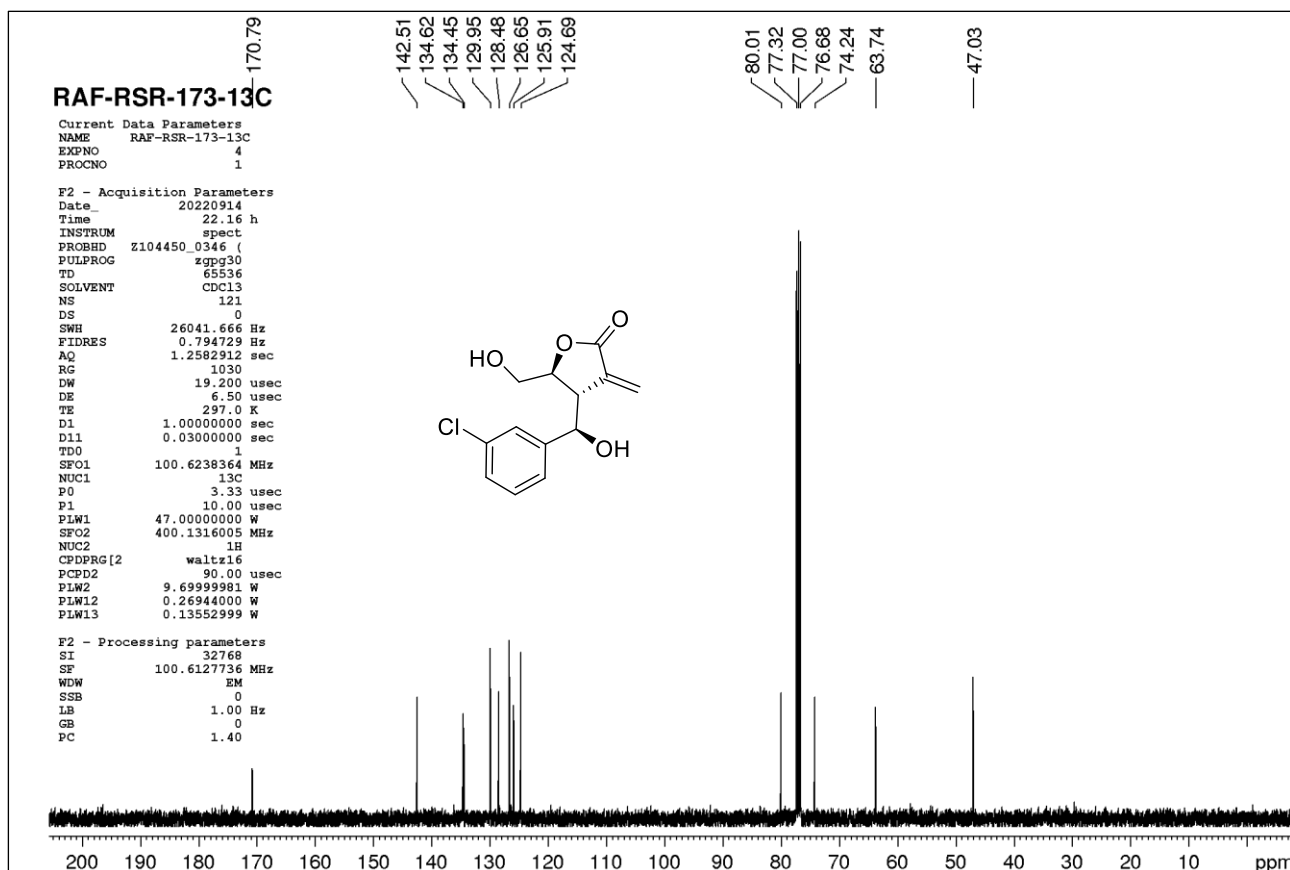



**7g:** HRMS (ESI-TOF)  $m/z$ :  $[M + H]^+$  Calcd for  $C_{13}H_{14}ClO_4$  269.0580; Found 269.0582.

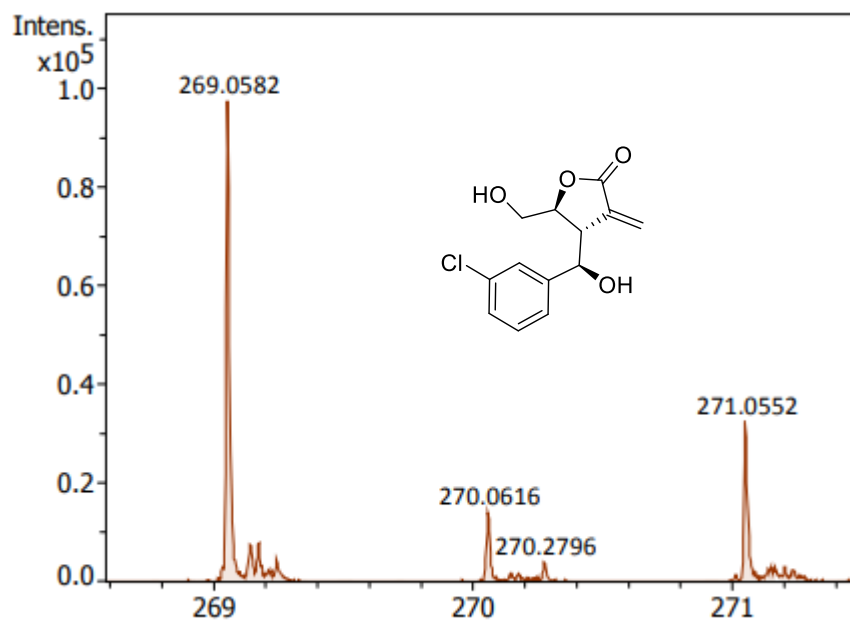

$^1\text{H}$  NMR (400 MHz,  $\text{CDCl}_3$ ) and  $^{13}\text{C}\{^1\text{H}\}$  NMR (100 MHz,  $\text{CDCl}_3$ ) of compound **7h**

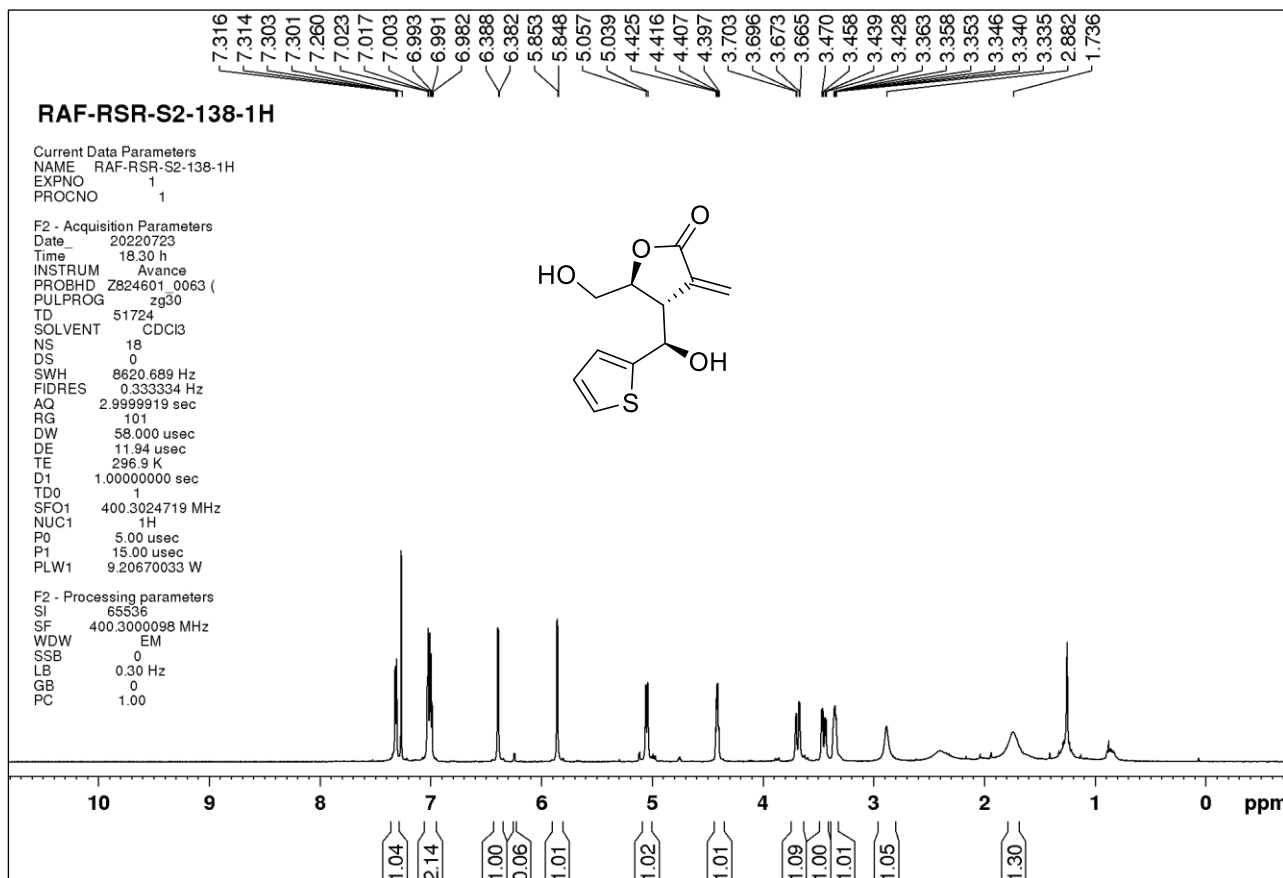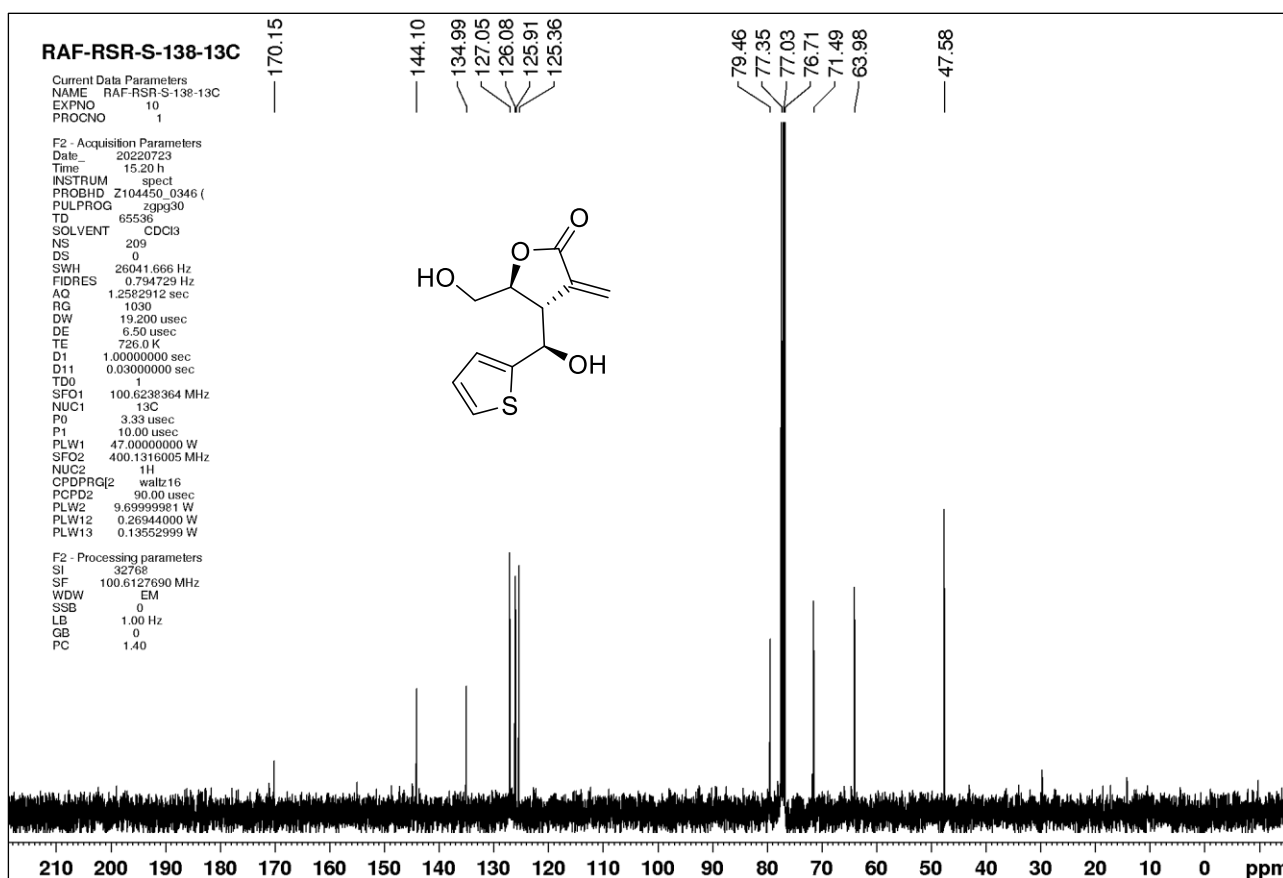

**7h:** HRMS (ESI-TOF)  $m/z$ :  $[M + Na]^+$  Calcd for  $C_{11}H_{12}O_4SNa$  263.0349; Found 263.0349.

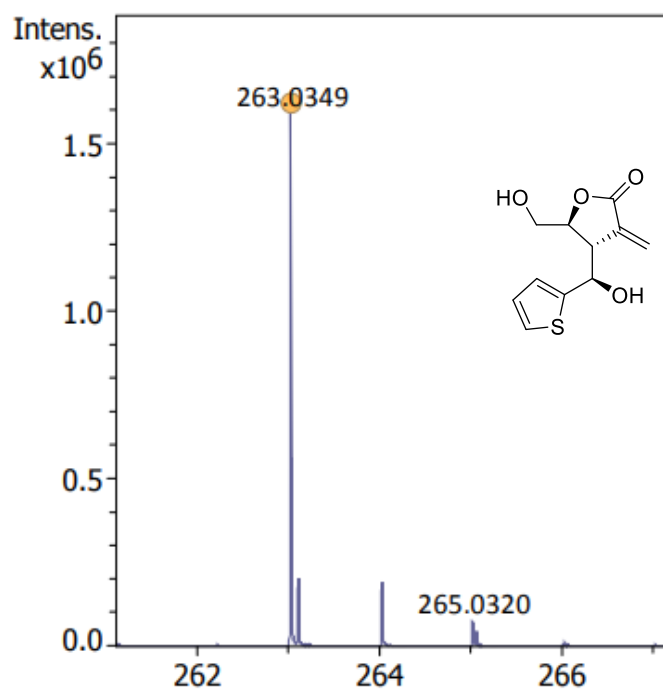

<sup>1</sup>H NMR (400 MHz, MeOH-d<sub>4</sub>) and <sup>13</sup>C{<sup>1</sup>H} NMR (100 MHz, MeOH-d<sub>4</sub>) of compound **7i**

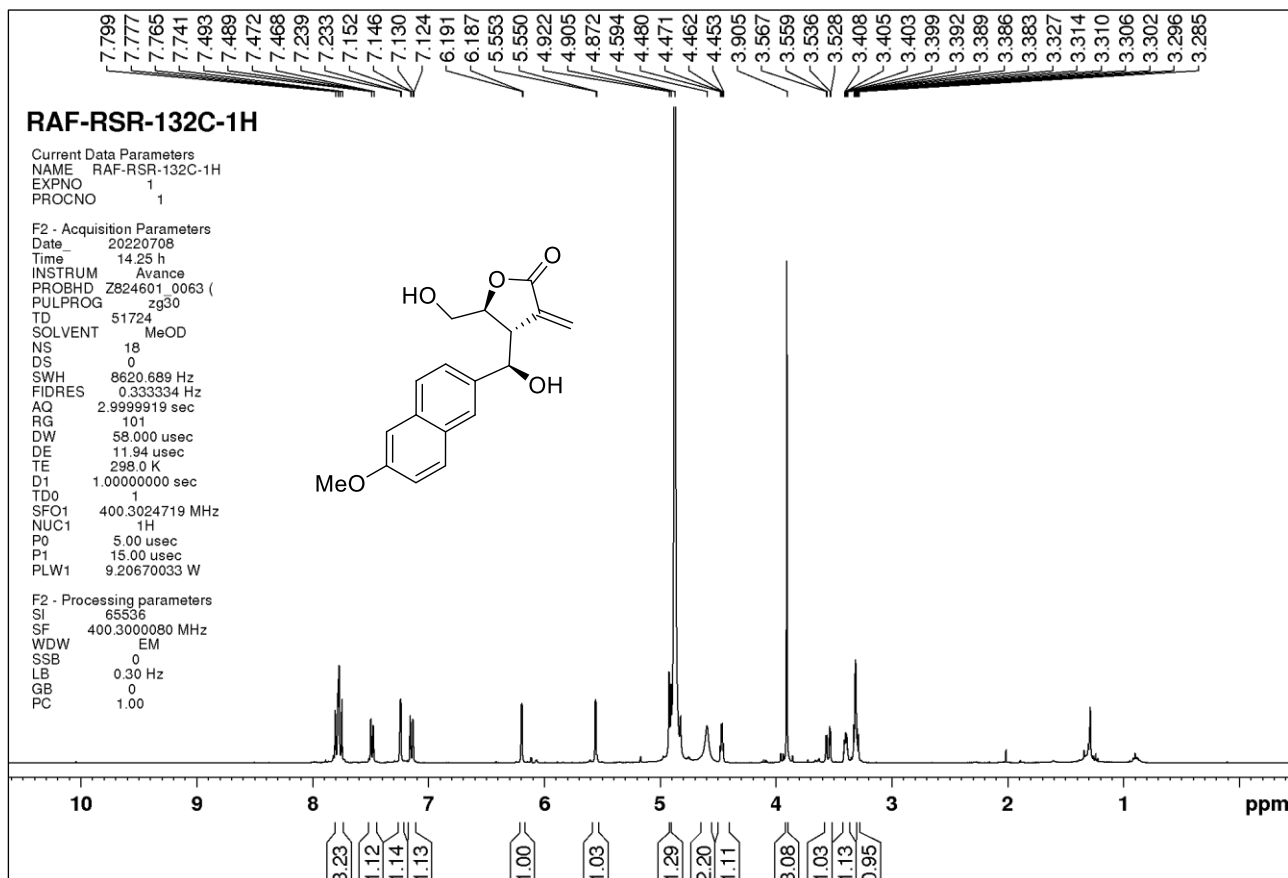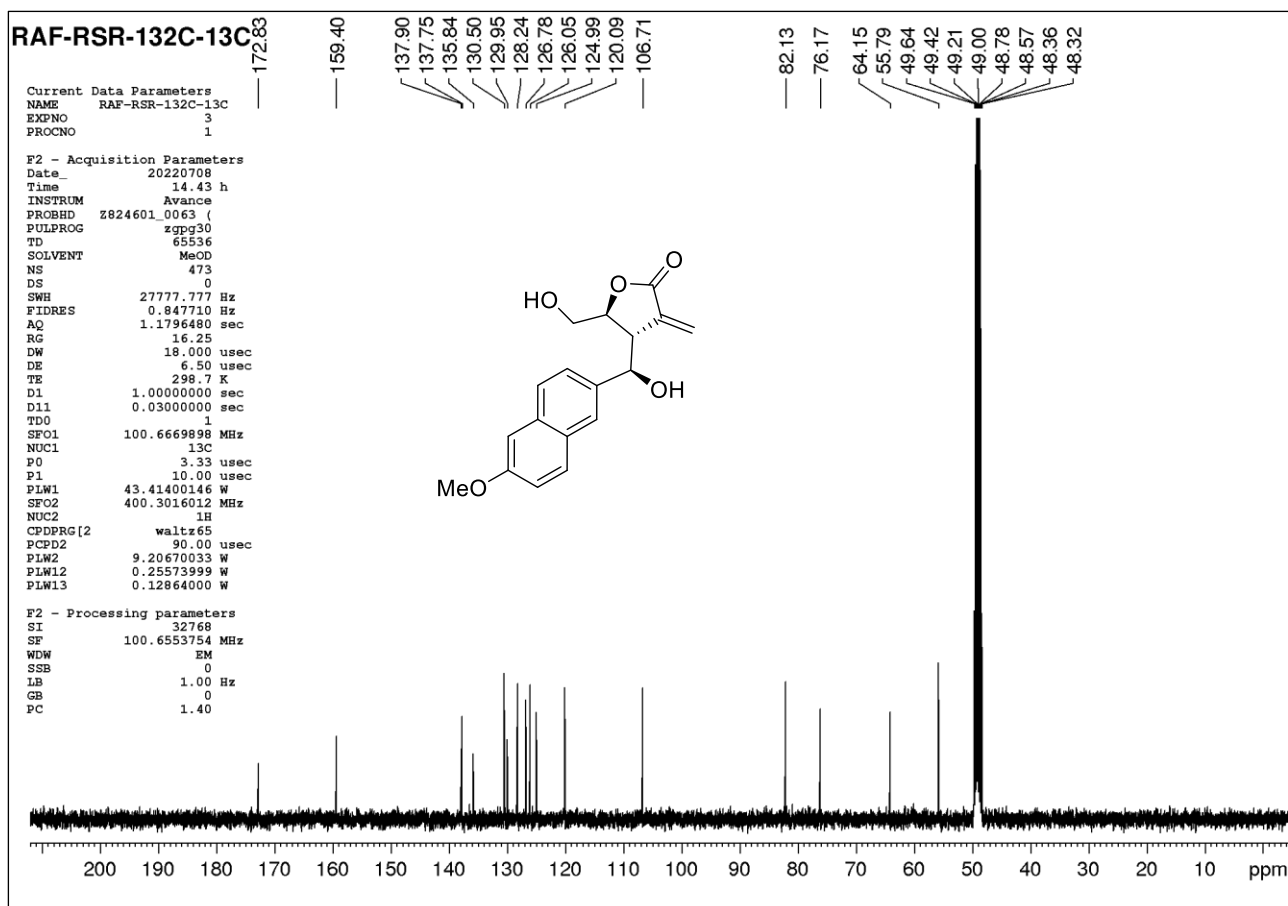

**7i:** HRMS (ESI-TOF)  $m/z$ :  $[M + Na]^+$  Calcd for  $C_{18}H_{18}O_5Na$  337.1046; Found 337.1047.

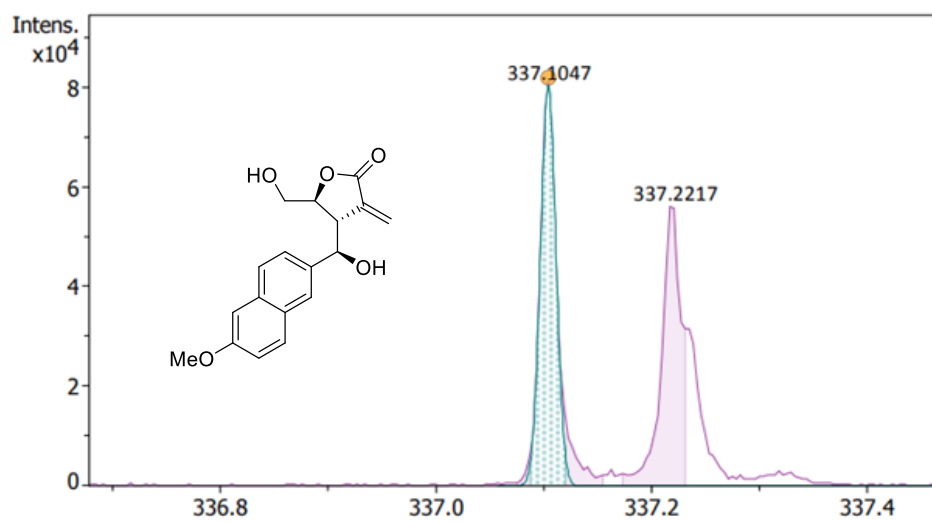

<sup>1</sup>H NMR (500 MHz, CDCl<sub>3</sub>) and <sup>13</sup>C{<sup>1</sup>H} NMR (125 MHz, CDCl<sub>3</sub>) of compound **7j**

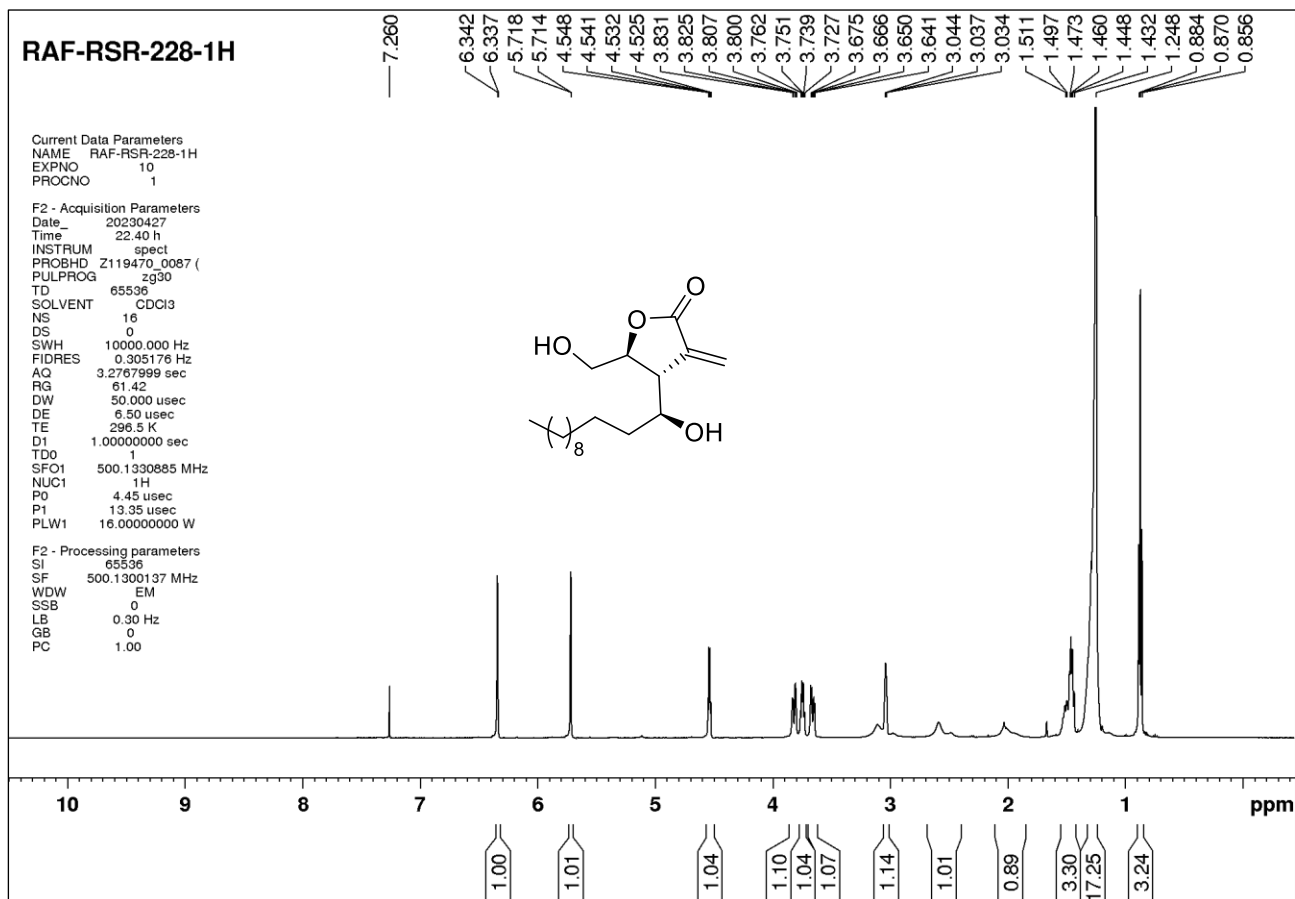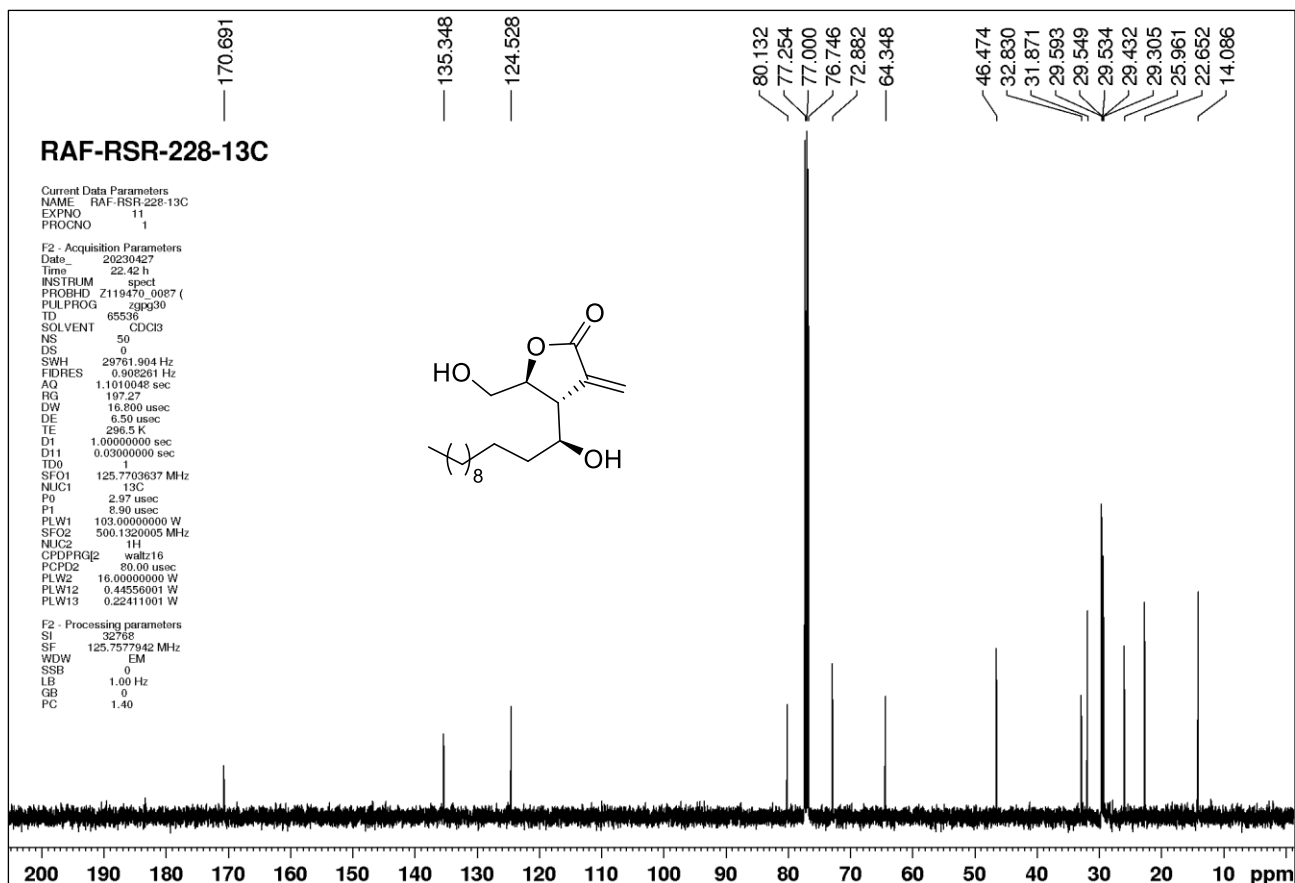

7j: HRMS (ESI-TOF)  $m/z$ :  $[M + H]^+$  Calcd for  $C_{18}H_{33}O_4$  313.2374; Found 313.2372.

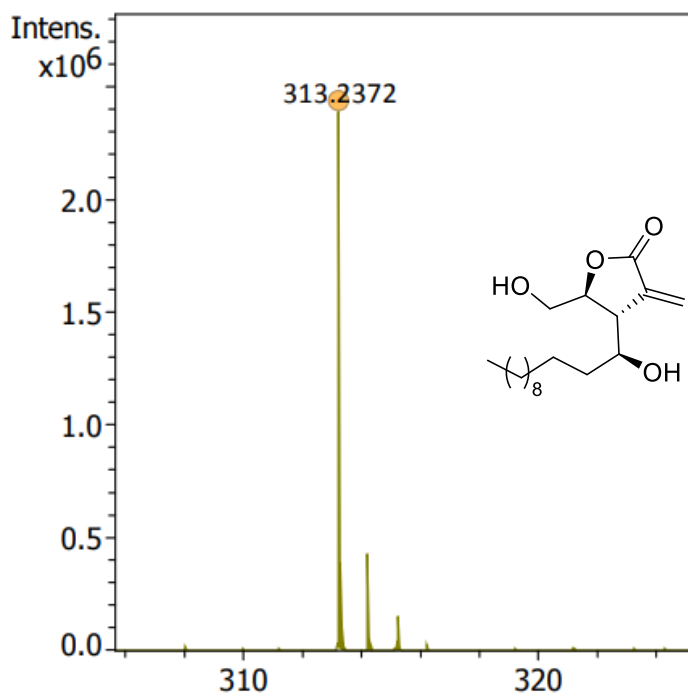

<sup>1</sup>H NMR (500 MHz, CDCl<sub>3</sub>) and <sup>13</sup>C{<sup>1</sup>H} NMR (125 MHz, CDCl<sub>3</sub>) of compound **7k**

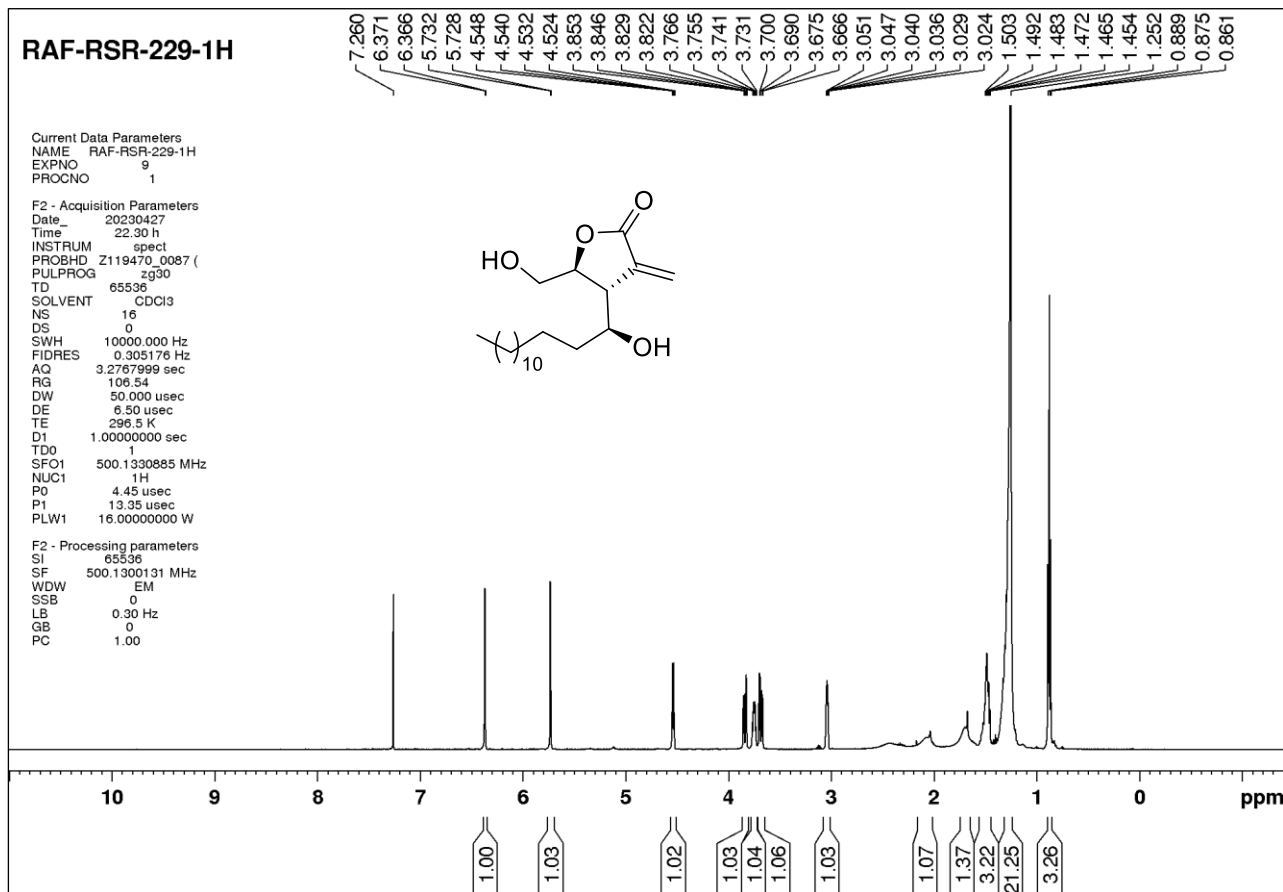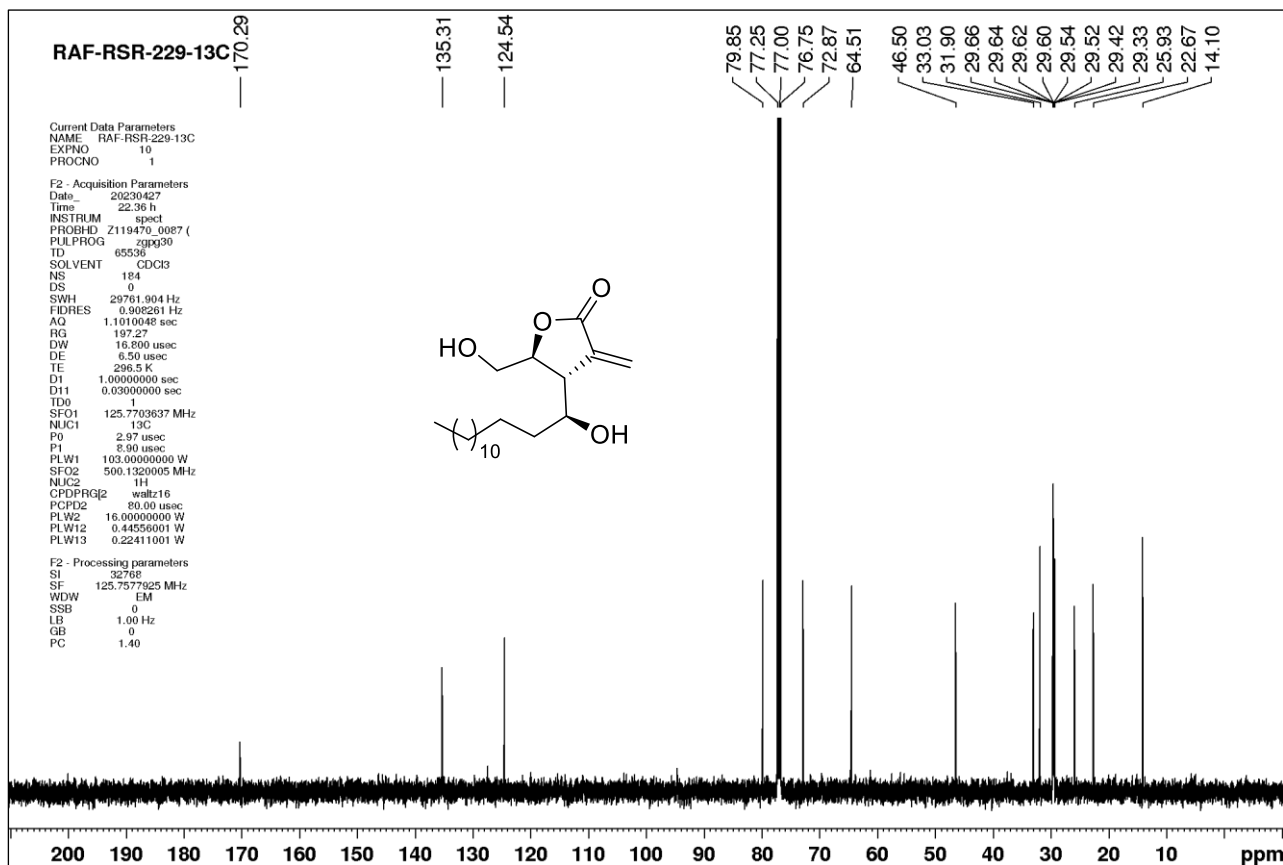



**7k:** HRMS (ESI-TOF)  $m/z$ :  $[M + H]^+$  Calcd for  $C_{20}H_{37}O_4$  341.2687; Found 341.2683.

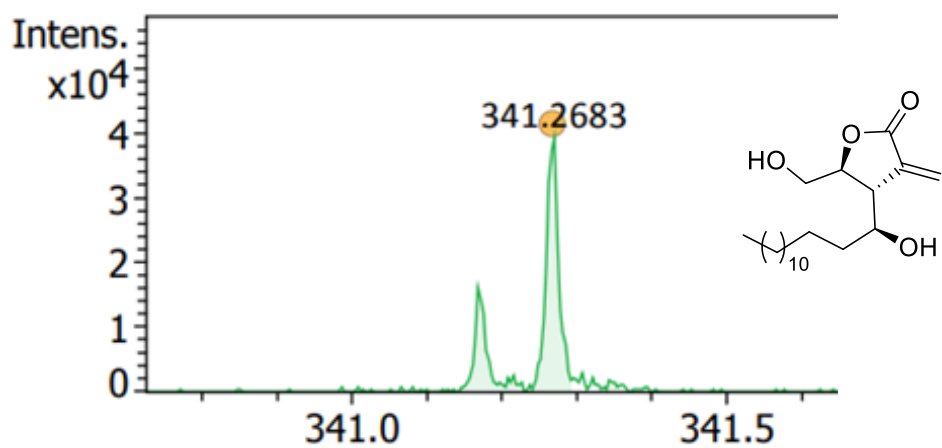

$^1\text{H}$  NMR (500 MHz,  $\text{CDCl}_3$ ) and  $^{13}\text{C}\{^1\text{H}\}$  NMR (125 MHz,  $\text{CDCl}_3$ ) of compound **8a**

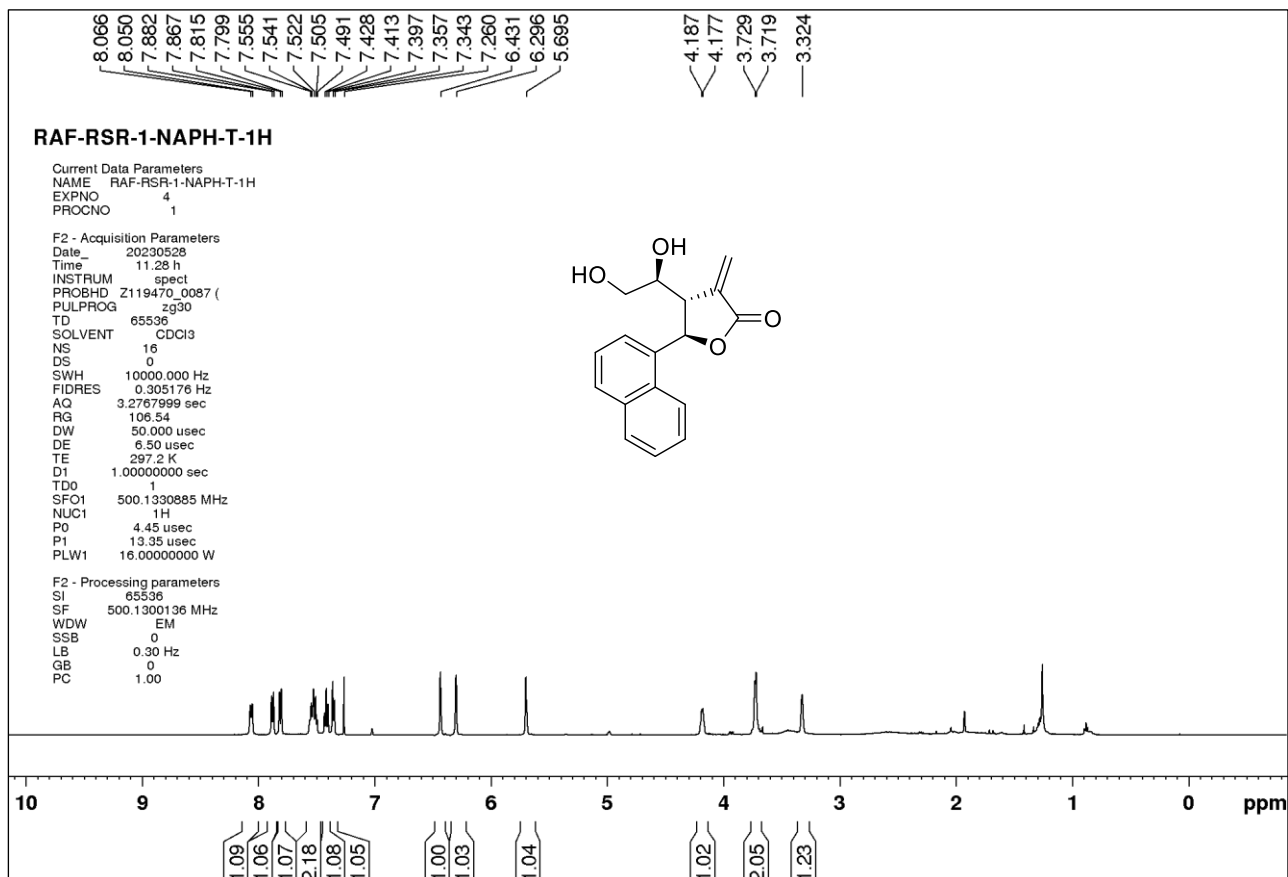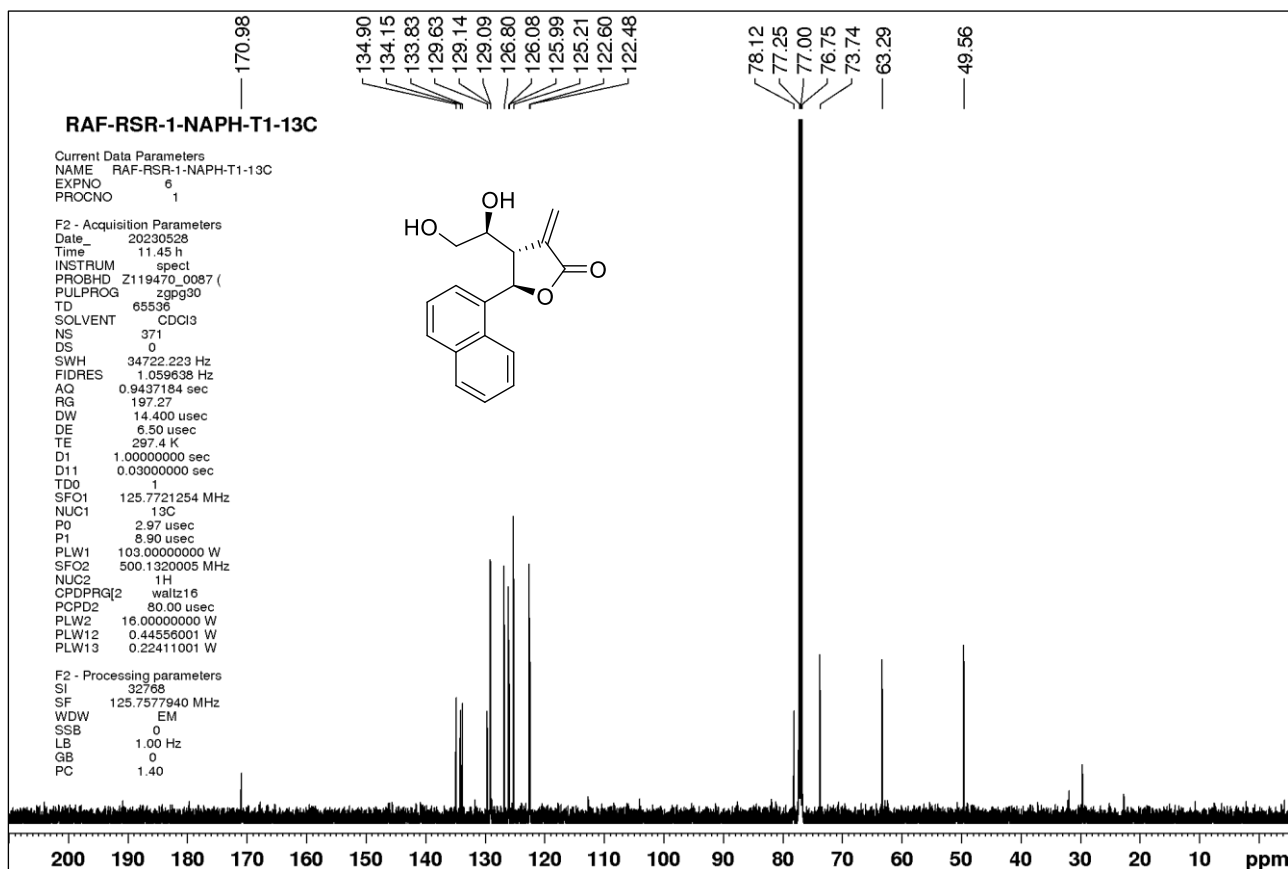

**8a:** HRMS (ESI-TOF)  $m/z$ :  $[M + Na]^+$  Calcd for  $C_{17}H_{16}O_4Na$  307.0941; Found: 307.0949.

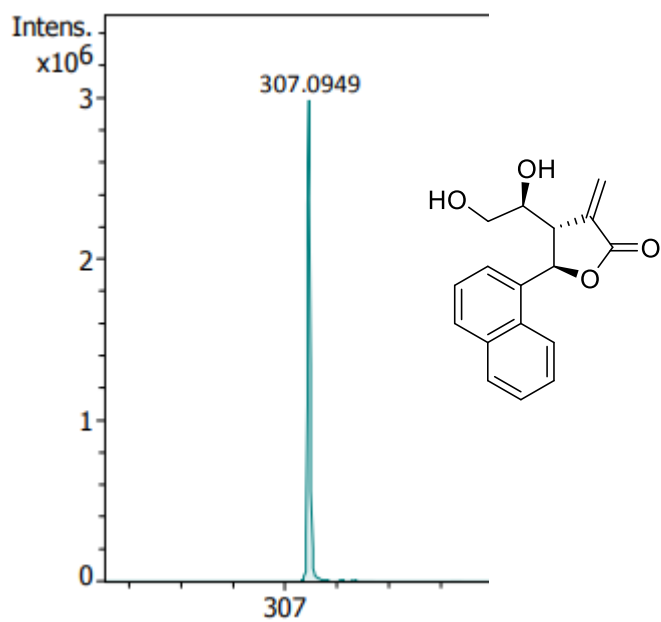

$^1\text{H}$  NMR (500 MHz, MeOH- $d_4$ ) and  $^{13}\text{C}\{^1\text{H}\}$  NMR (125 MHz, MeOH- $d_4$ ) of compound **8b**

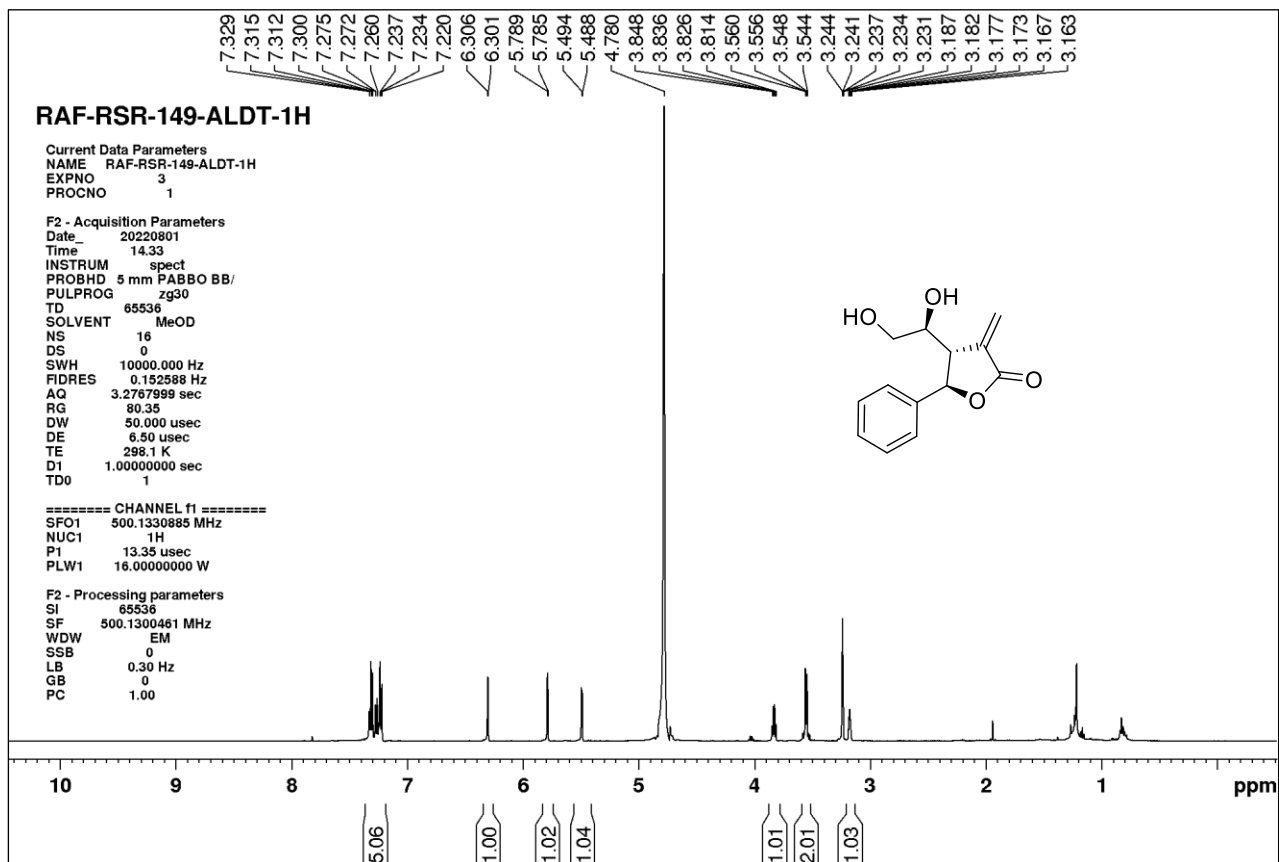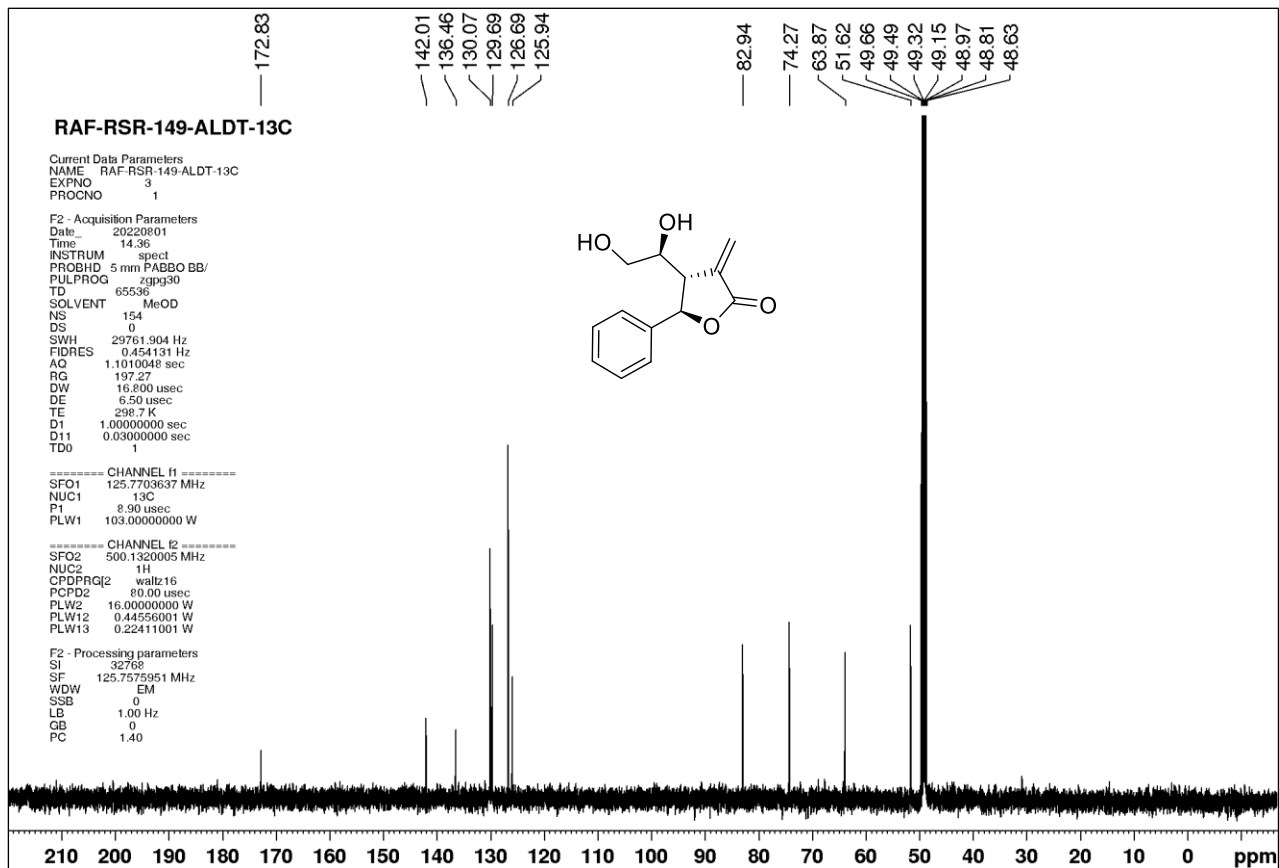

**8b:** HRMS (ESI-TOF)  $m/z$ :  $[M + H]^+$  Calcd for  $C_{13}H_{15}O_4$  235.0966; Found 235.0963.

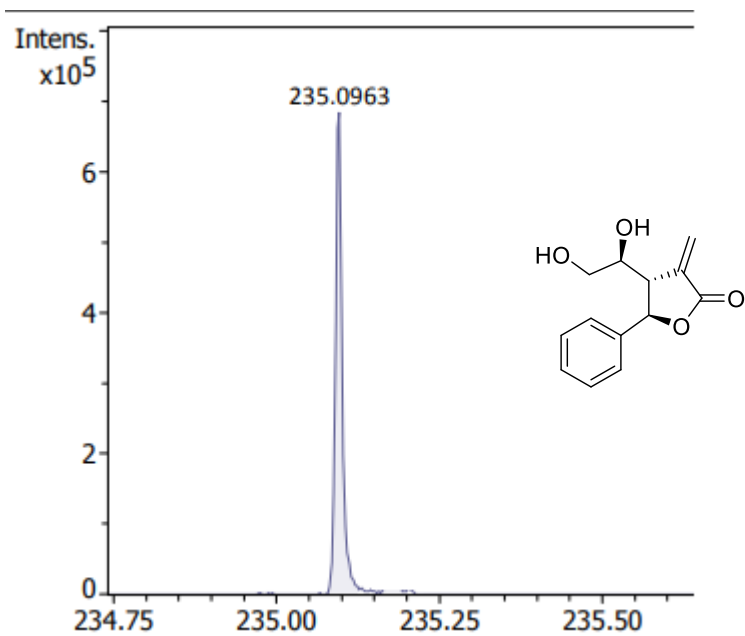

$^1\text{H}$  NMR (500 MHz,  $\text{CDCl}_3$ ) and  $^{13}\text{C}\{^1\text{H}\}$  NMR (125 MHz,  $\text{CDCl}_3$ ) of compound **8c**

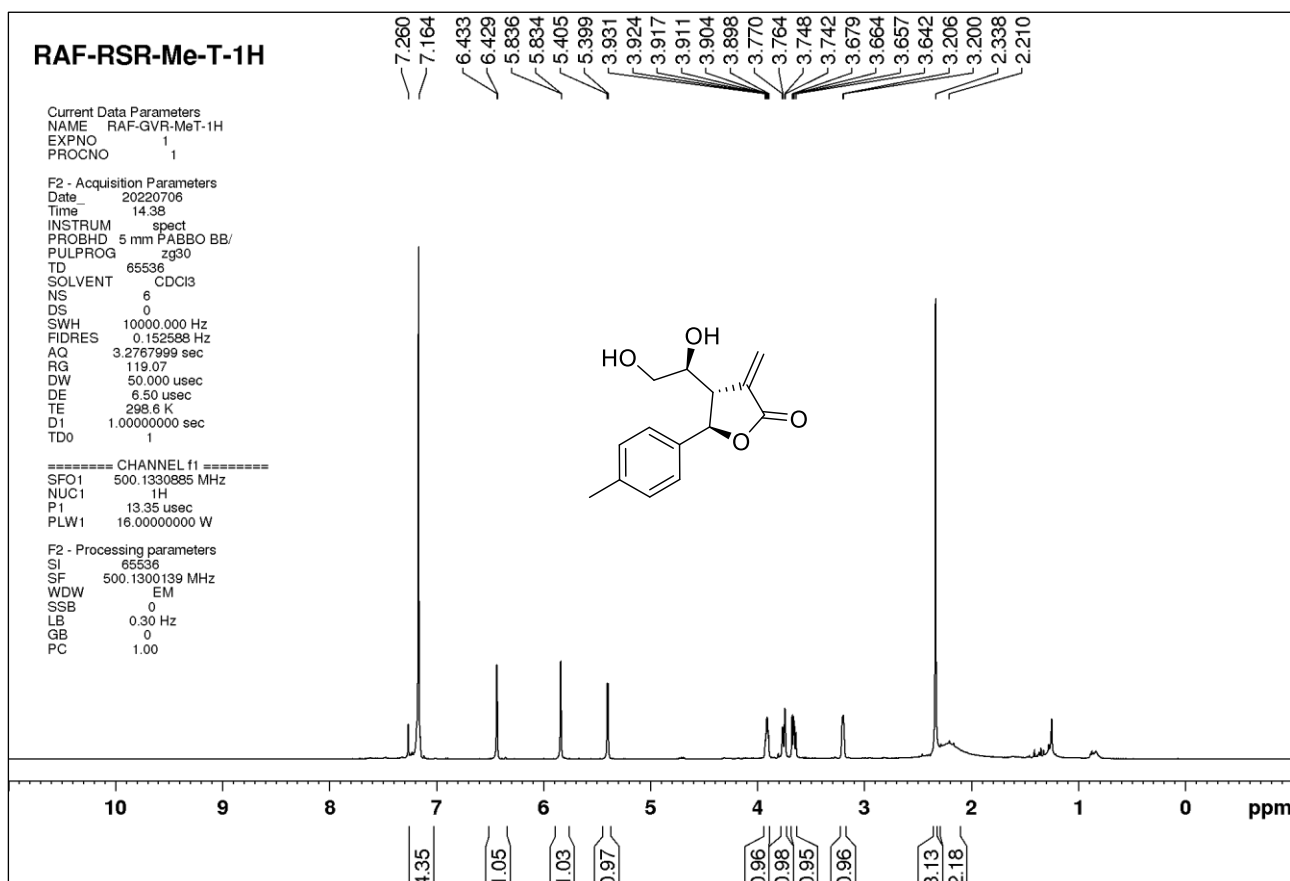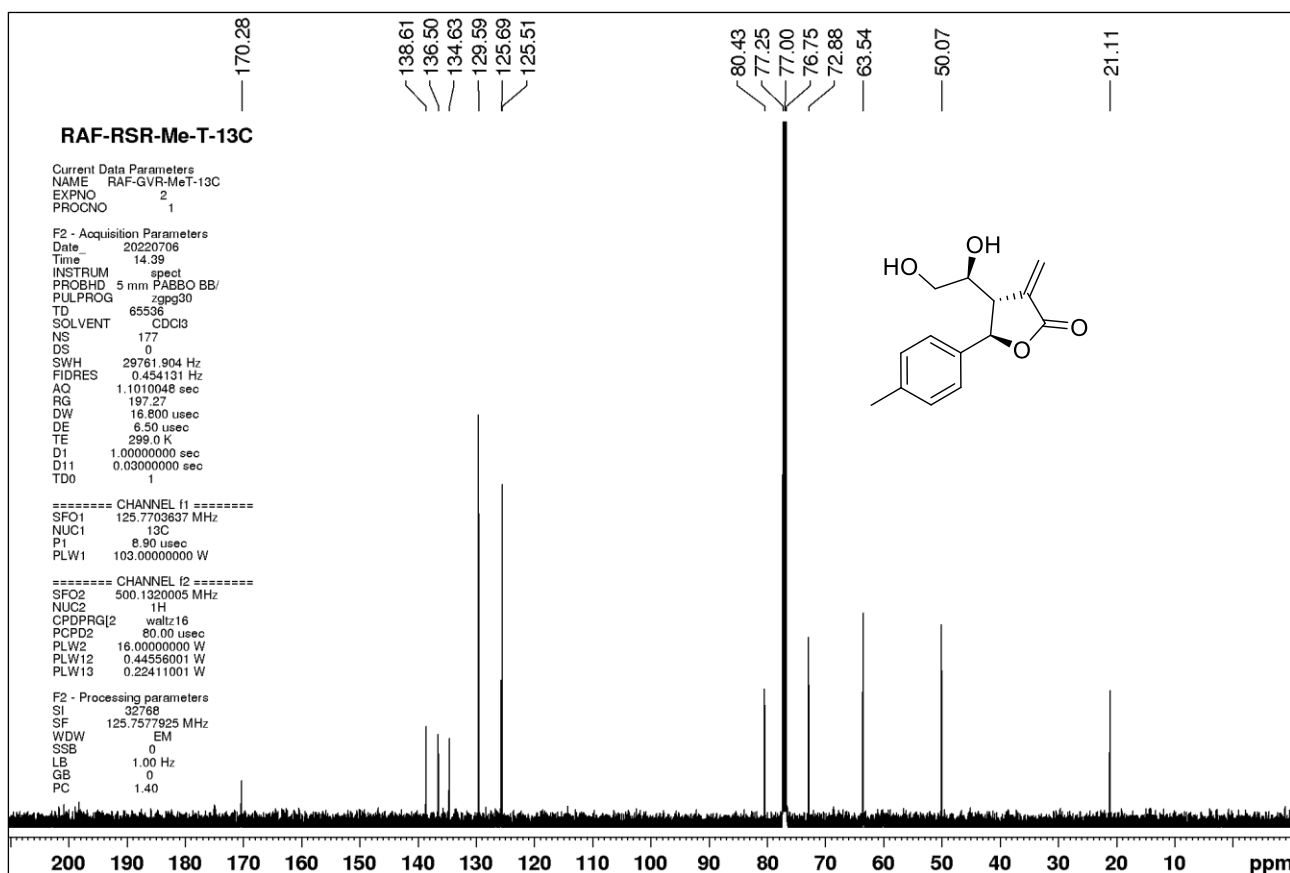

**8c:** HRMS (Q-TOF)  $m/z$ :  $[M + H]^+$  Calcd for  $C_{14}H_{17}O_4$  249.1127; Found 249.1128.

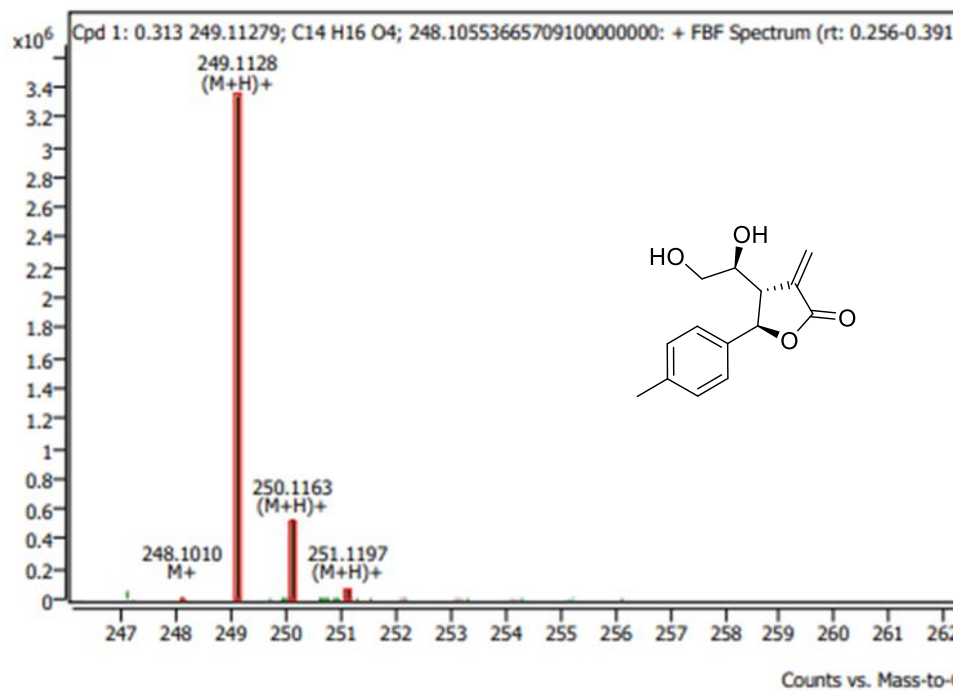

$^1\text{H}$  NMR (500 MHz,  $\text{CDCl}_3$ ) and  $^{13}\text{C}\{^1\text{H}\}$  NMR (125 MHz,  $\text{CDCl}_3$ ) of compound **8d**

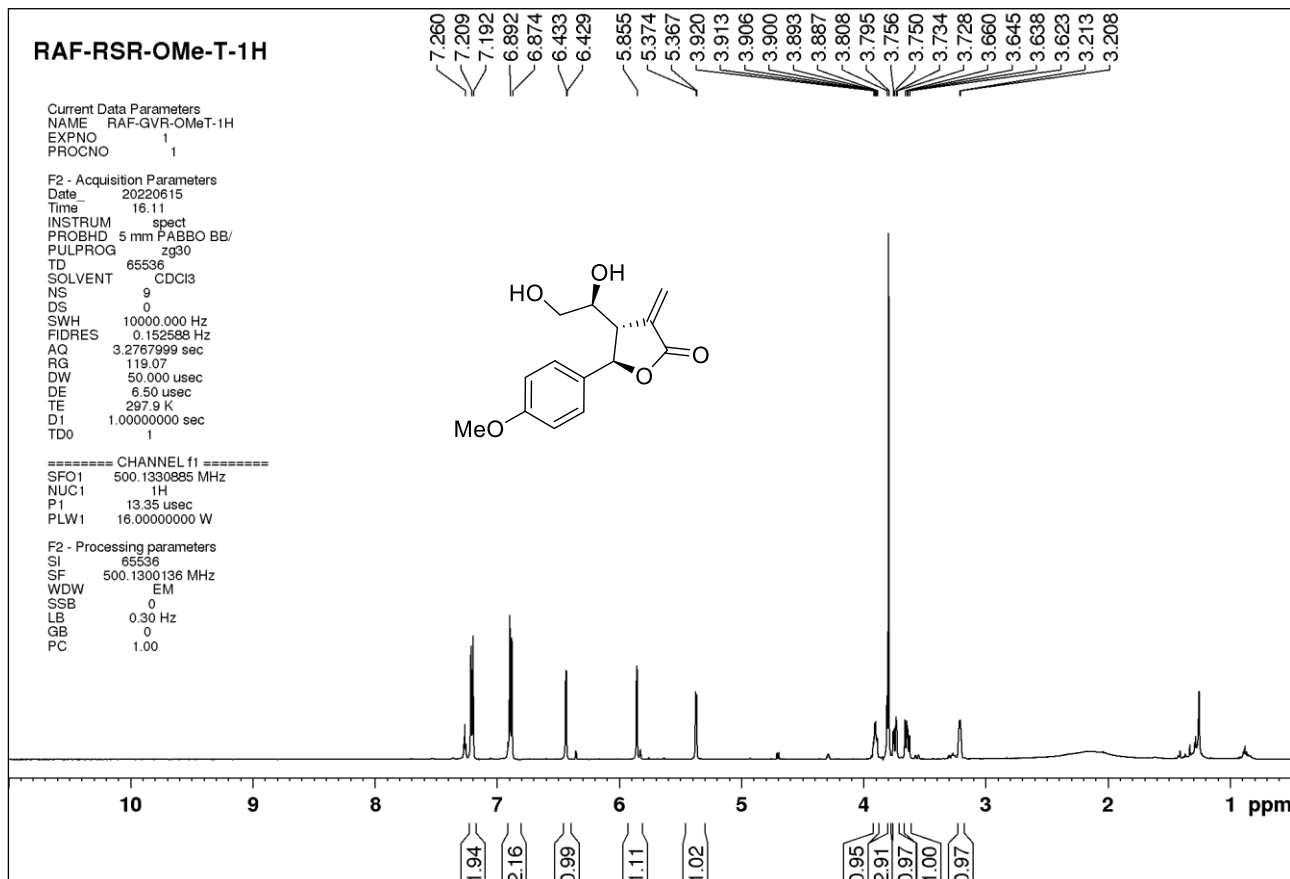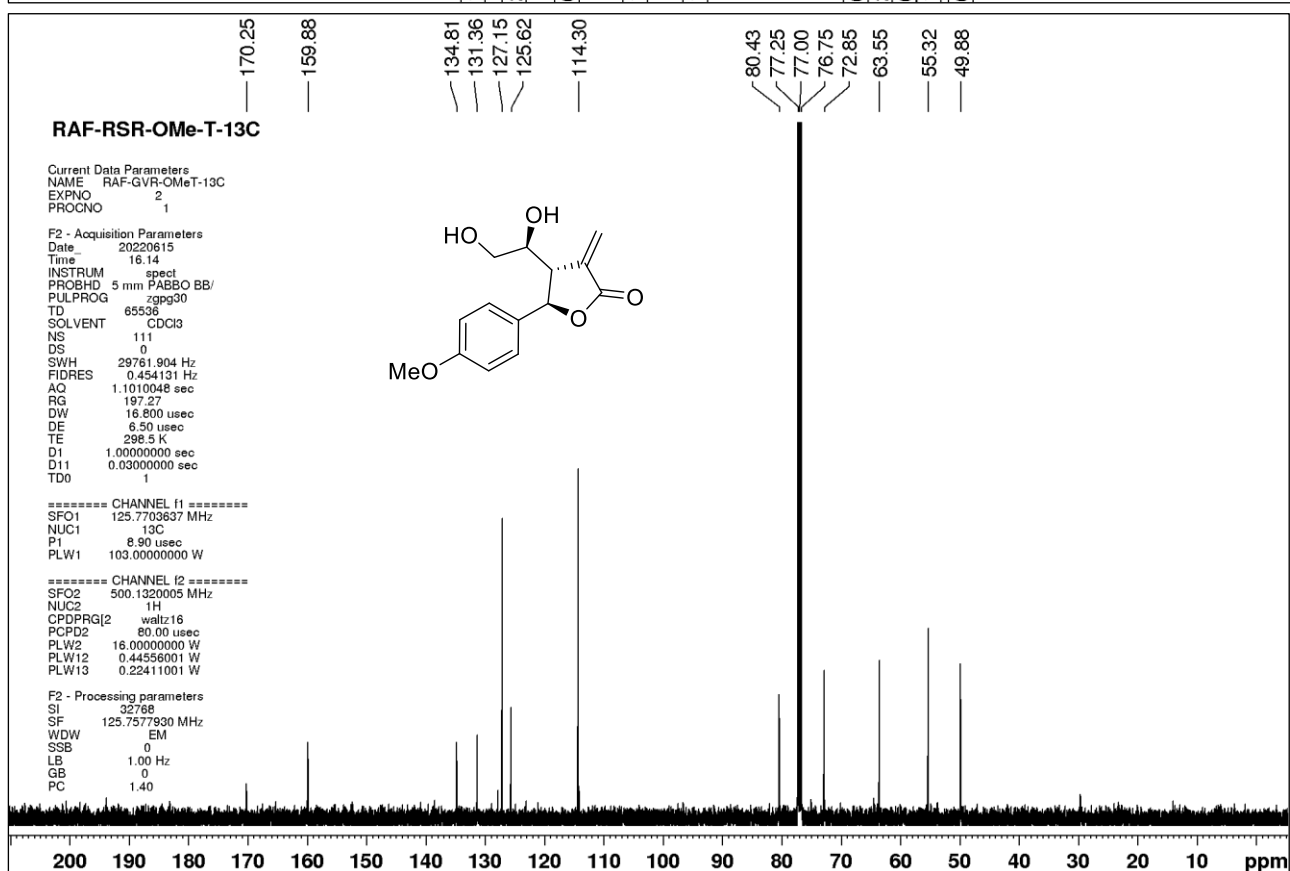



**8d:** HRMS (Q-TOF)  $m/z$ :  $[M + H]^+$  Calcd for  $C_{14}H_{17}O_5$  265.1078; Found 265.1078.

Compound Spectra (Zoomed)

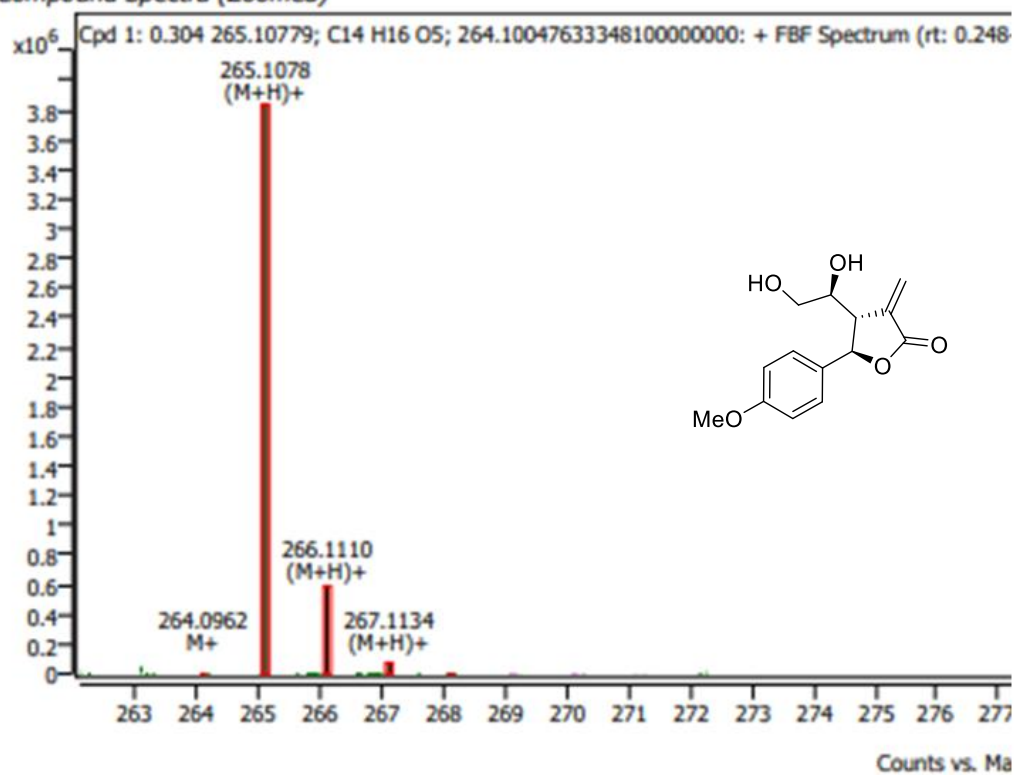

$^1\text{H}$  NMR (400 MHz,  $\text{CDCl}_3$ ) and  $^{13}\text{C}\{^1\text{H}\}$  NMR (100 MHz,  $\text{CDCl}_3$ ) of compound **8e**

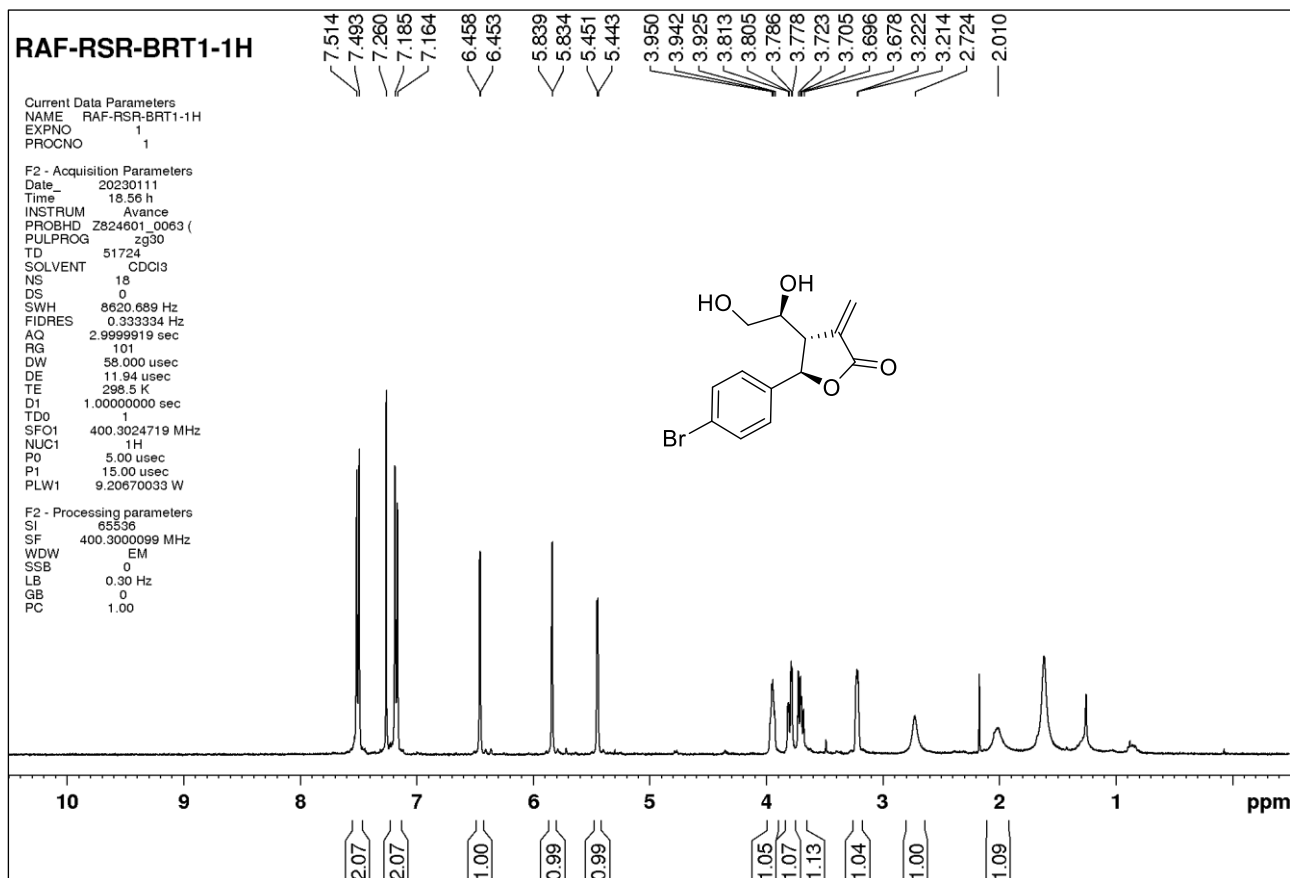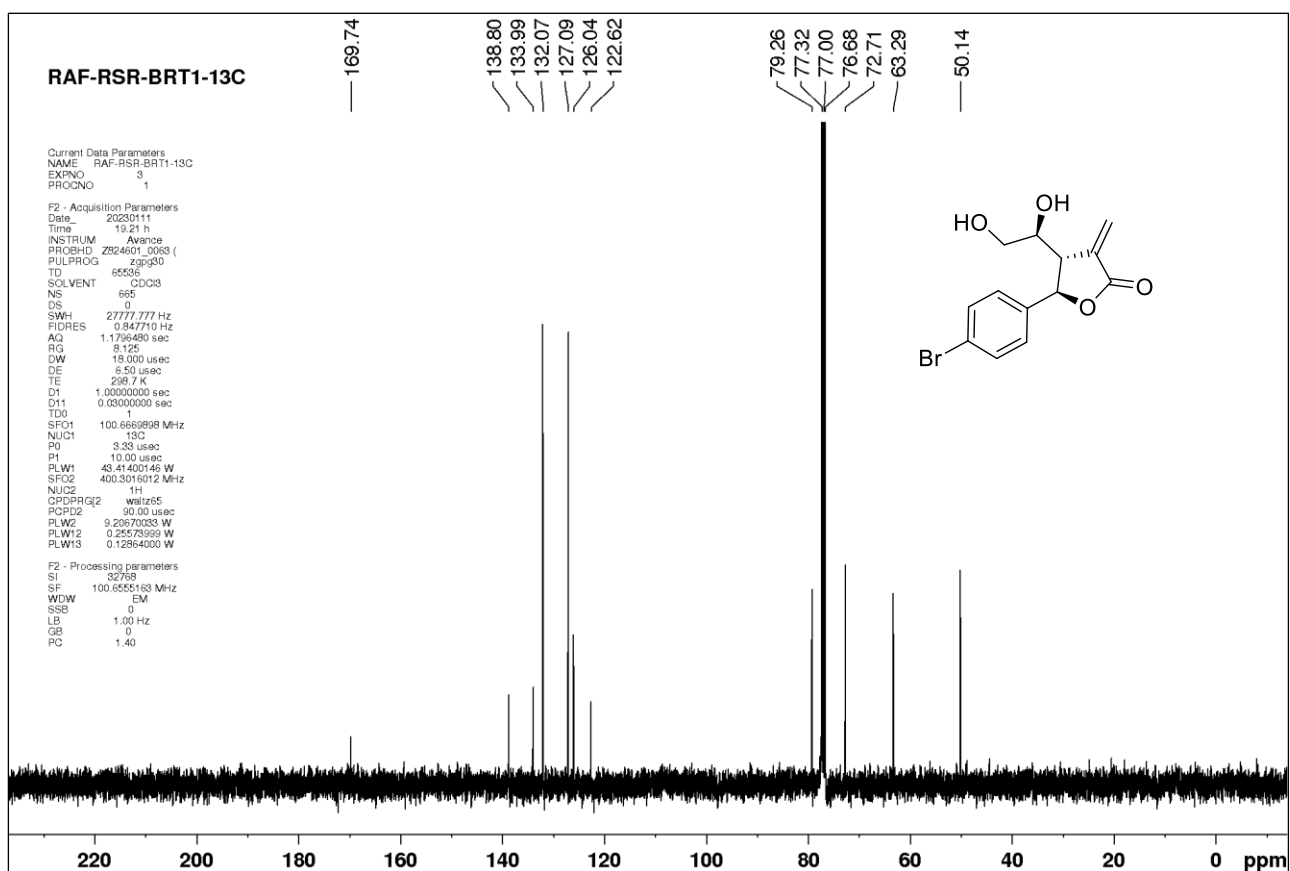

**8e:** HRMS (Q-TOF)  $m/z$ :  $[M + H]^+$  Calcd for  $C_{13}H_{14}BrO_4$  313.0075; Found 313.0076.

Compound Spectra (Zoomed)

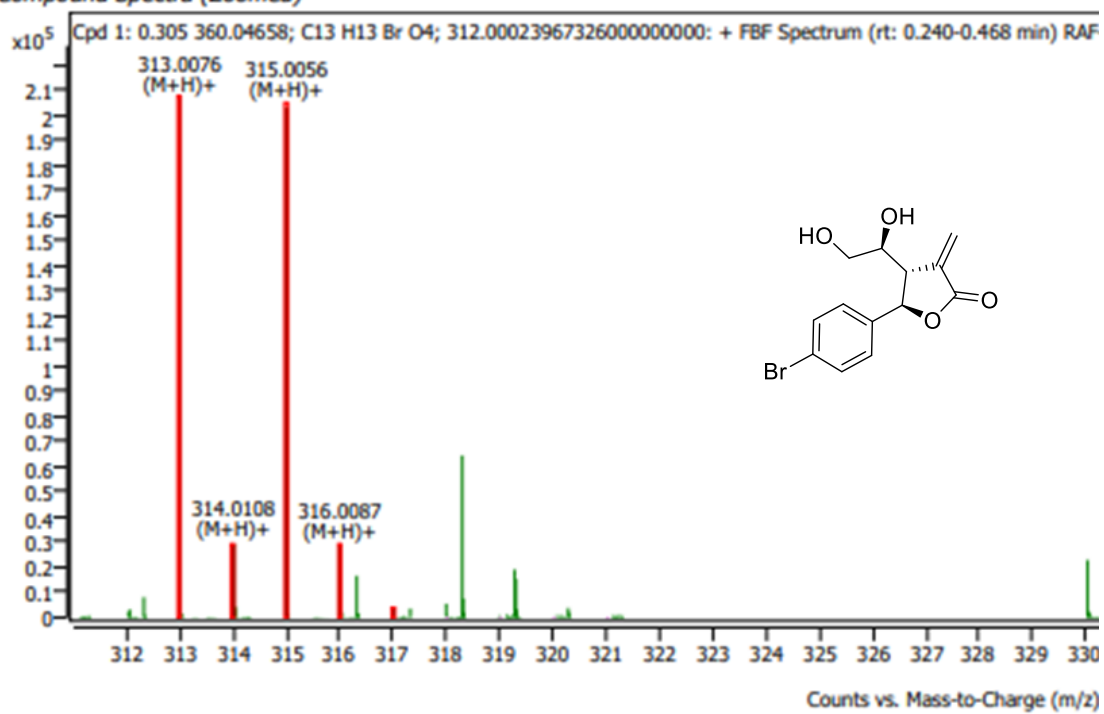

<sup>1</sup>H NMR (400 MHz, CDCl<sub>3</sub>) and <sup>13</sup>C{<sup>1</sup>H} NMR (100 MHz, CDCl<sub>3</sub>) of compound **8f**

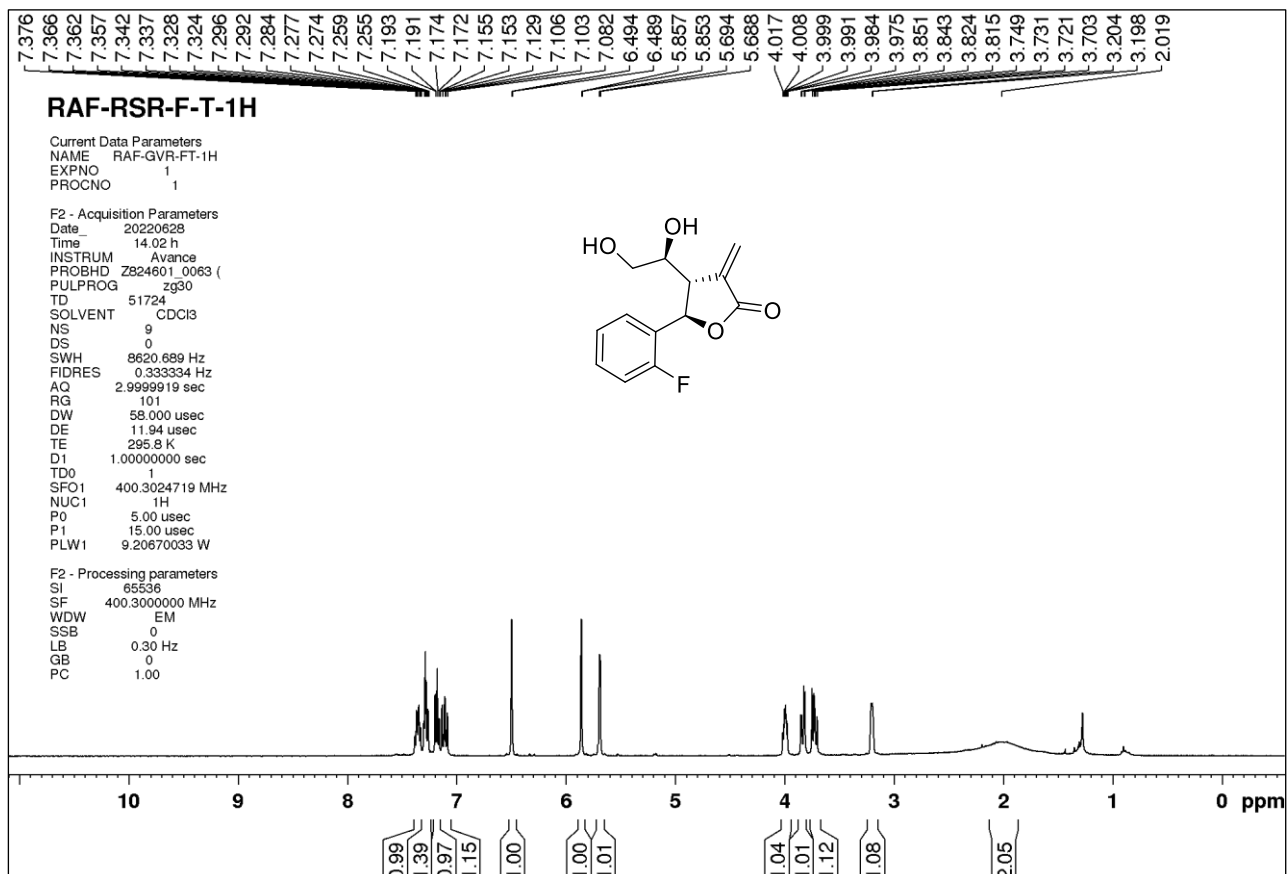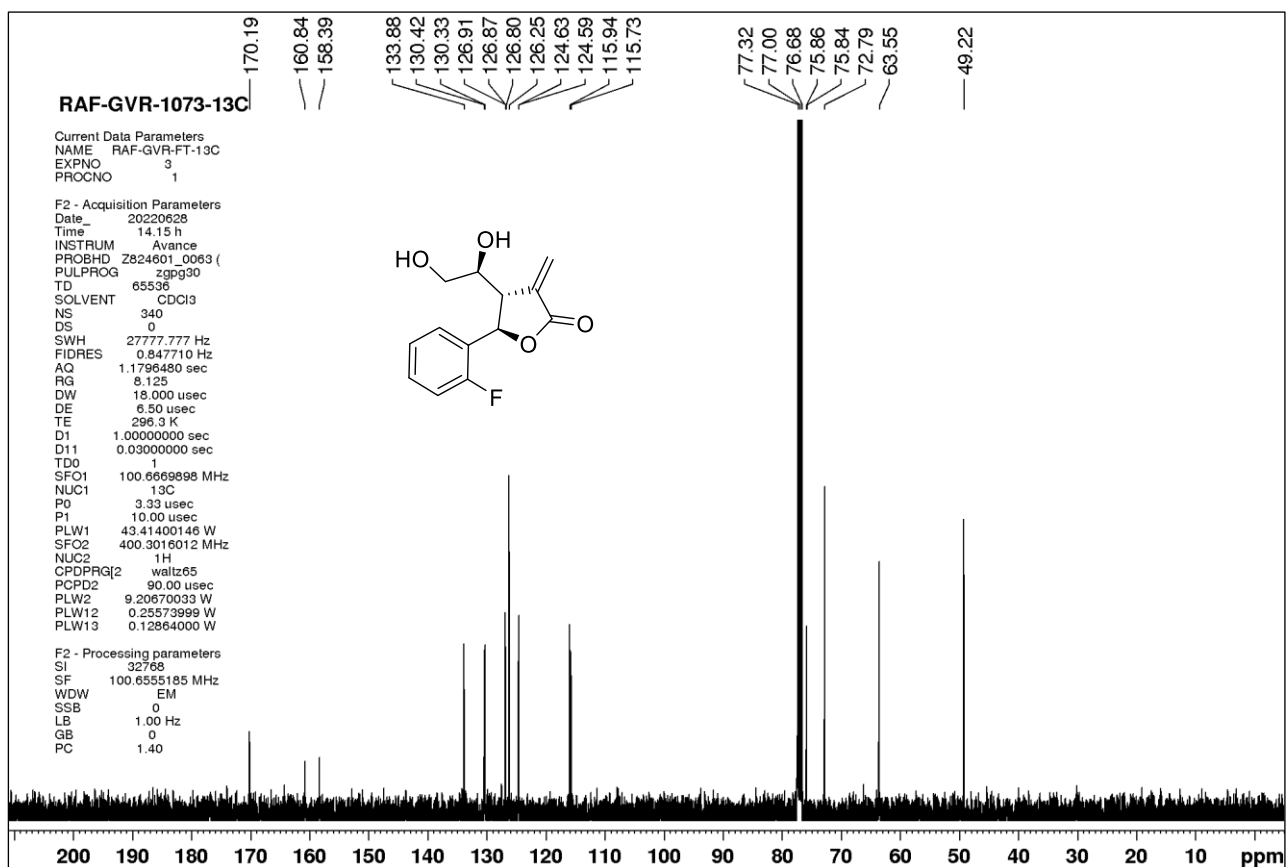

$^{19}\text{F}\{^1\text{H}\}$  NMR (376 MHz,  $\text{CDCl}_3$ ) of compound **8f**

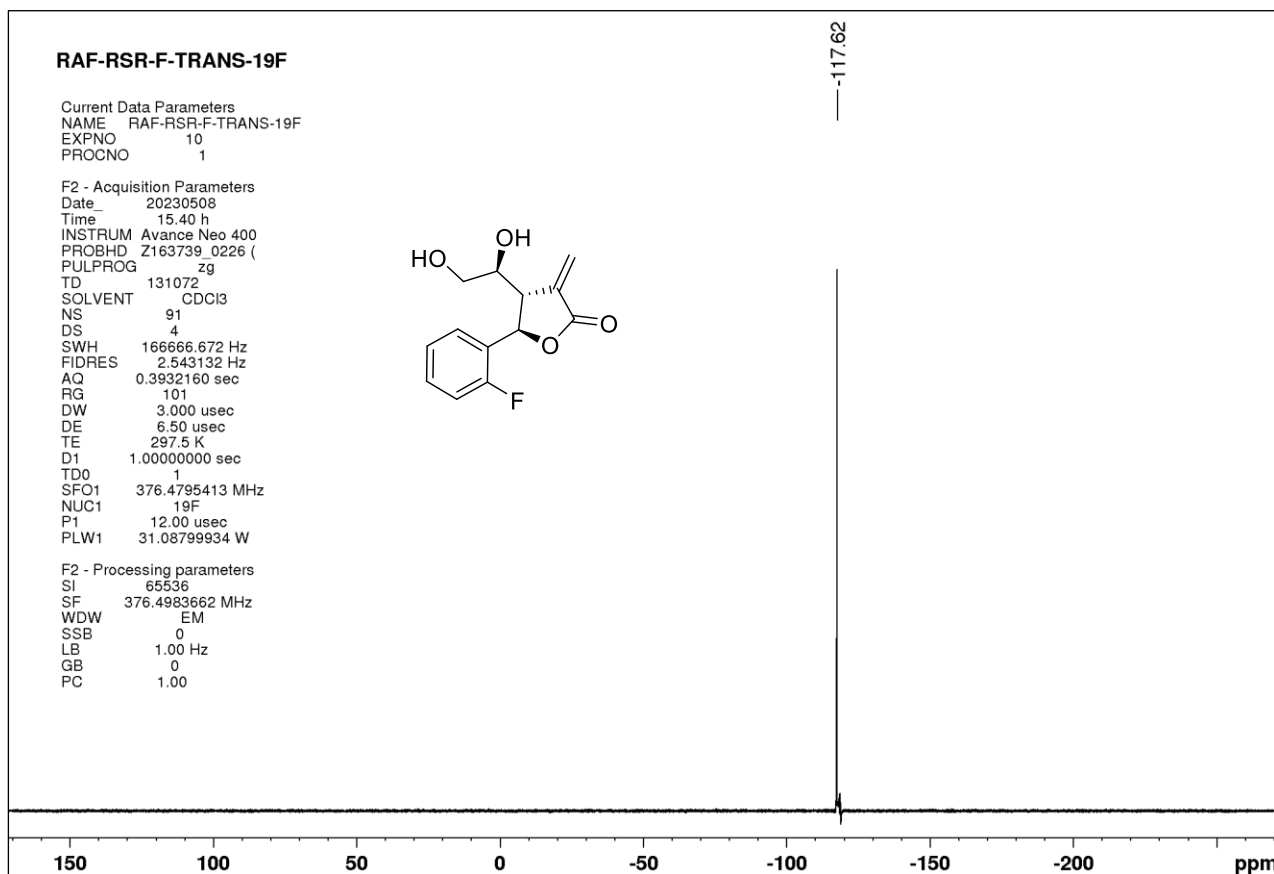

**8f**: HRMS (Q-TOF)  $m/z$ :  $[\text{M} + \text{H}]^+$  Calcd for  $\text{C}_{13}\text{H}_{14}\text{O}_4\text{F}$  253.0871; Found 253.0892.

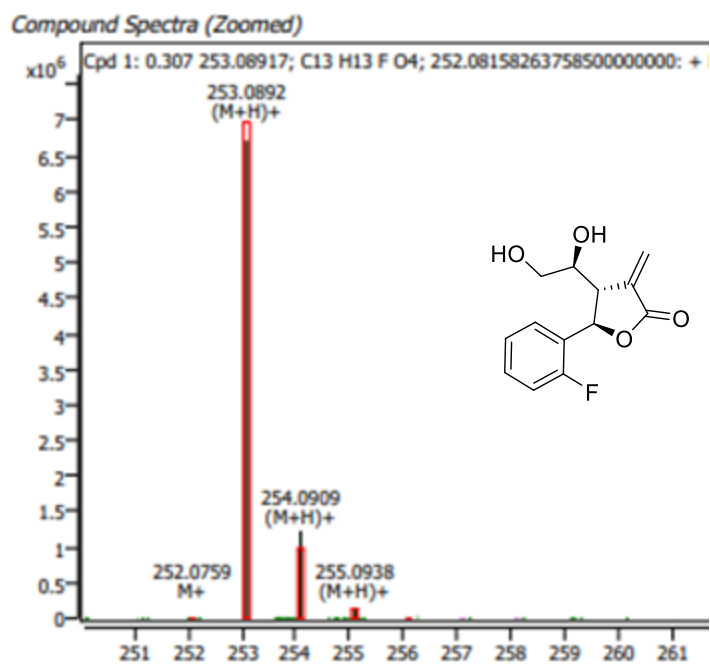

$^1\text{H}$  NMR (500 MHz,  $\text{CDCl}_3$ ) and  $^{13}\text{C}\{^1\text{H}\}$  NMR (100 MHz,  $\text{CDCl}_3$ ) of compound **8g**

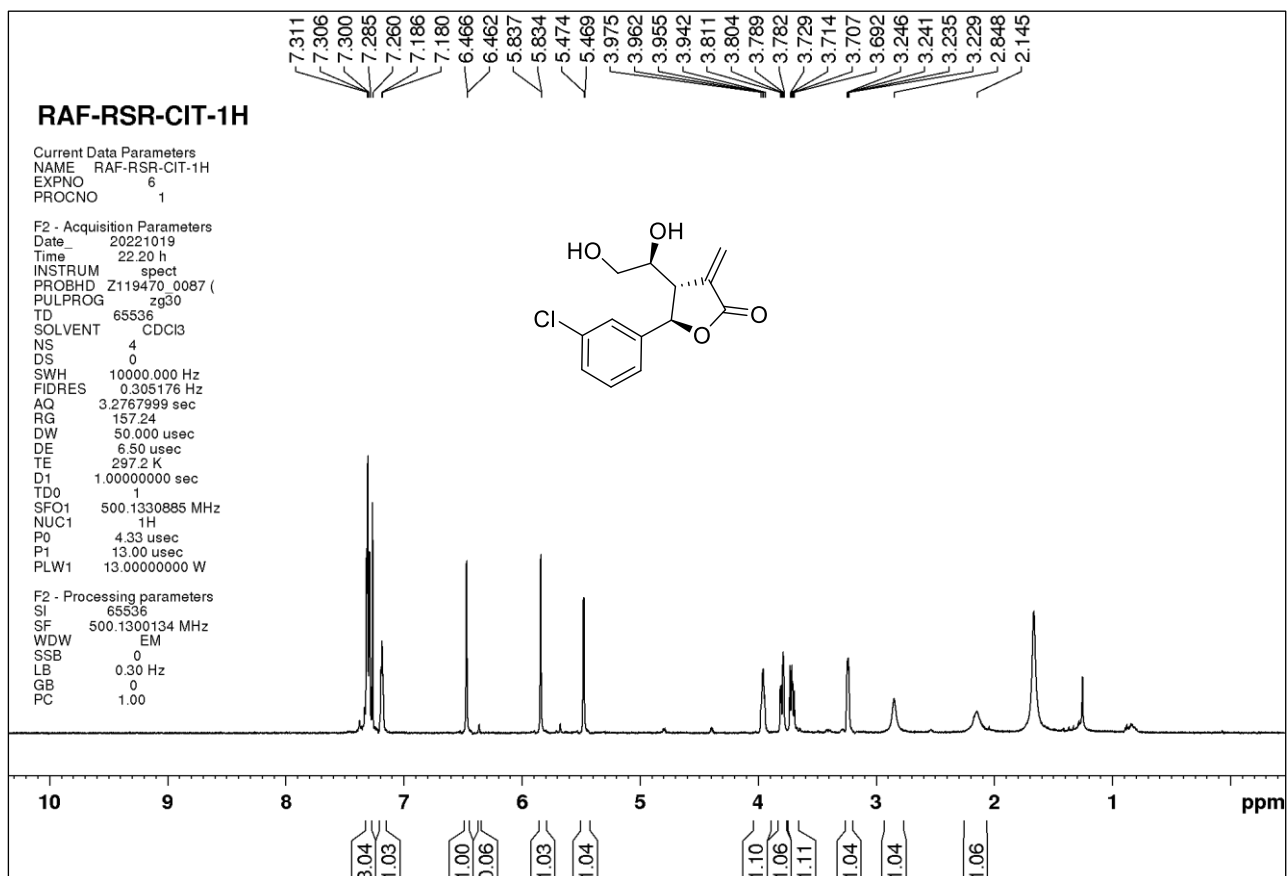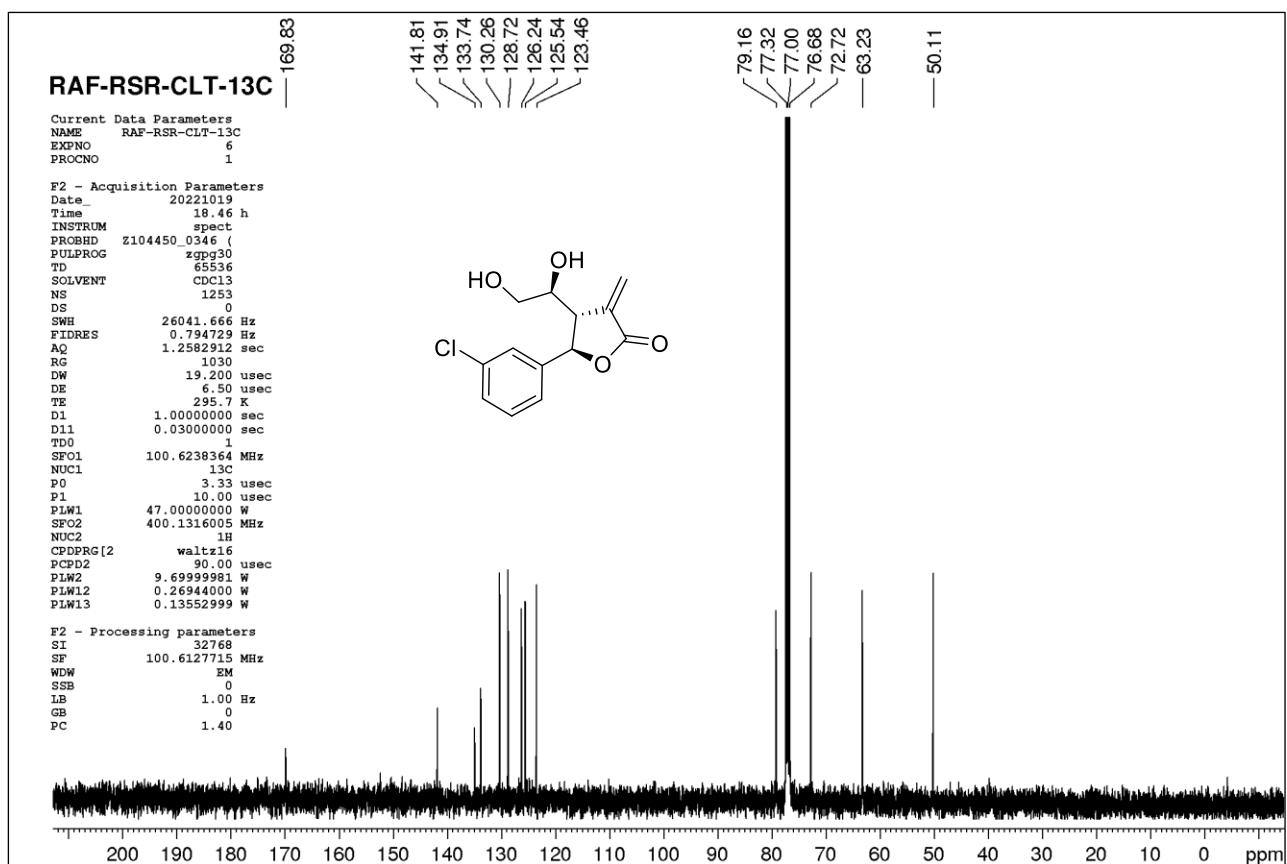

**8g:** HRMS (Q-TOF)  $m/z$ :  $[M + H]^+$  Calcd for  $C_{13}H_{14}ClO_4$  269.0580; Found 269.0587.

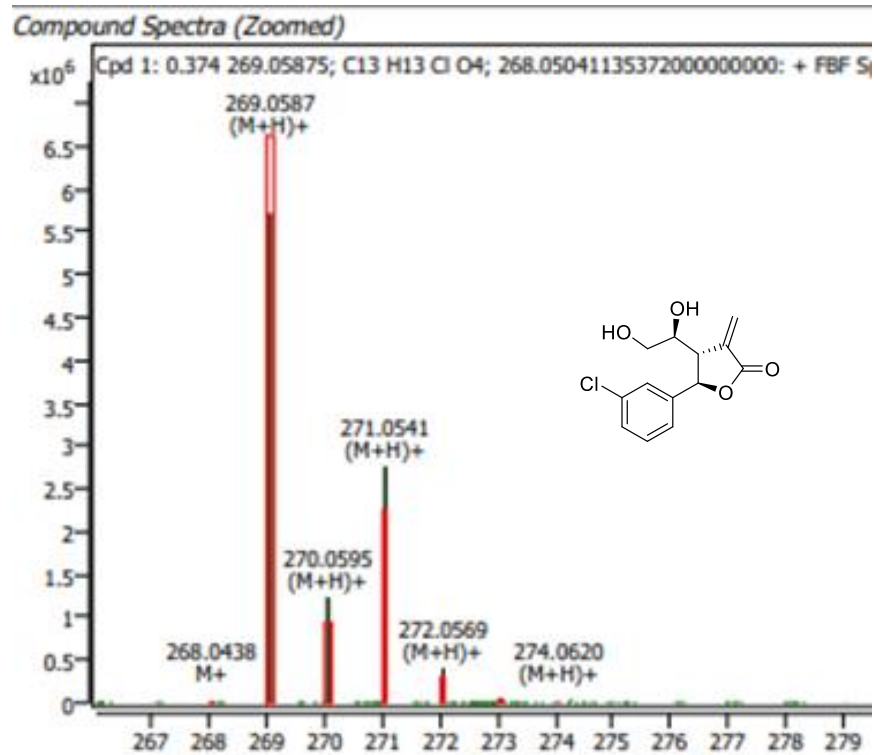

<sup>1</sup>H NMR (400 MHz, CDCl<sub>3</sub>) and <sup>13</sup>C{<sup>1</sup>H} NMR (100 MHz, CDCl<sub>3</sub>) of compound **8h**

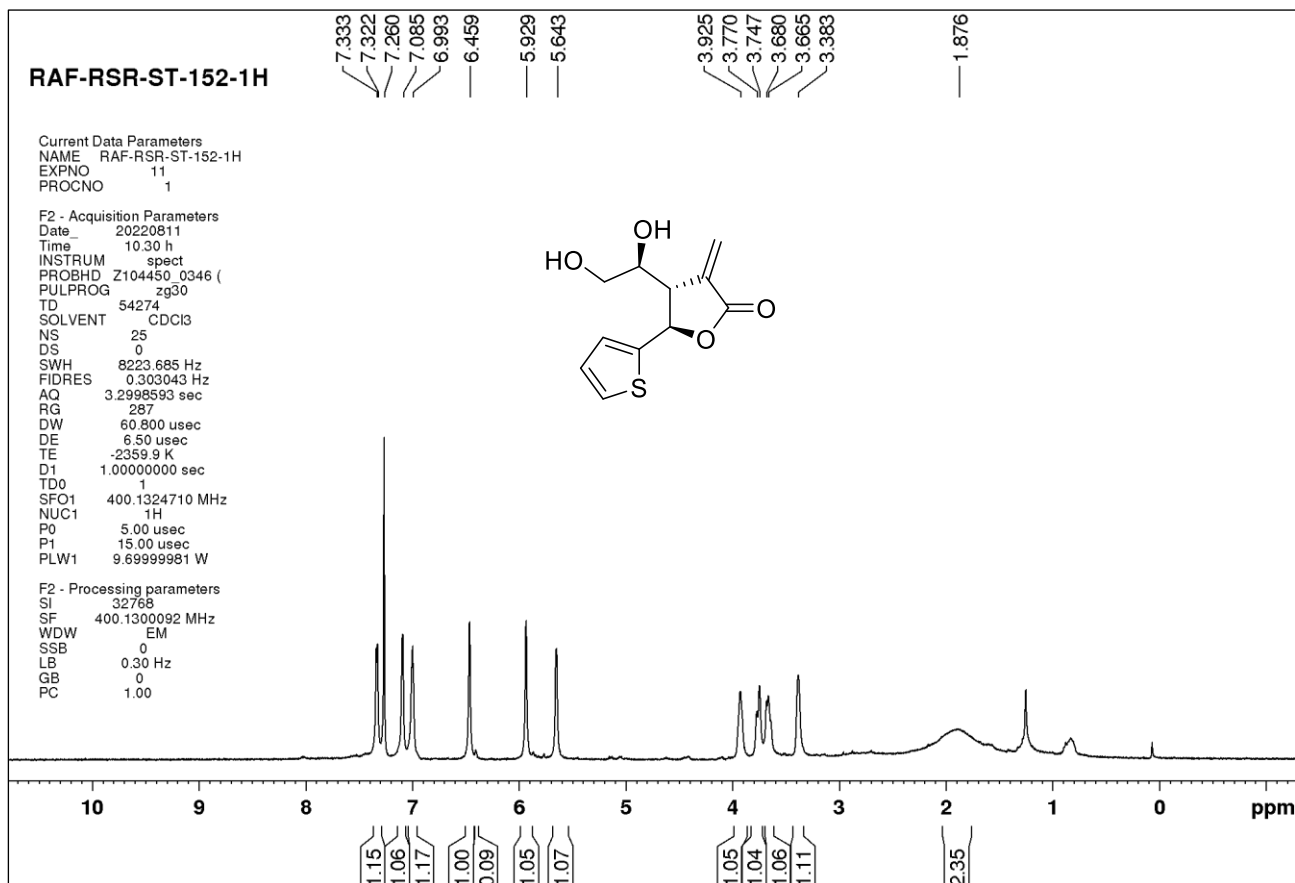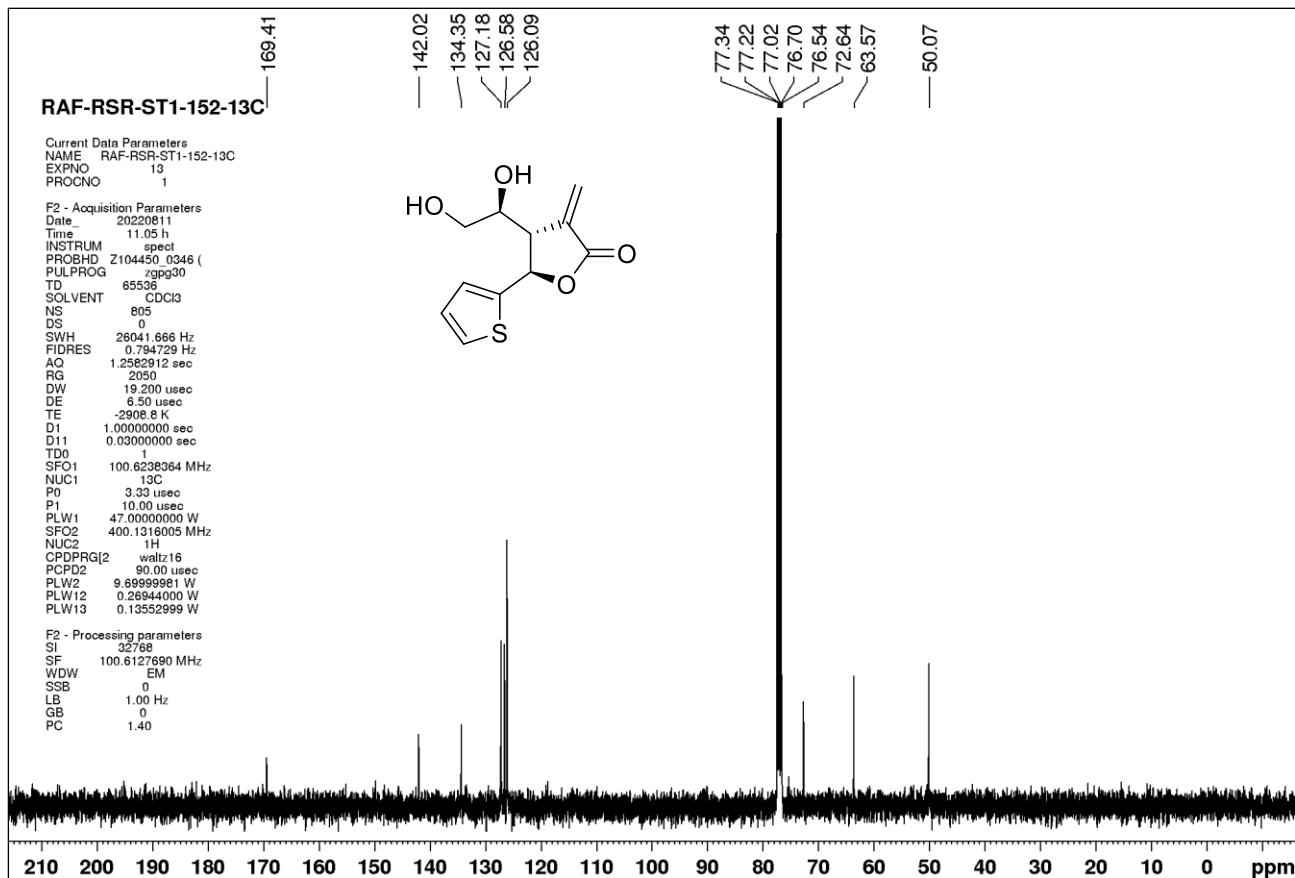



**8h:** HRMS (Q-TOF)  $m/z$ :  $[M + H]^+$  Calcd for  $C_{11}H_{13}SO_4$  241.0515; Found 241.0513.

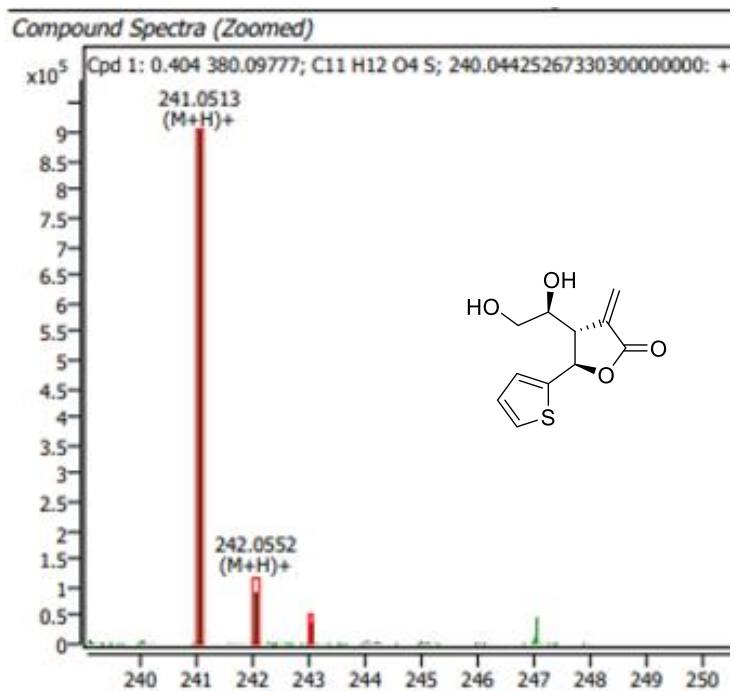

$^1\text{H}$  NMR (400 MHz, MeOH- $d_4$ ) and  $^{13}\text{C}\{^1\text{H}\}$  NMR (100 MHz, MeOH- $d_4$ ) of compound **8i**

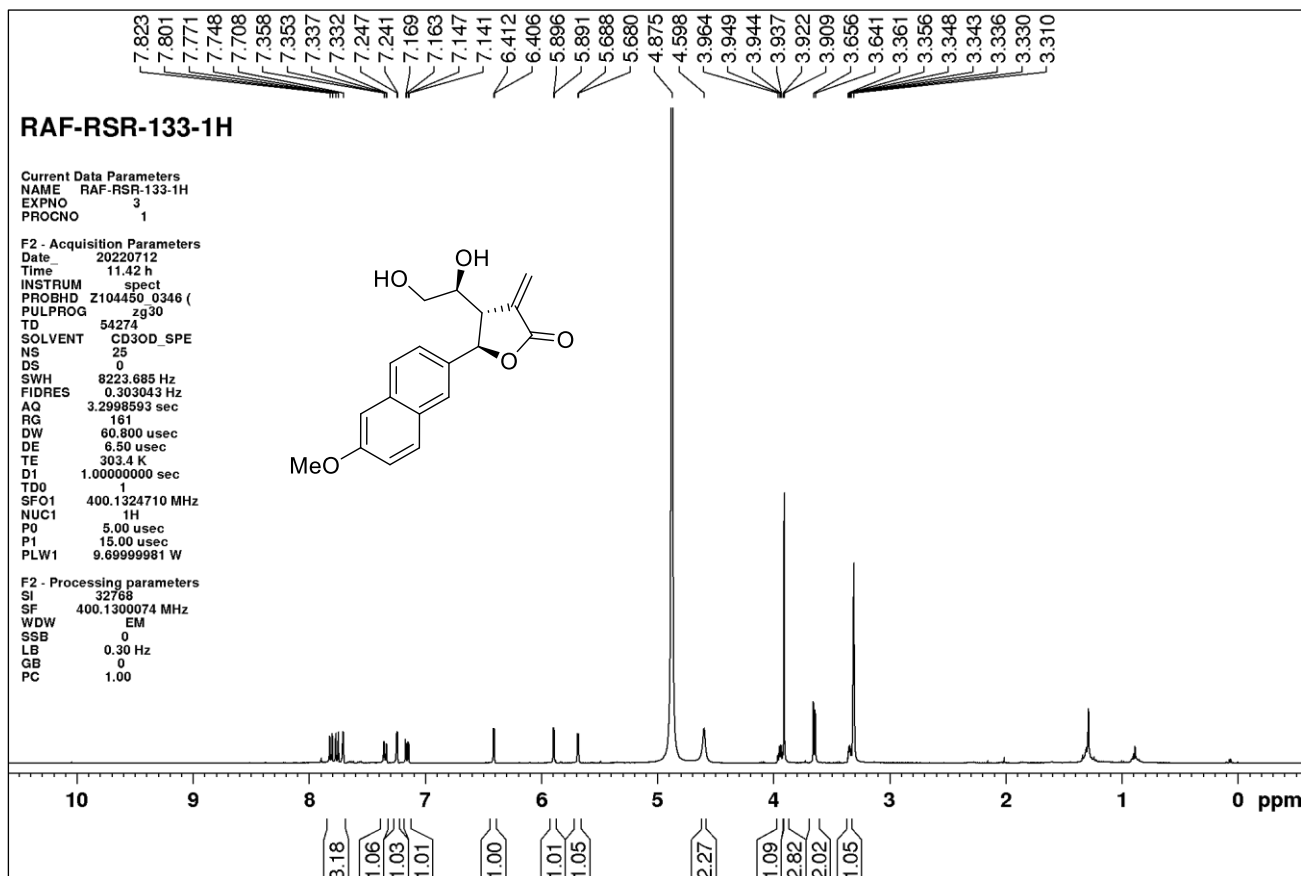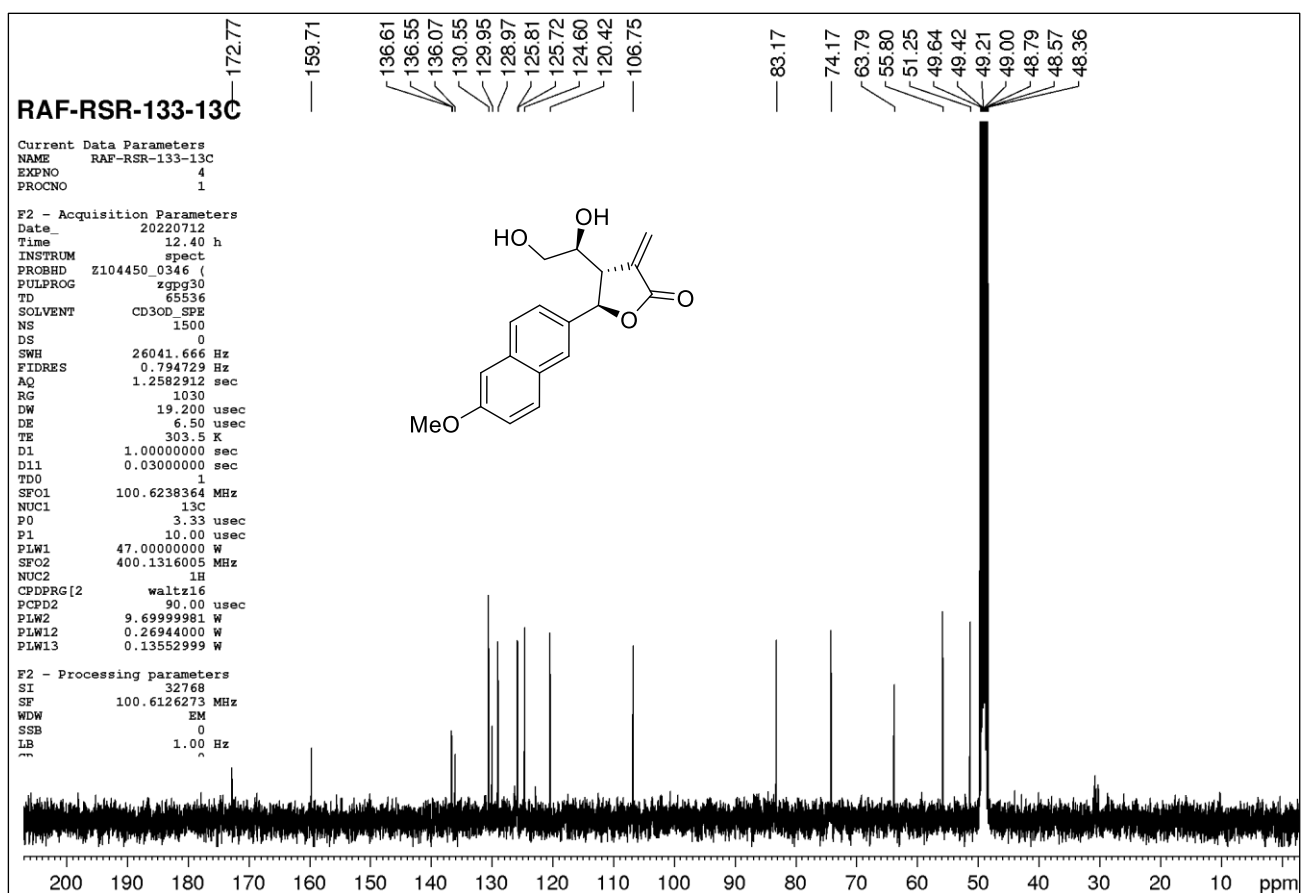

8i: HRMS (Q-TOF)  $m/z$ :  $[M + H]^+$  Calcd for  $C_{18}H_{19}O_5$  315.1231; Found 315.1231.

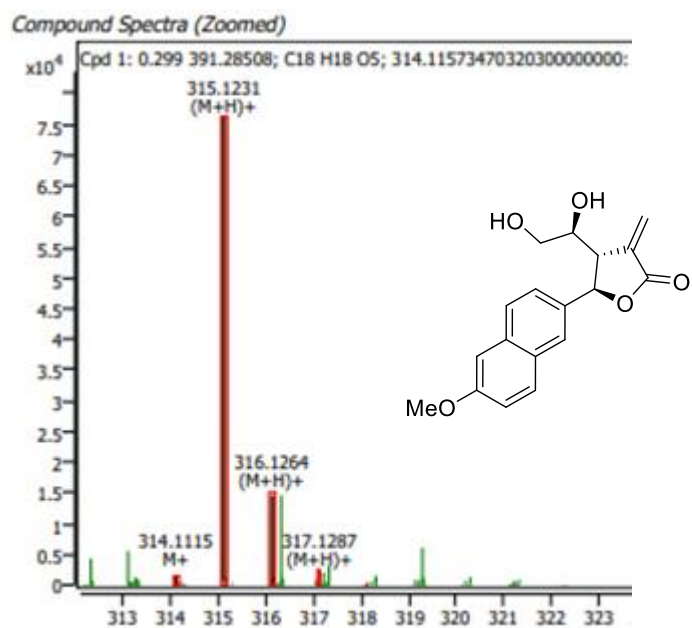

<sup>1</sup>H NMR (400 MHz, CDCl<sub>3</sub>) and <sup>13</sup>C{<sup>1</sup>H} NMR (100 MHz, CDCl<sub>3</sub>) of compound **8j**

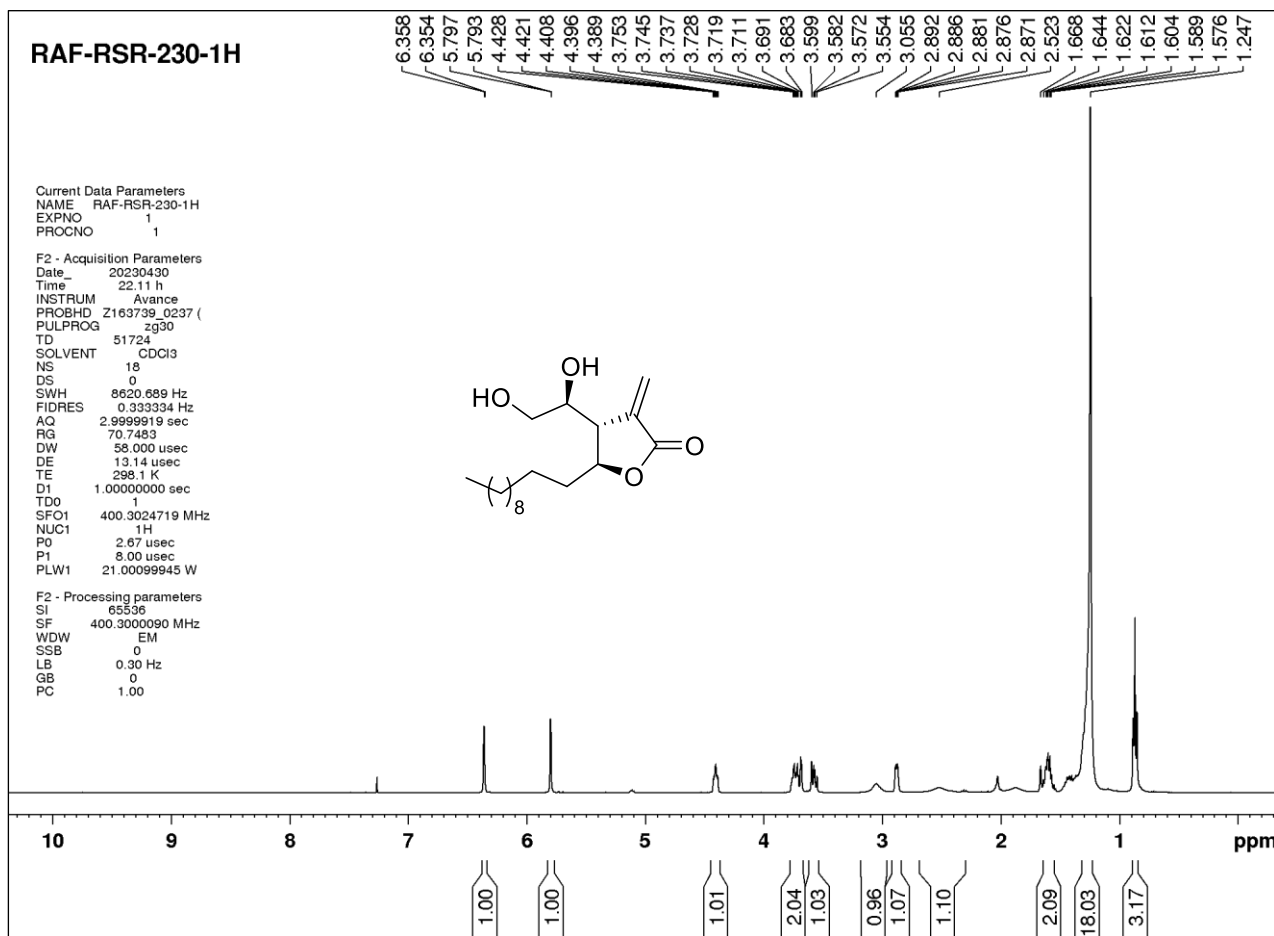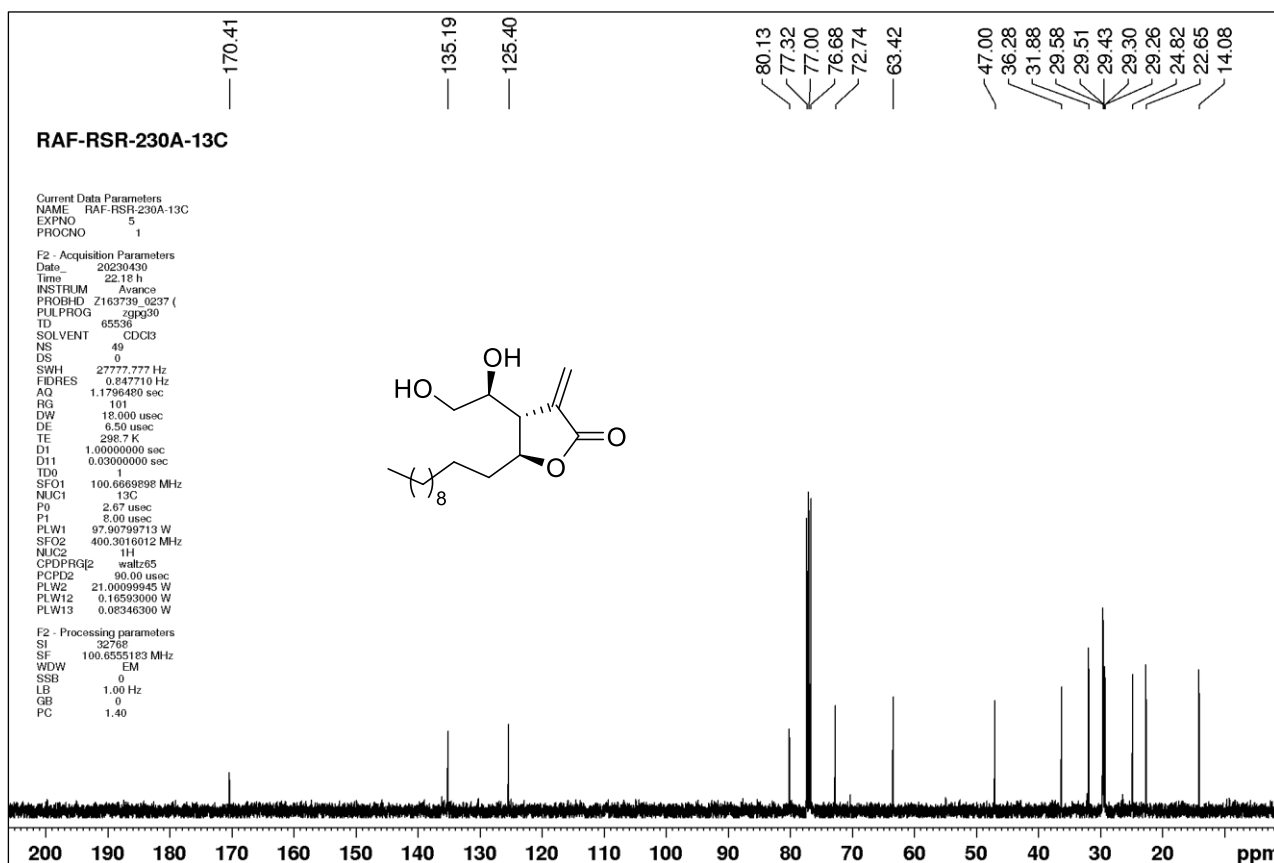

**8j:** HRMS (Q-TOF)  $m/z$ :  $[M + H]^+$  Calcd for  $C_{18}H_{33}O_4$  313.2374; Found 313.2383.

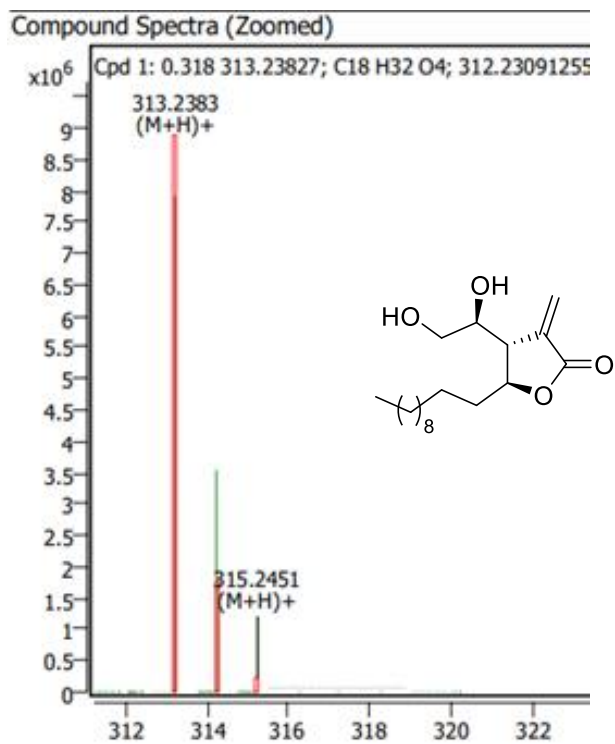

$^1\text{H}$  NMR (400 MHz,  $\text{CDCl}_3$ ) and  $^{13}\text{C}\{^1\text{H}\}$  NMR (100 MHz,  $\text{CDCl}_3$ ) of compound **8k**

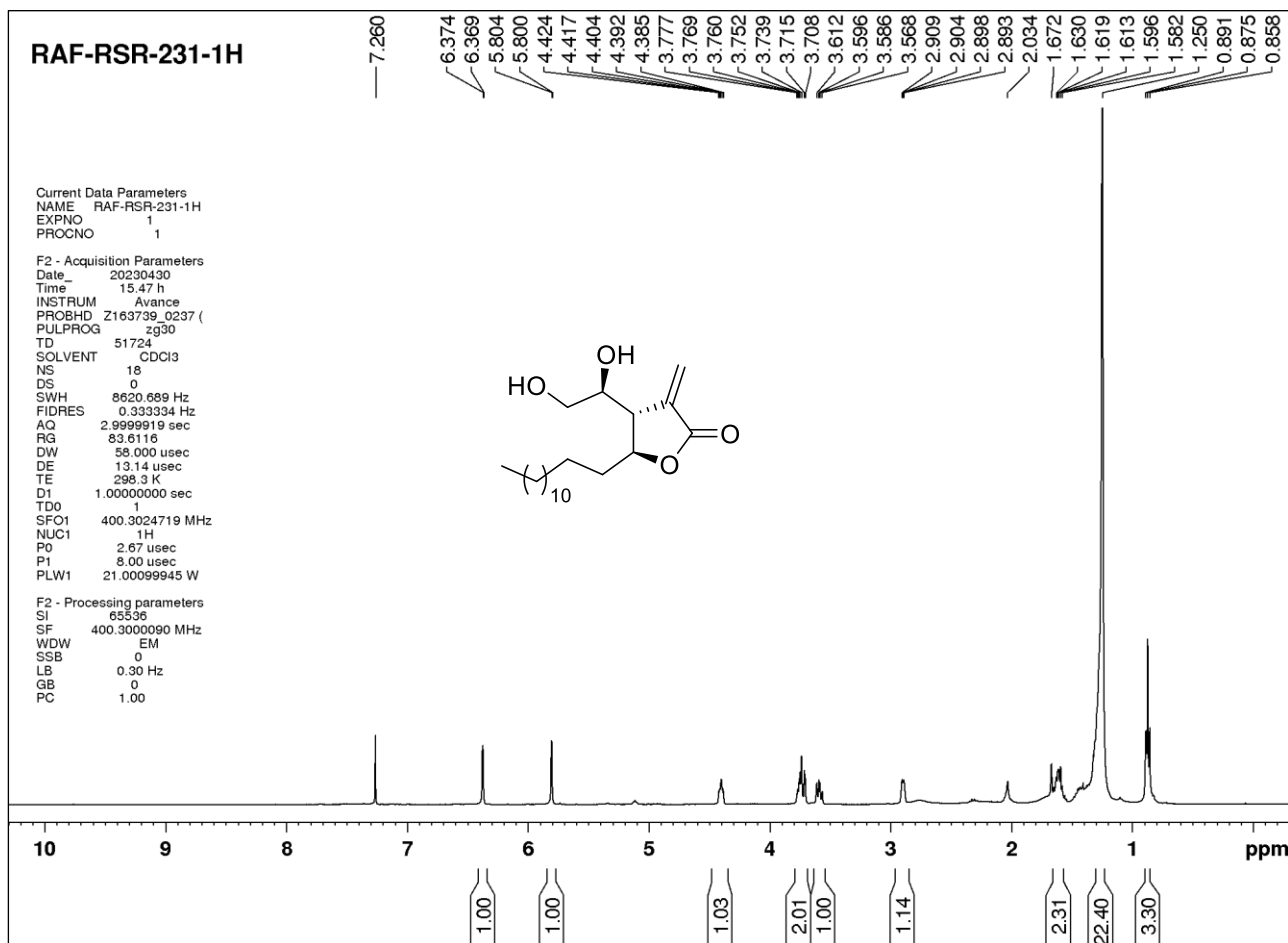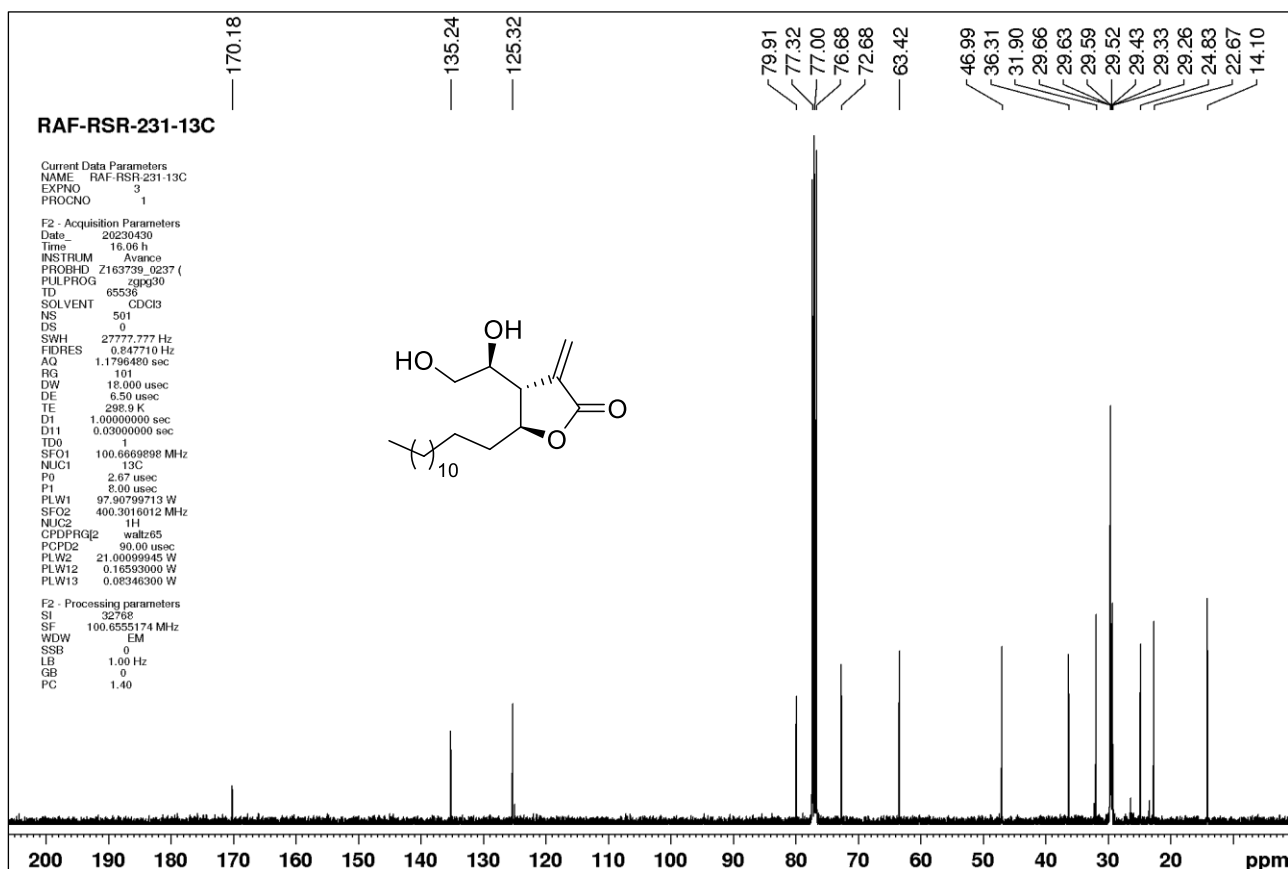

**8k:** HRMS (Q-TOF)  $m/z$ :  $[M + H]^+$  Calcd for  $C_{20}H_{37}O_4$  341.2687; Found 341.2691.

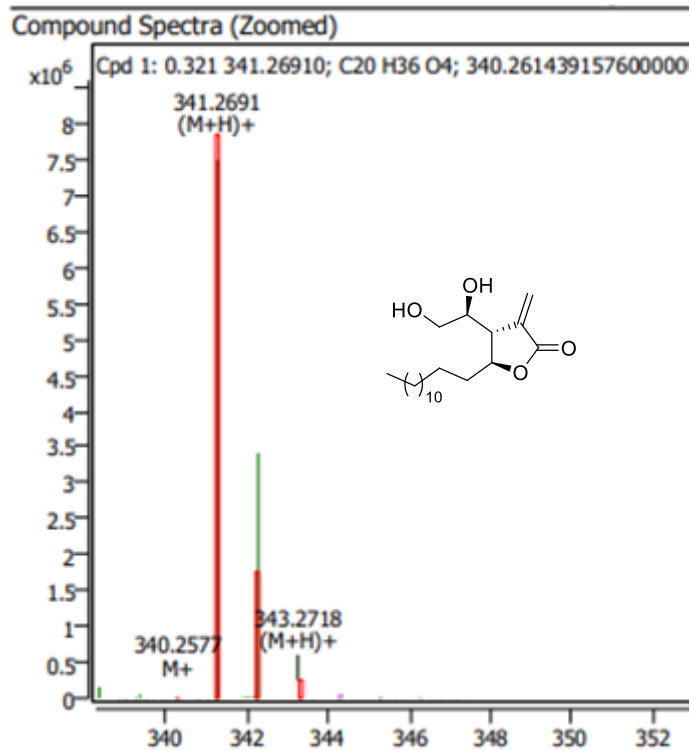

$^1\text{H}$  NMR (400 MHz,  $\text{CDCl}_3$ ) and  $^{13}\text{C}\{^1\text{H}\}$  NMR (100 MHz,  $\text{CDCl}_3$ ) of compound **11**

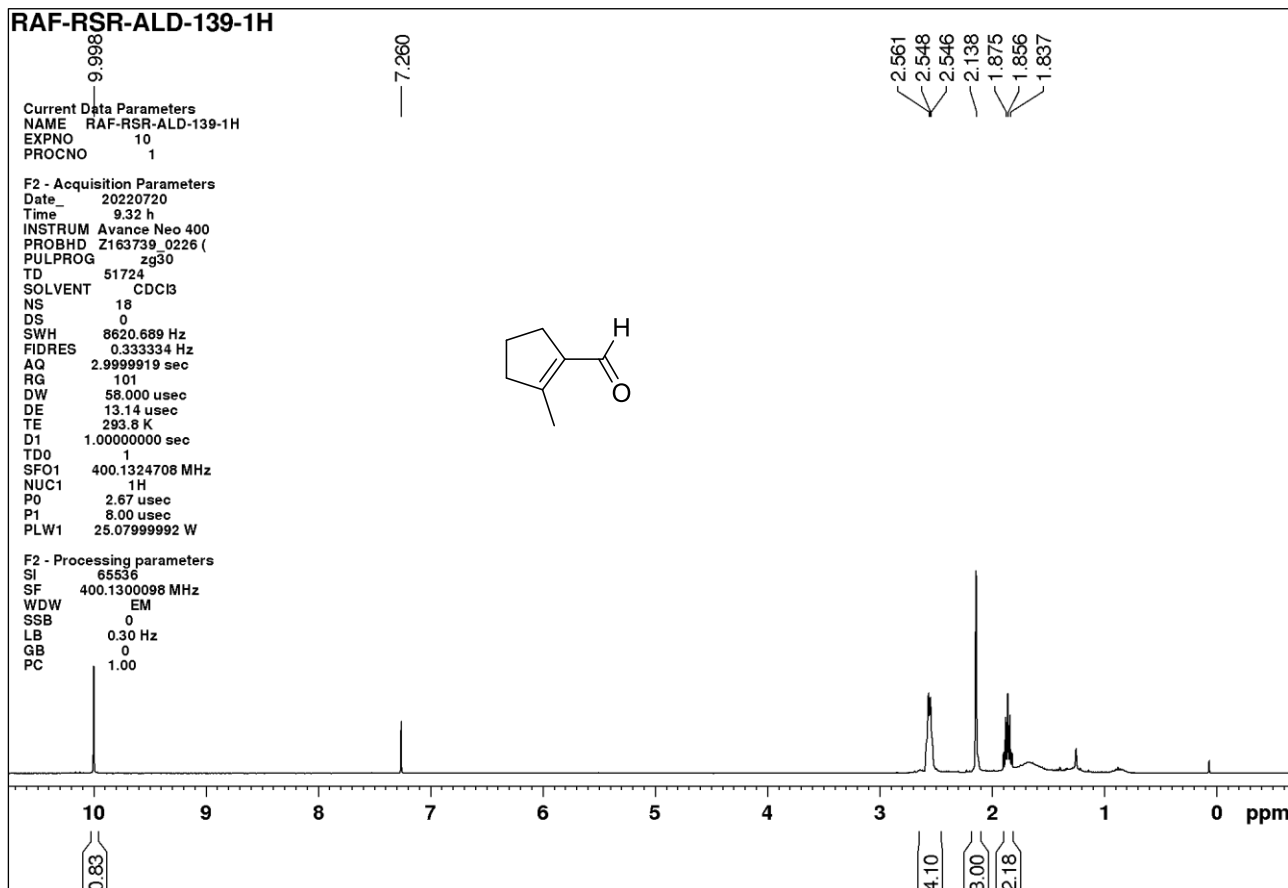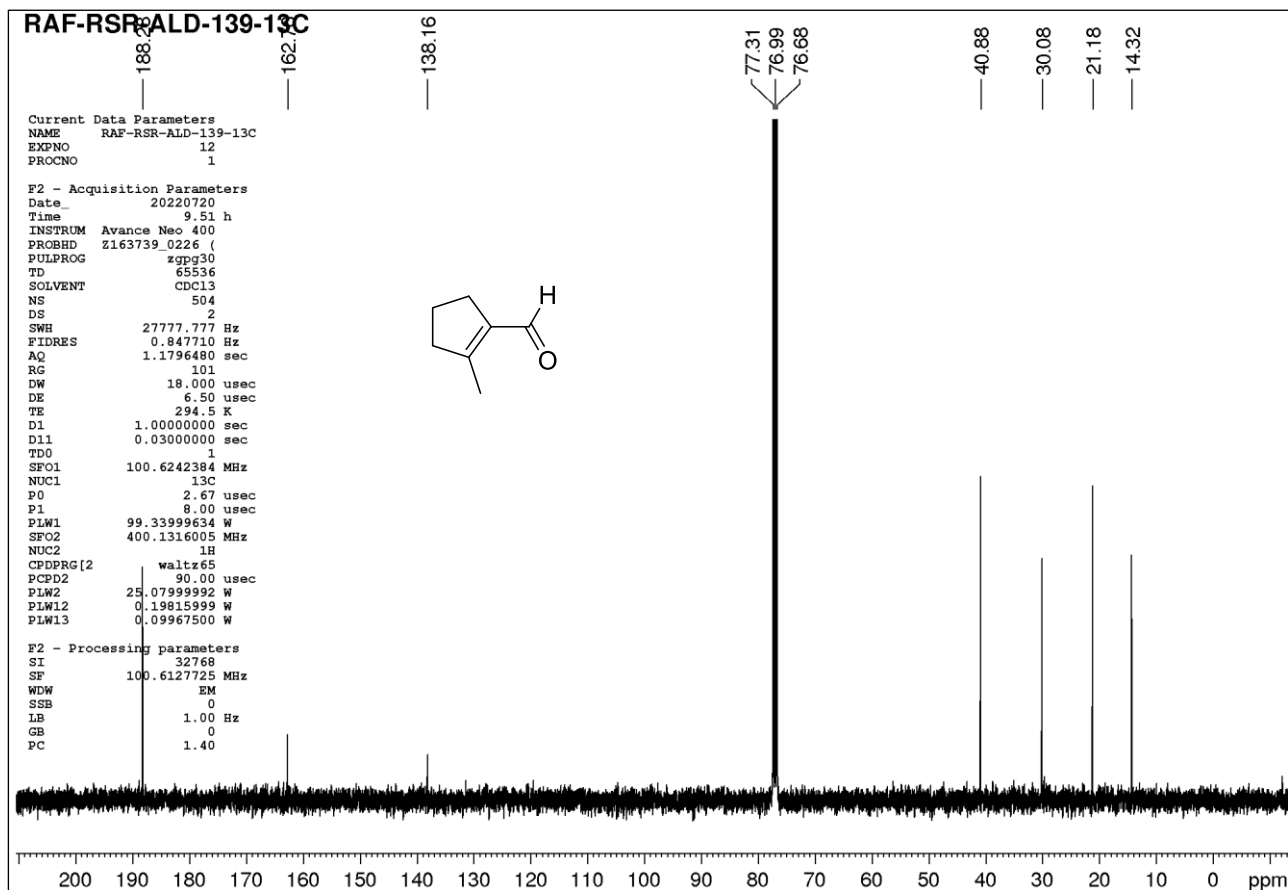



11: HRMS (Q-TOF)  $m/z$ :  $[M + H]^+$  Calcd for  $C_7H_{11}O$  111.0809; Found 111.0806

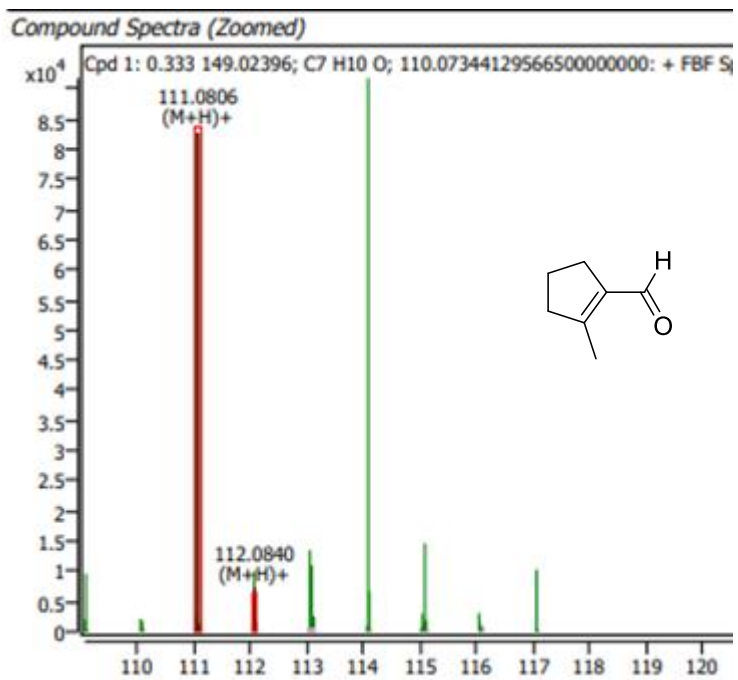

<sup>1</sup>H NMR (400 MHz, CDCl<sub>3</sub>) and <sup>13</sup>C{<sup>1</sup>H} NMR (100 MHz, CDCl<sub>3</sub>) of compound **12**

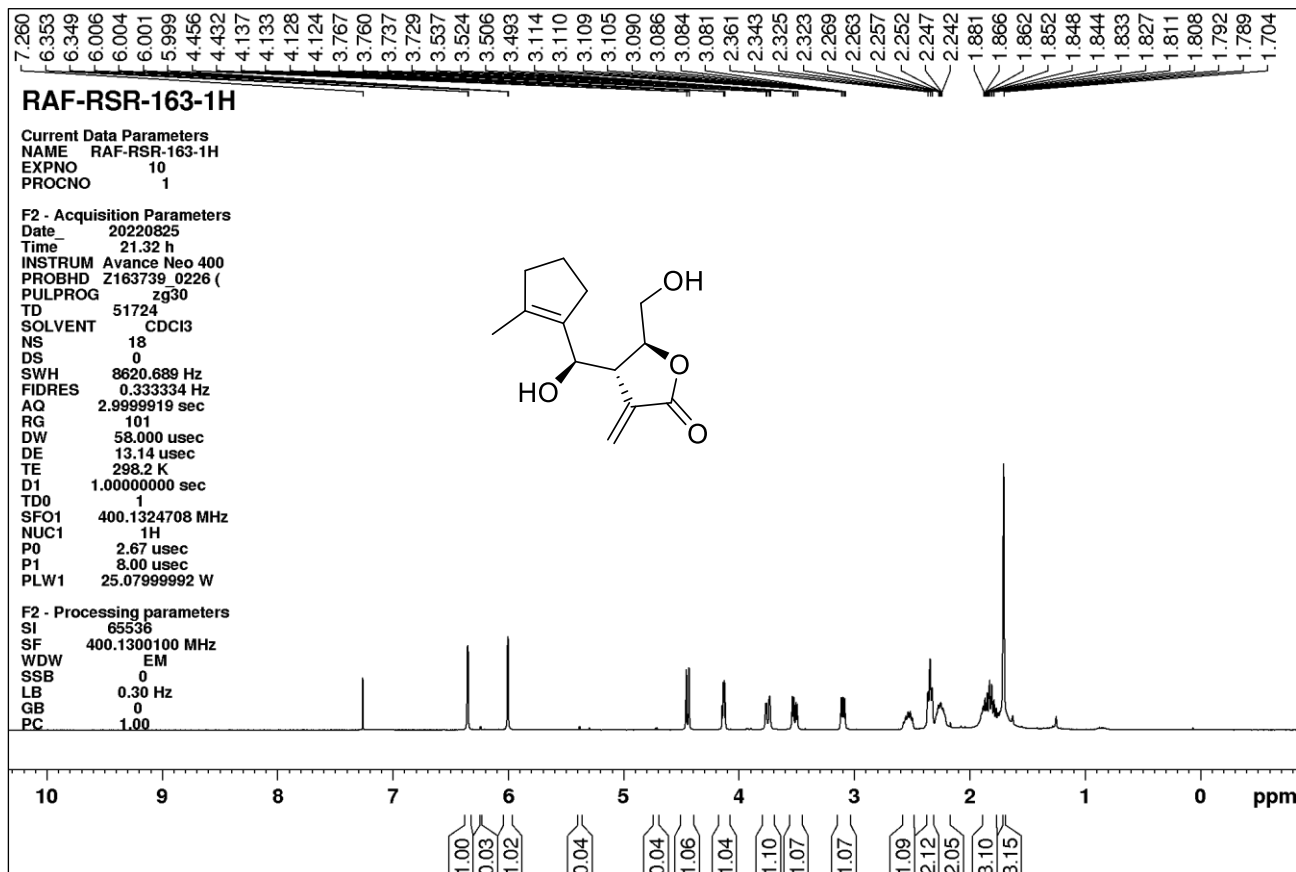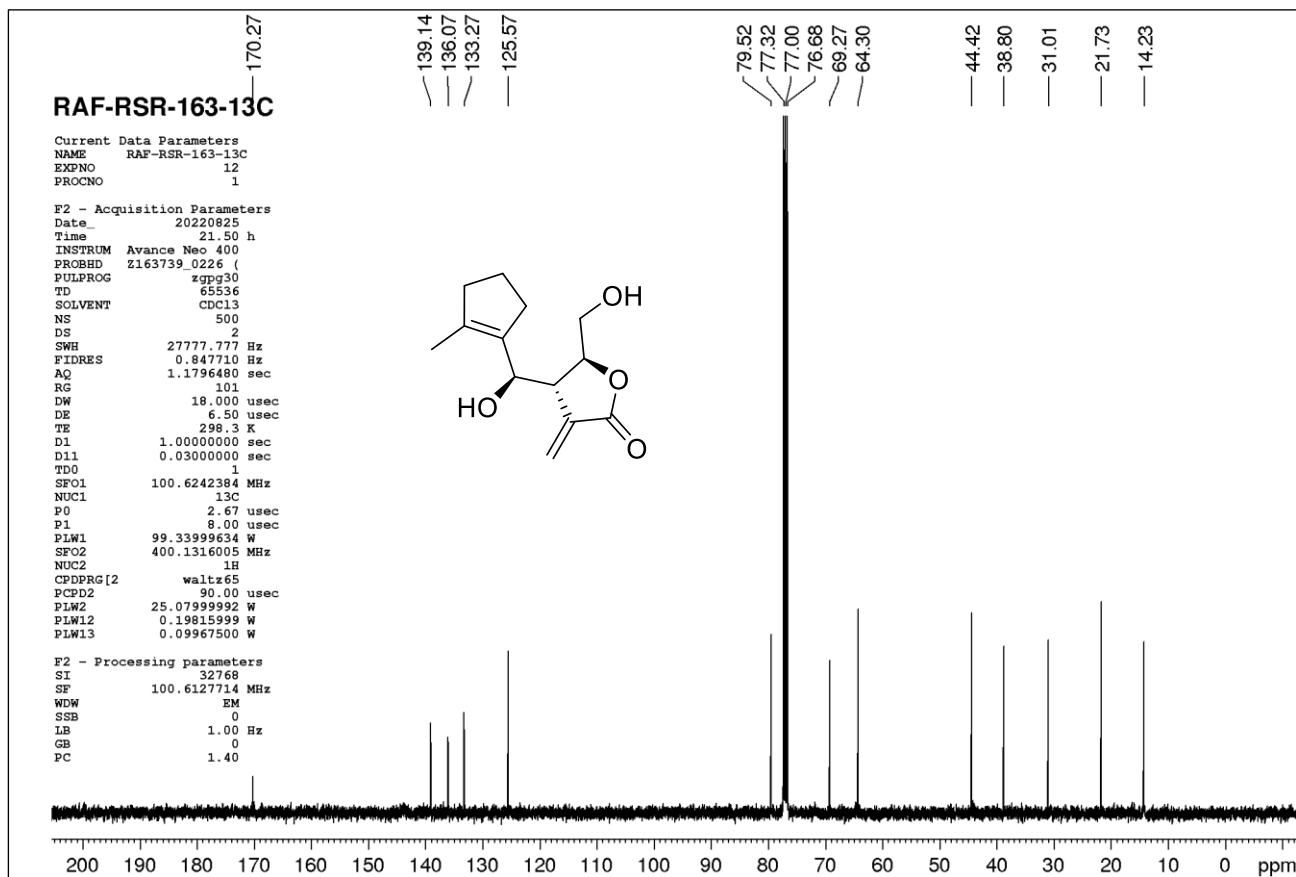

12: HRMS (Q-TOF)  $m/z$ :  $[M + H]^+$  Calcd for  $C_{13}H_{19}O_4$  239.1278; Found 239.1274.

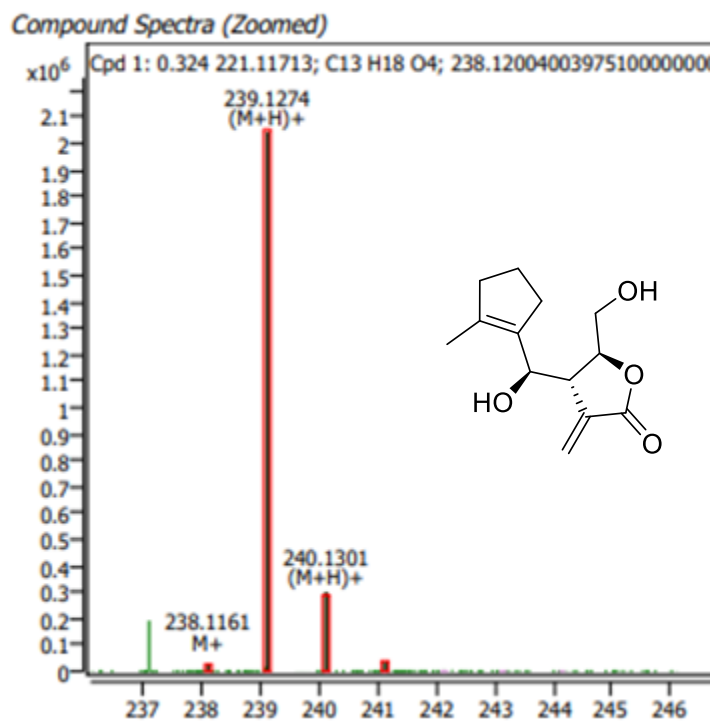

$^1\text{H}$  NMR (400 MHz,  $\text{CDCl}_3$ ) and  $^{13}\text{C}\{^1\text{H}\}$  NMR (100 MHz,  $\text{CDCl}_3$ ) of compound **13**

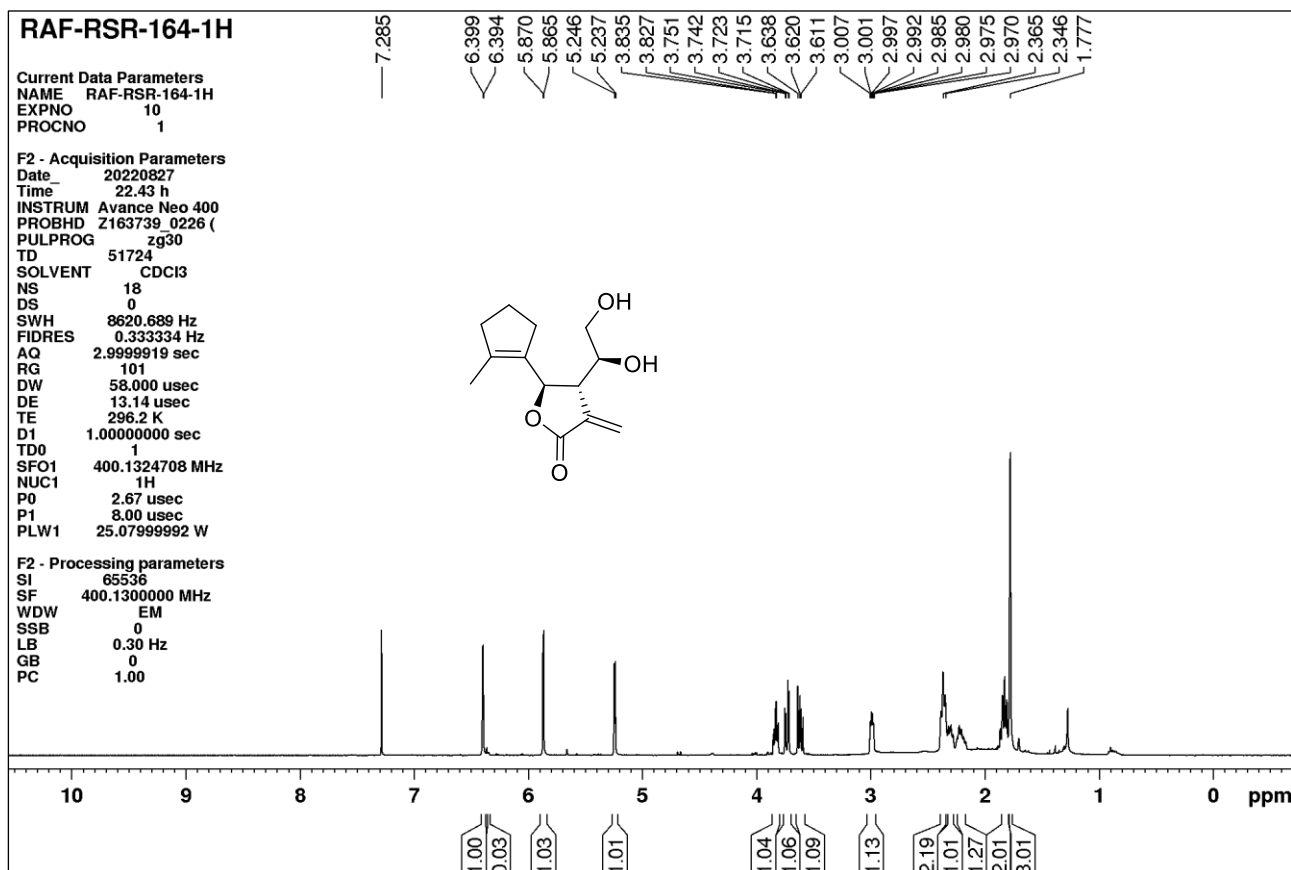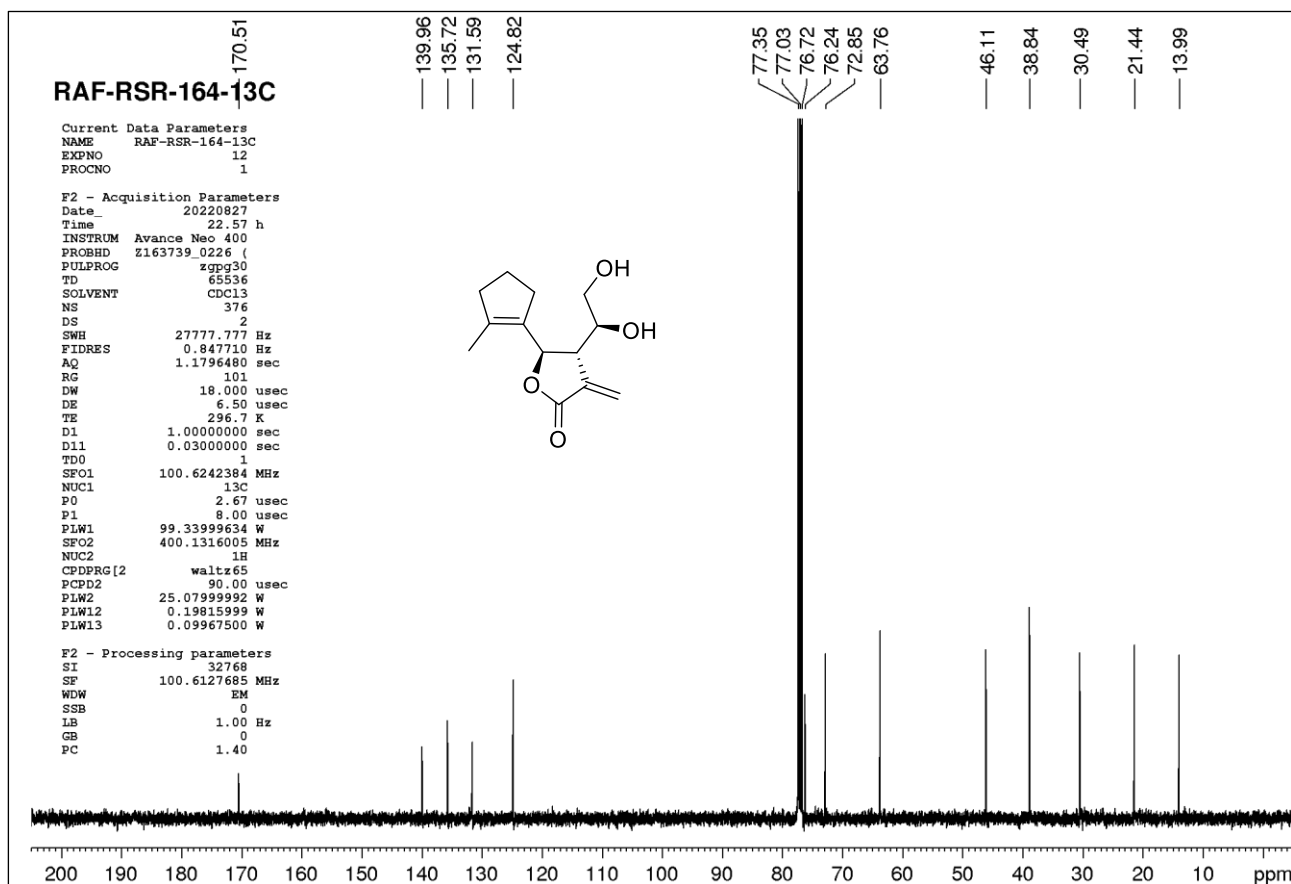

13: HRMS (Q-TOF)  $m/z$ :  $[M + Na]^+$  Calcd for  $C_{13}H_{18}O_4Na$  261.1098; Found 261.1090.

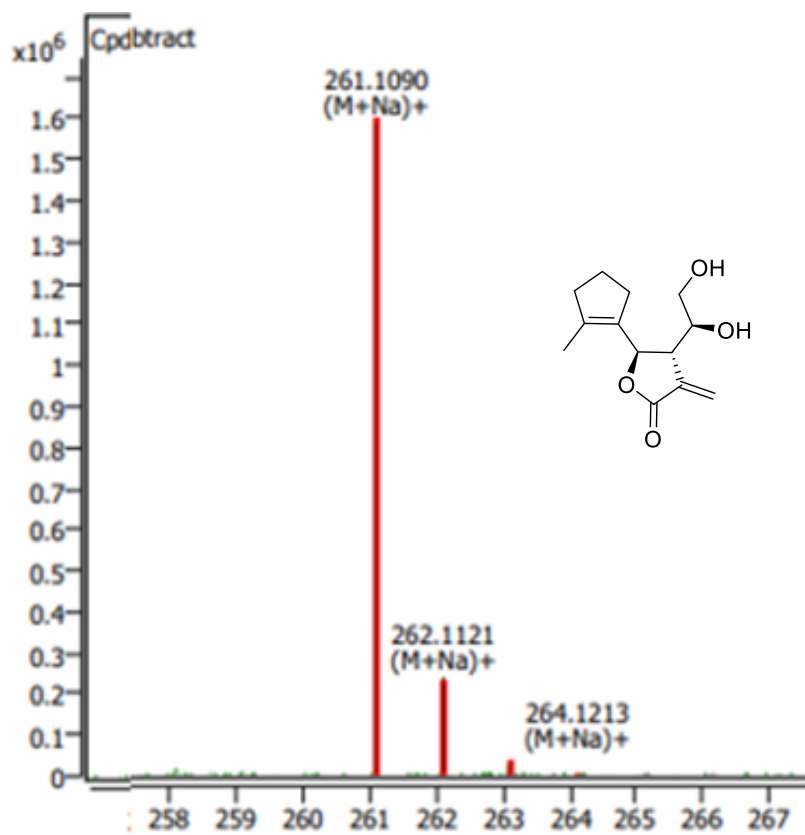

$^1\text{H}$  NMR (500 MHz,  $\text{CDCl}_3$ ) and  $^{13}\text{C}\{^1\text{H}\}$  NMR (125 MHz,  $\text{CDCl}_3$ ) of compound **14**

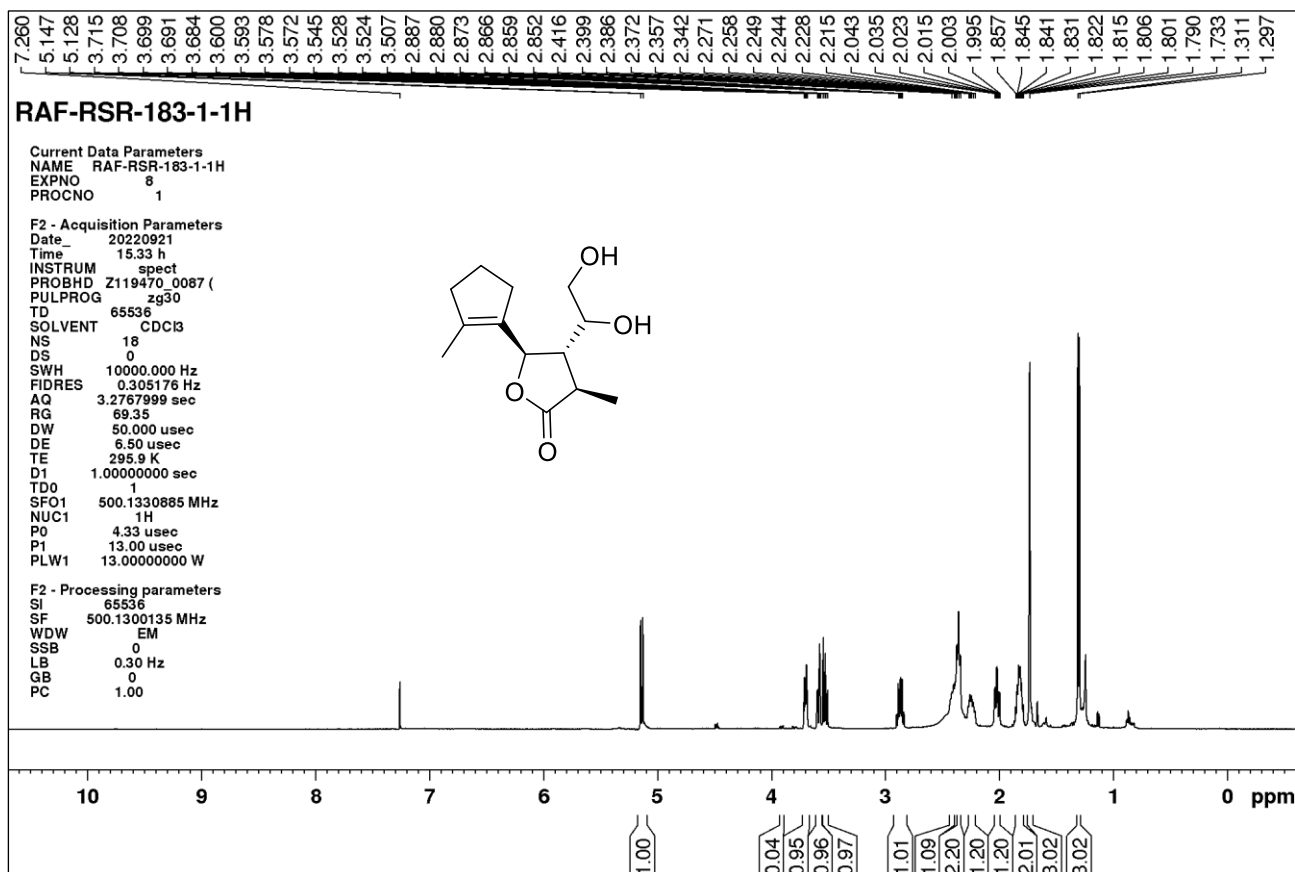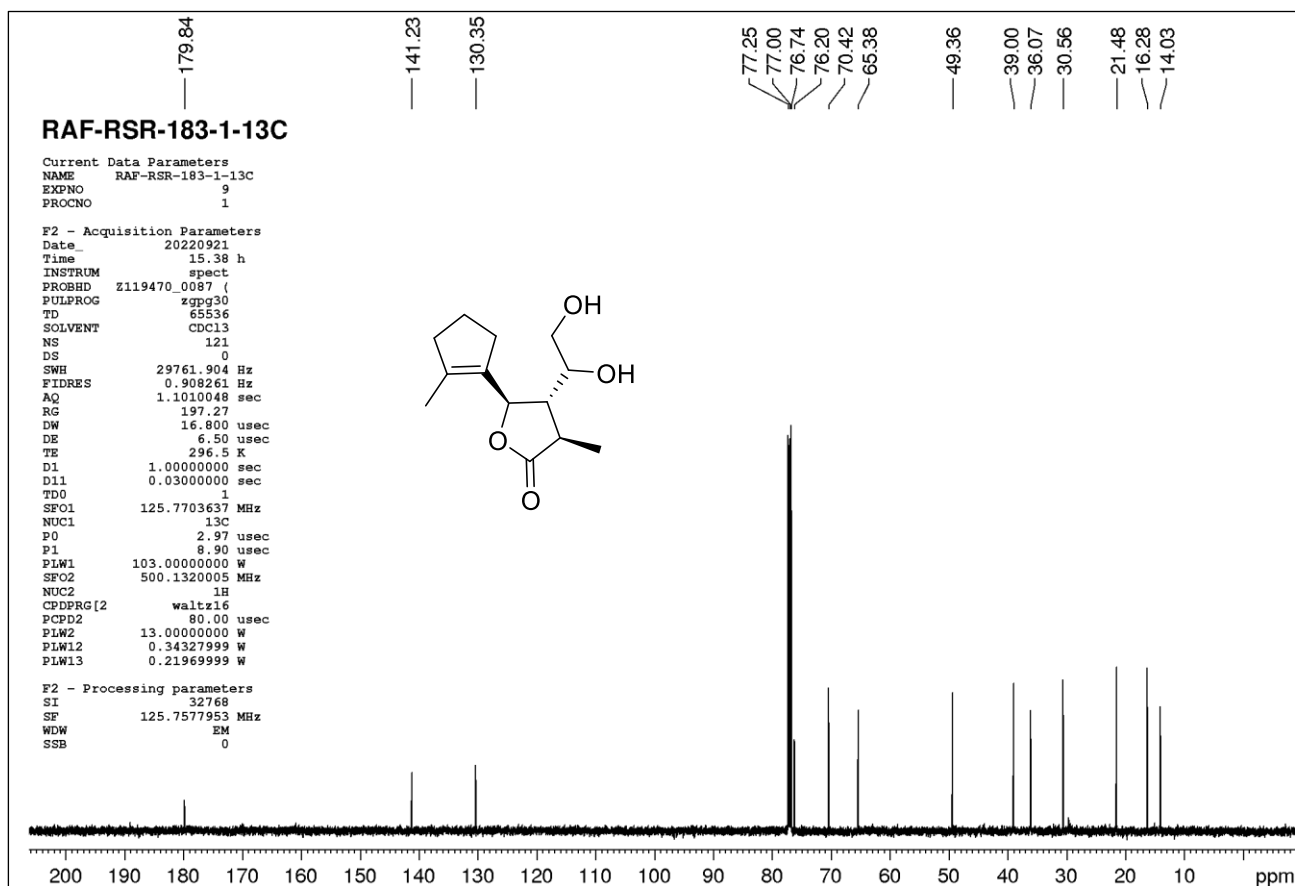

14: HRMS (Q-TOF)  $m/z$ :  $[M + H]^+$  Calcd for  $C_{13}H_{21}O_4$  241.1433; Found 241.1419.

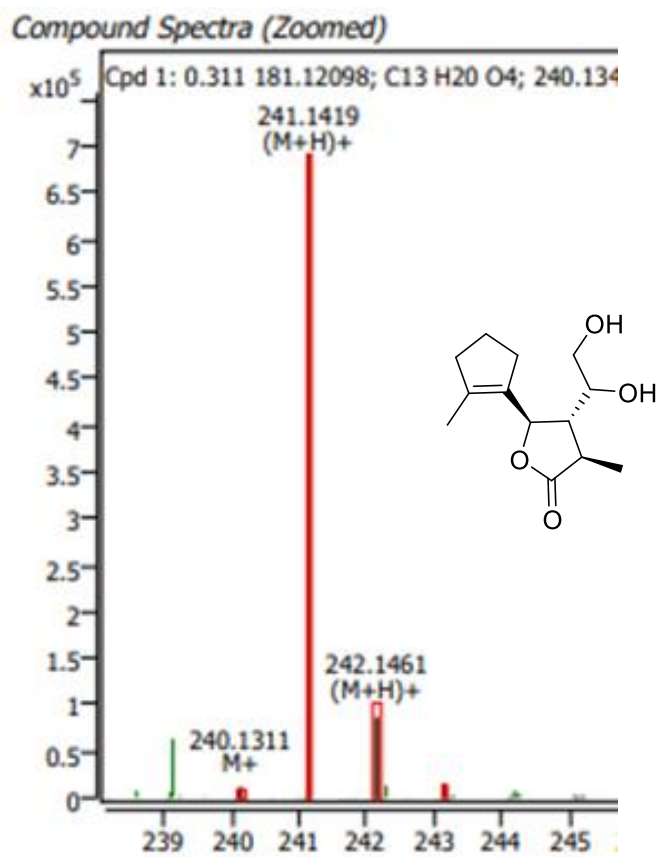

$^1\text{H}$  NMR (400 MHz,  $\text{CDCl}_3$ ) and  $^{13}\text{C}\{^1\text{H}\}$  NMR (100 MHz,  $\text{CDCl}_3$ ) of compound **16**

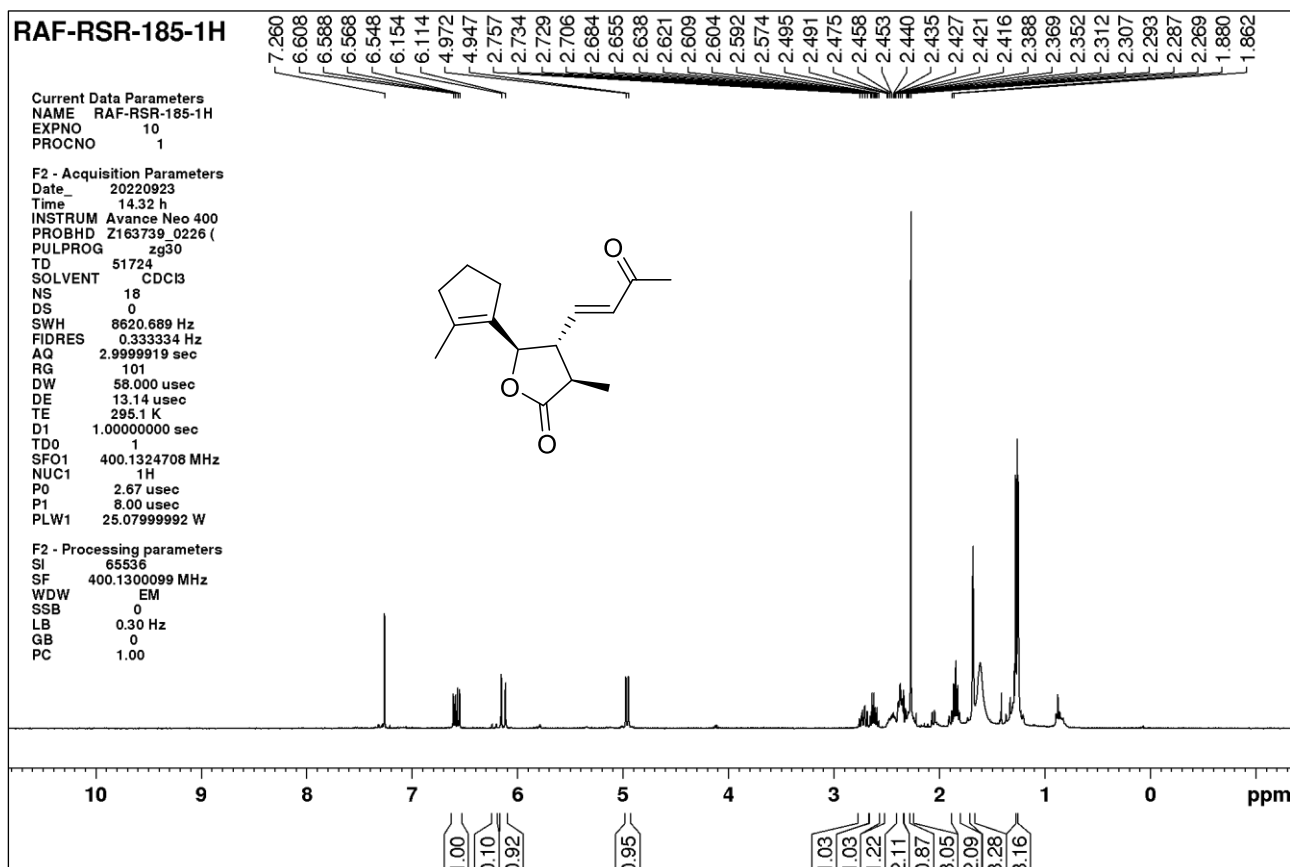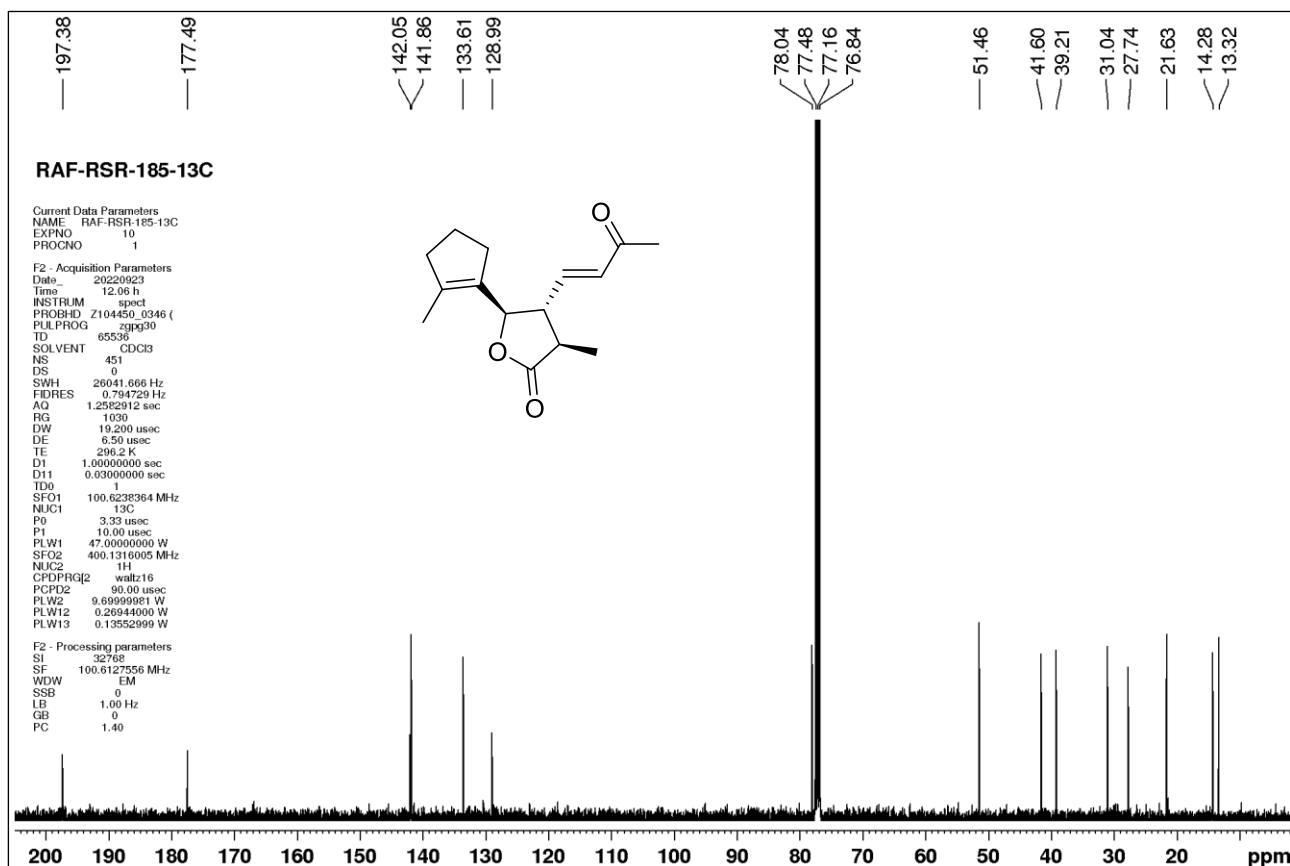



COSY (400 MHz, CDCl<sub>3</sub>) and NOESY (400 MHz, CDCl<sub>3</sub>) of compound **16**

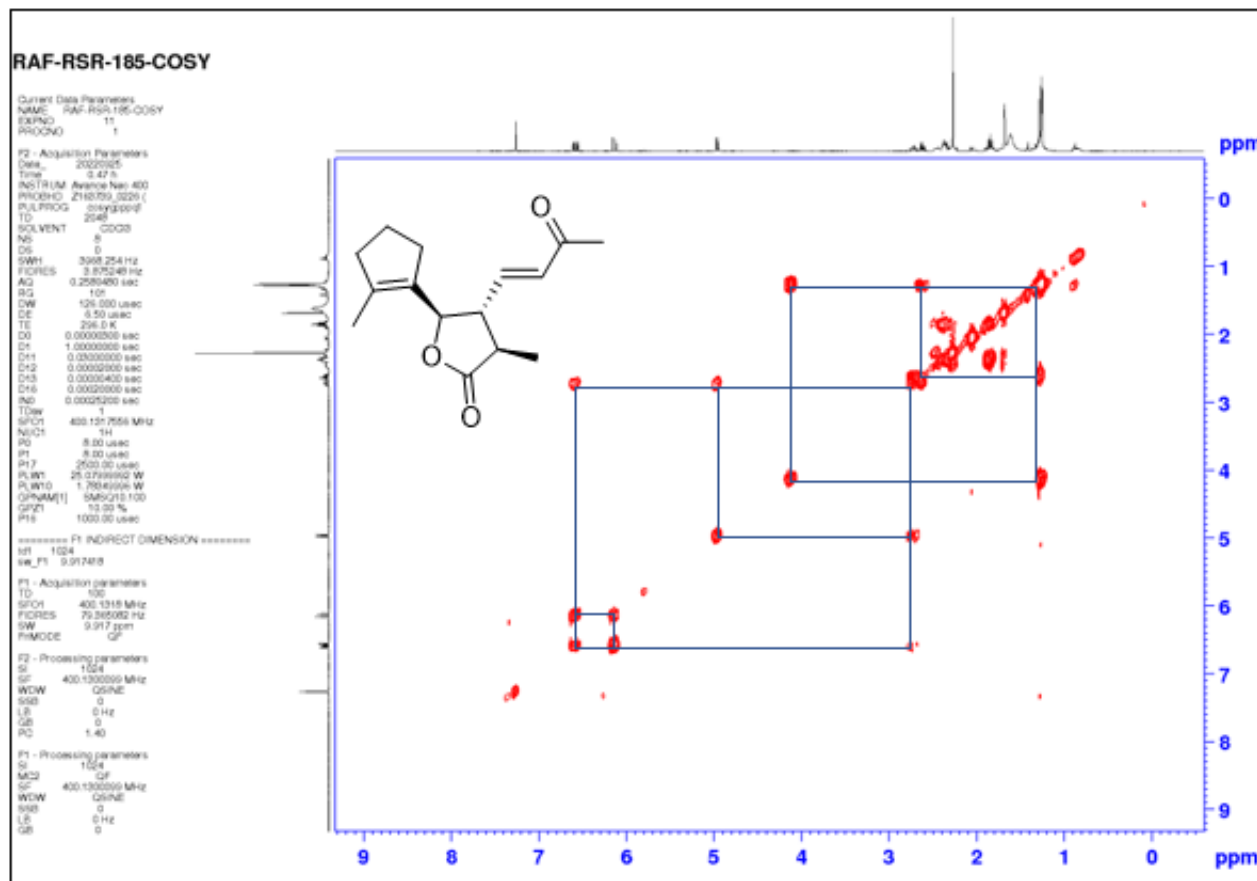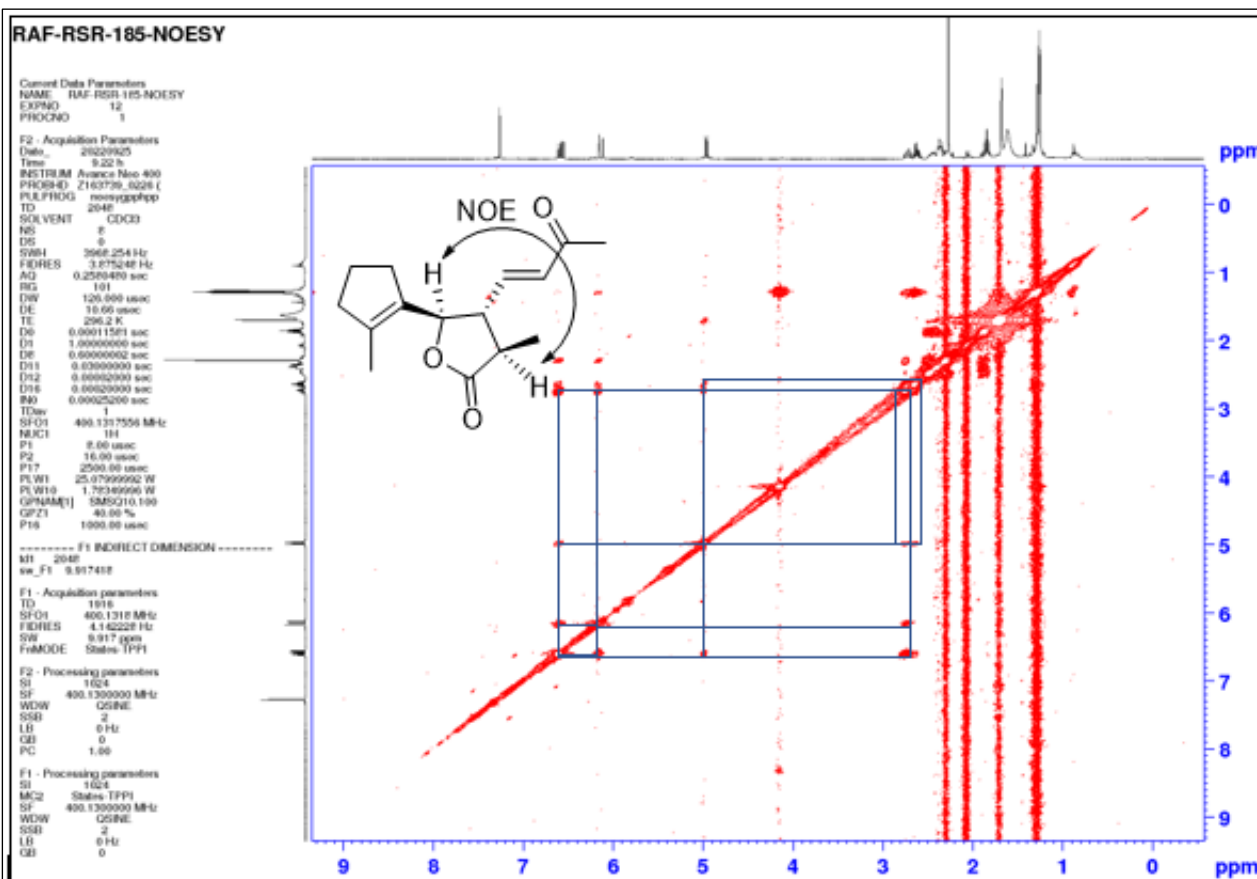

16: HRMS (Q-TOF)  $m/z$ :  $[M + H]^+$  Calcd for  $C_{15}H_{21}O_3$  249.1486; Found 249.1472.

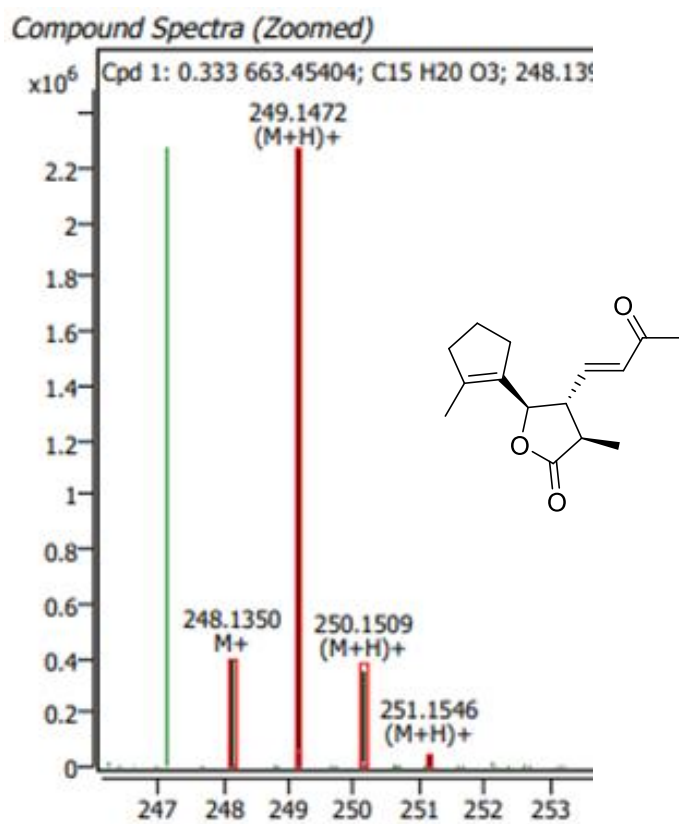

$^1\text{H}$  NMR (500 MHz,  $\text{CDCl}_3$ ) and  $^{13}\text{C}\{^1\text{H}\}$  NMR (125 MHz,  $\text{CDCl}_3$ ) of compound 17

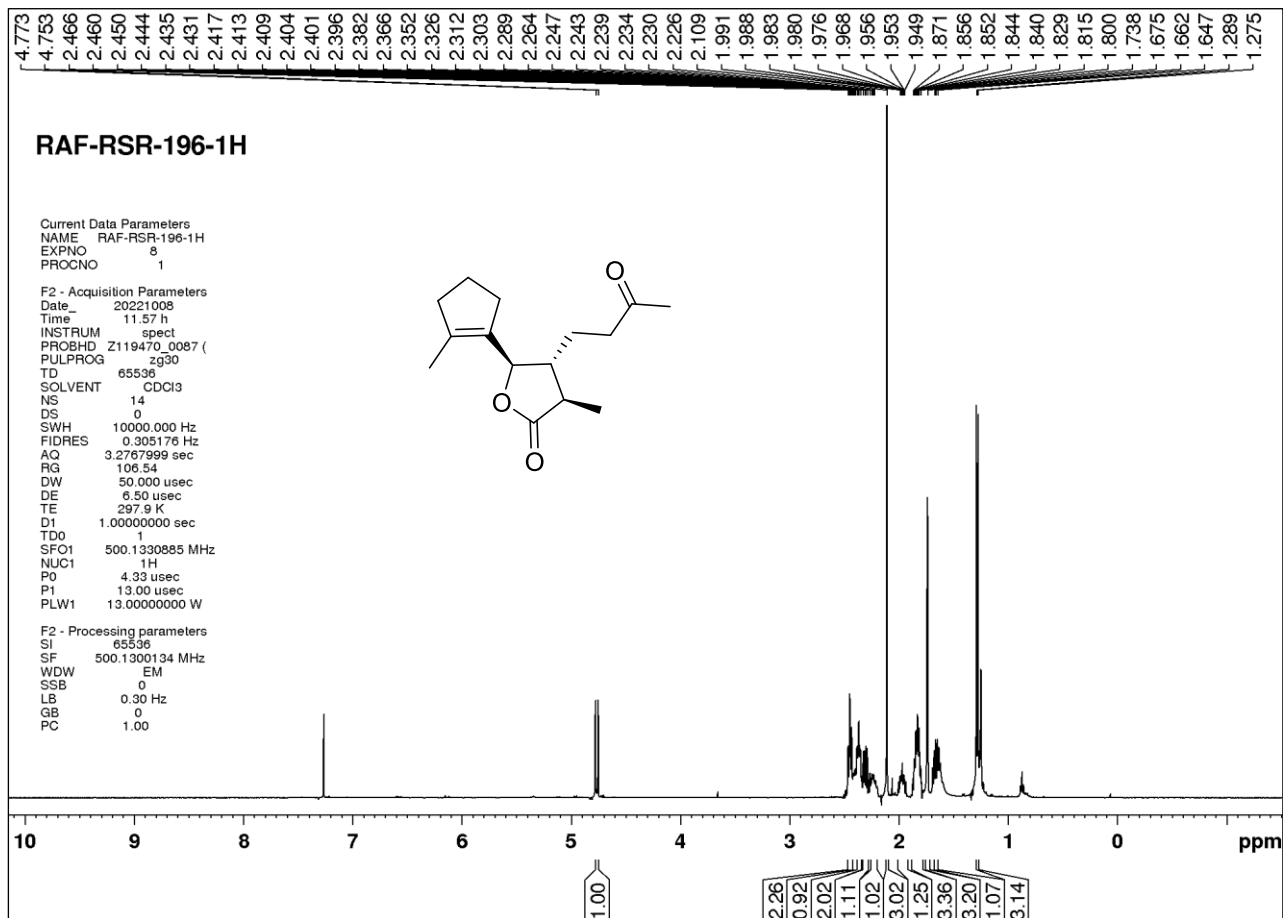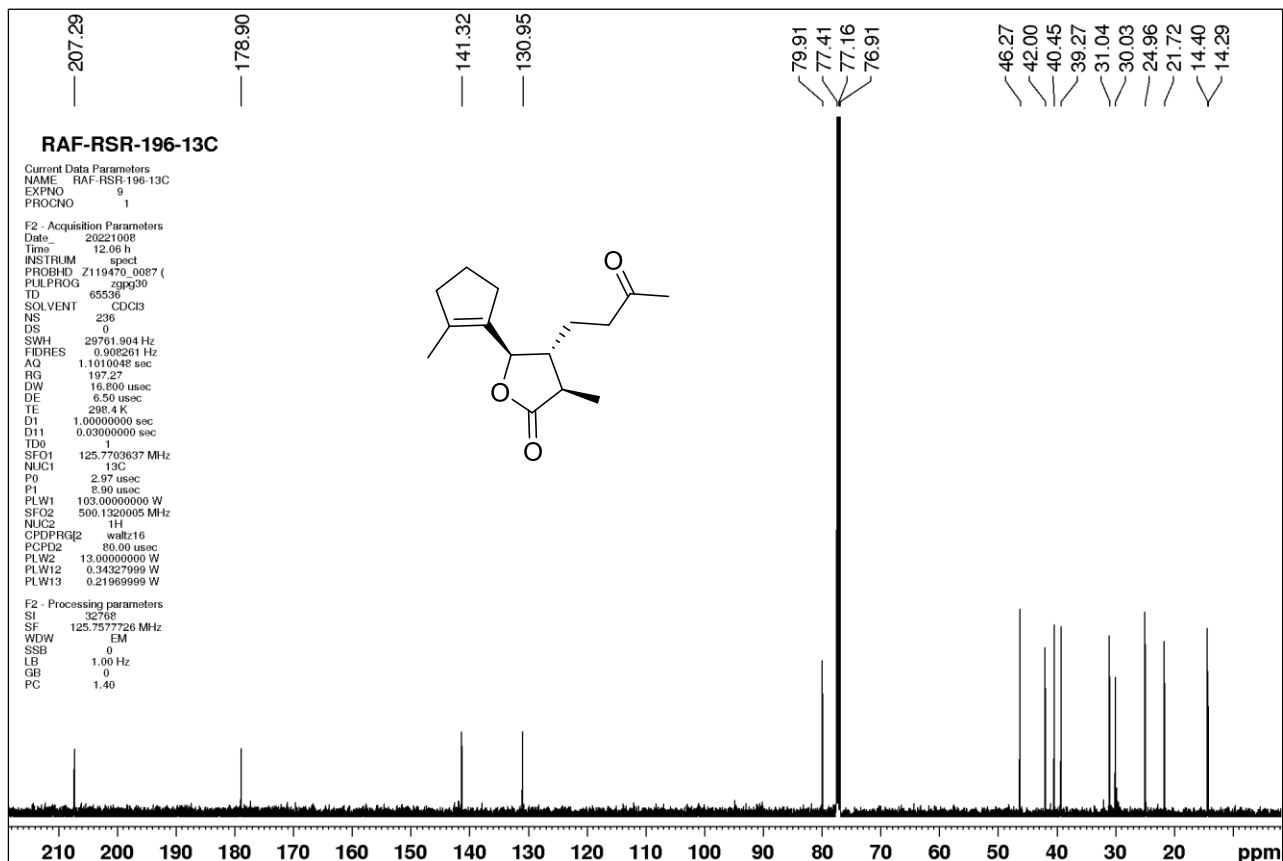

COSY (400 MHz, CDCl<sub>3</sub>) and NOESY (400 MHz, CDCl<sub>3</sub>) of compound **17**

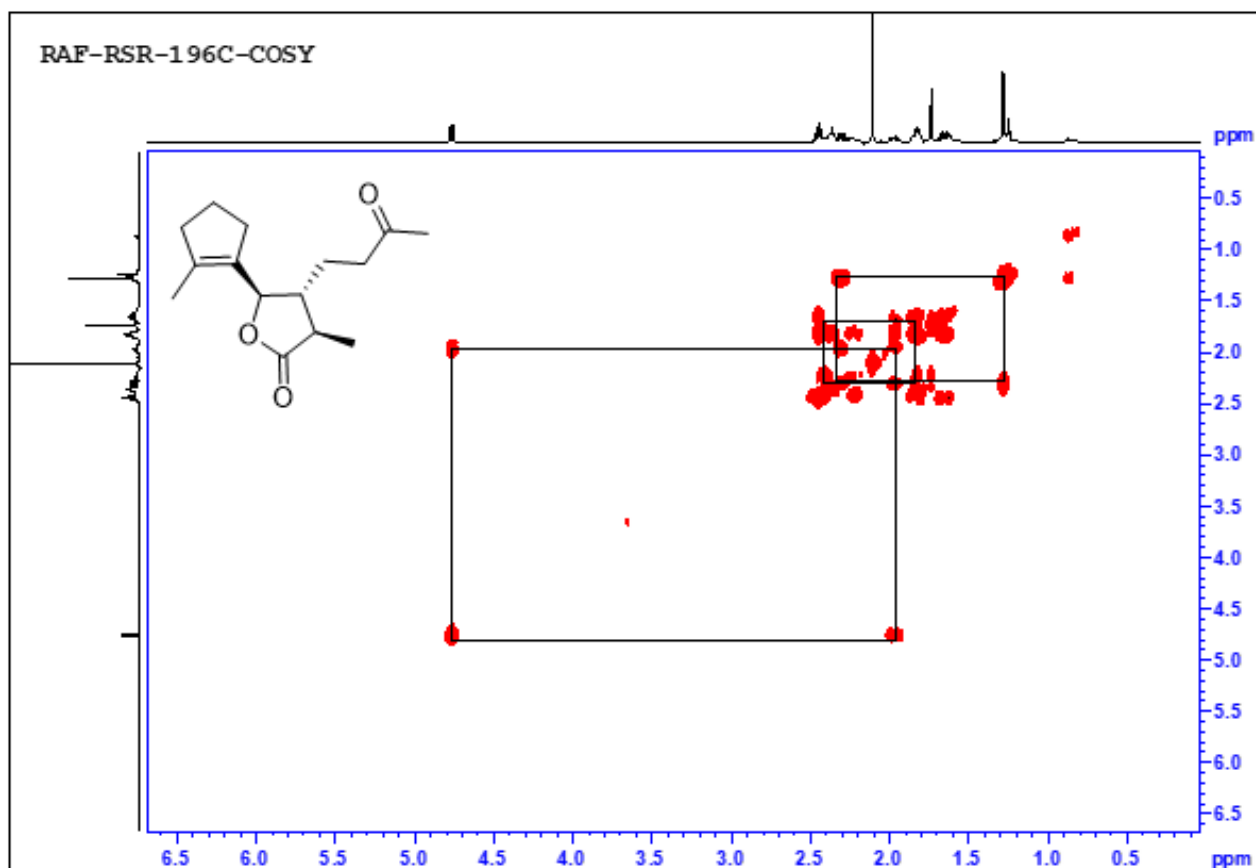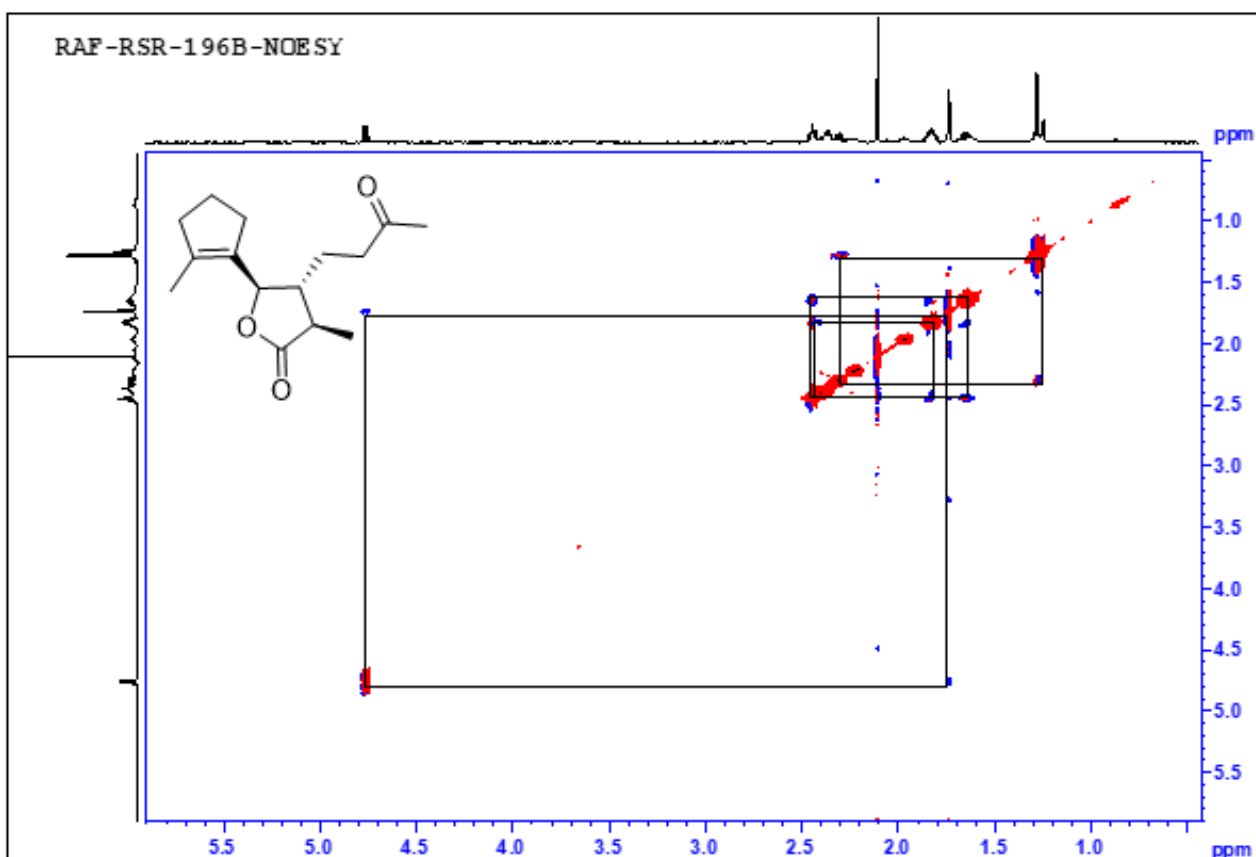

17: HRMS (ESI-TOF)  $m/z$ :  $[M + Na]^+$  Calcd for  $C_{15}H_{22}O_3Na$  273.1461; Found 273.1455.

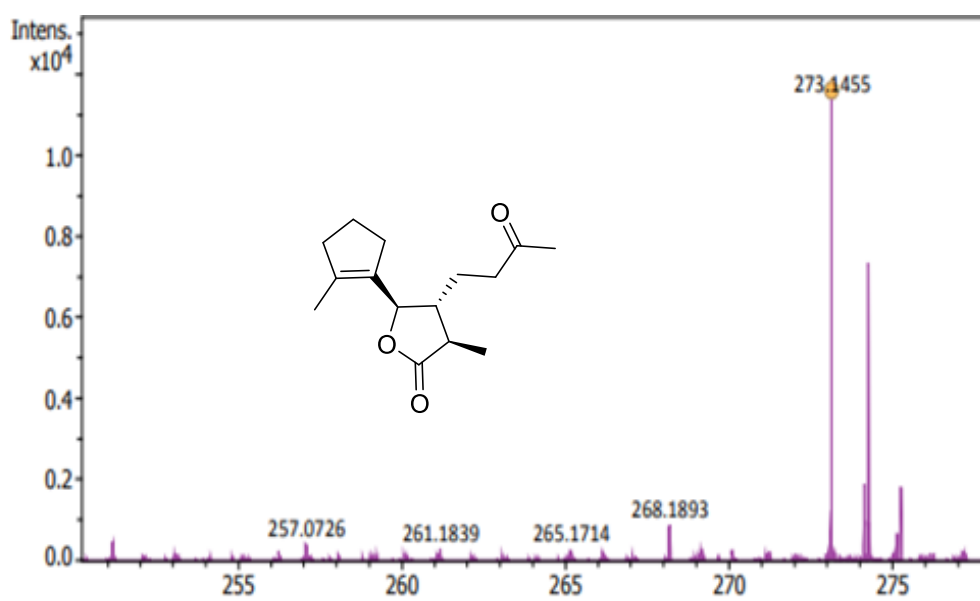

<sup>1</sup>H NMR (500 MHz, CDCl<sub>3</sub>) and <sup>13</sup>C{<sup>1</sup>H} NMR (125 MHz, CDCl<sub>3</sub>) of compound *ent-2a*

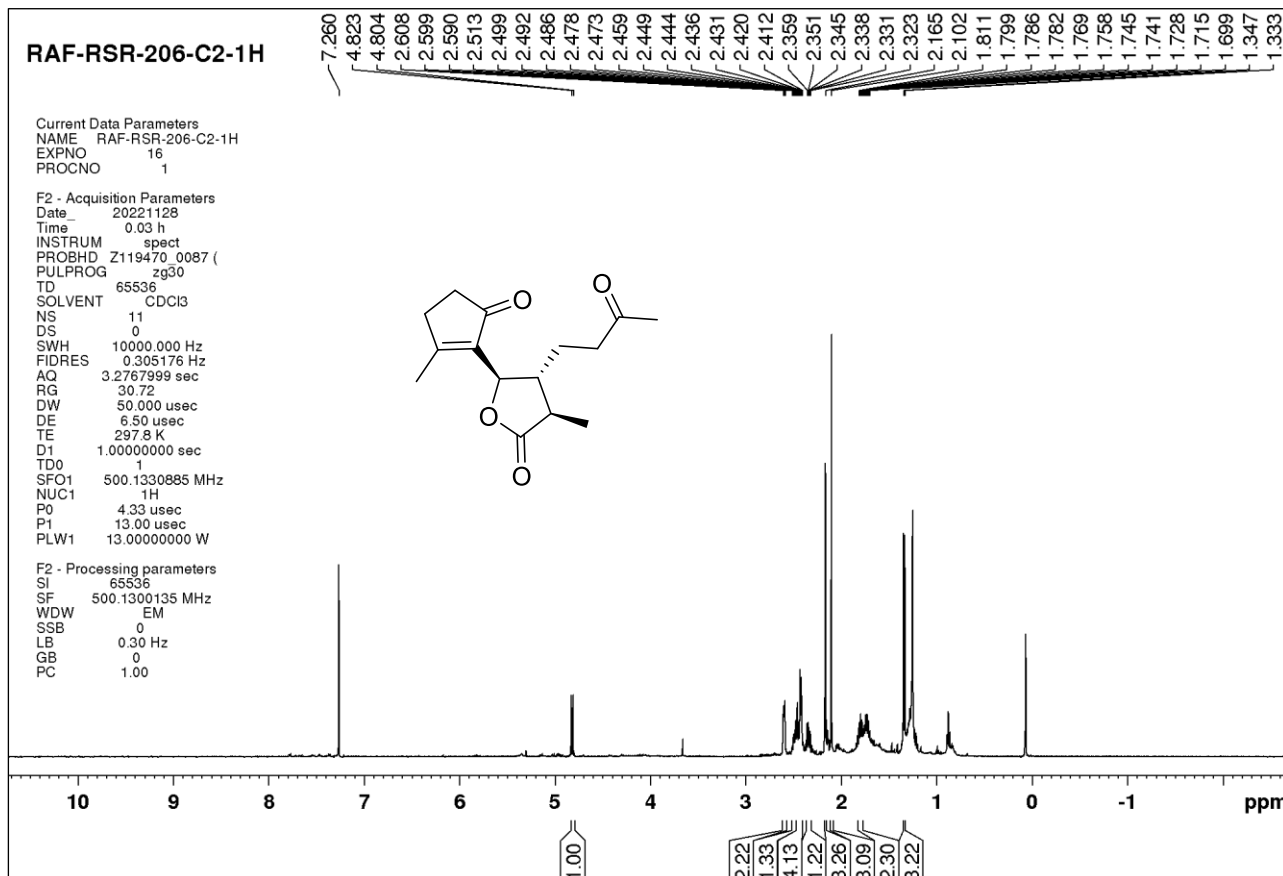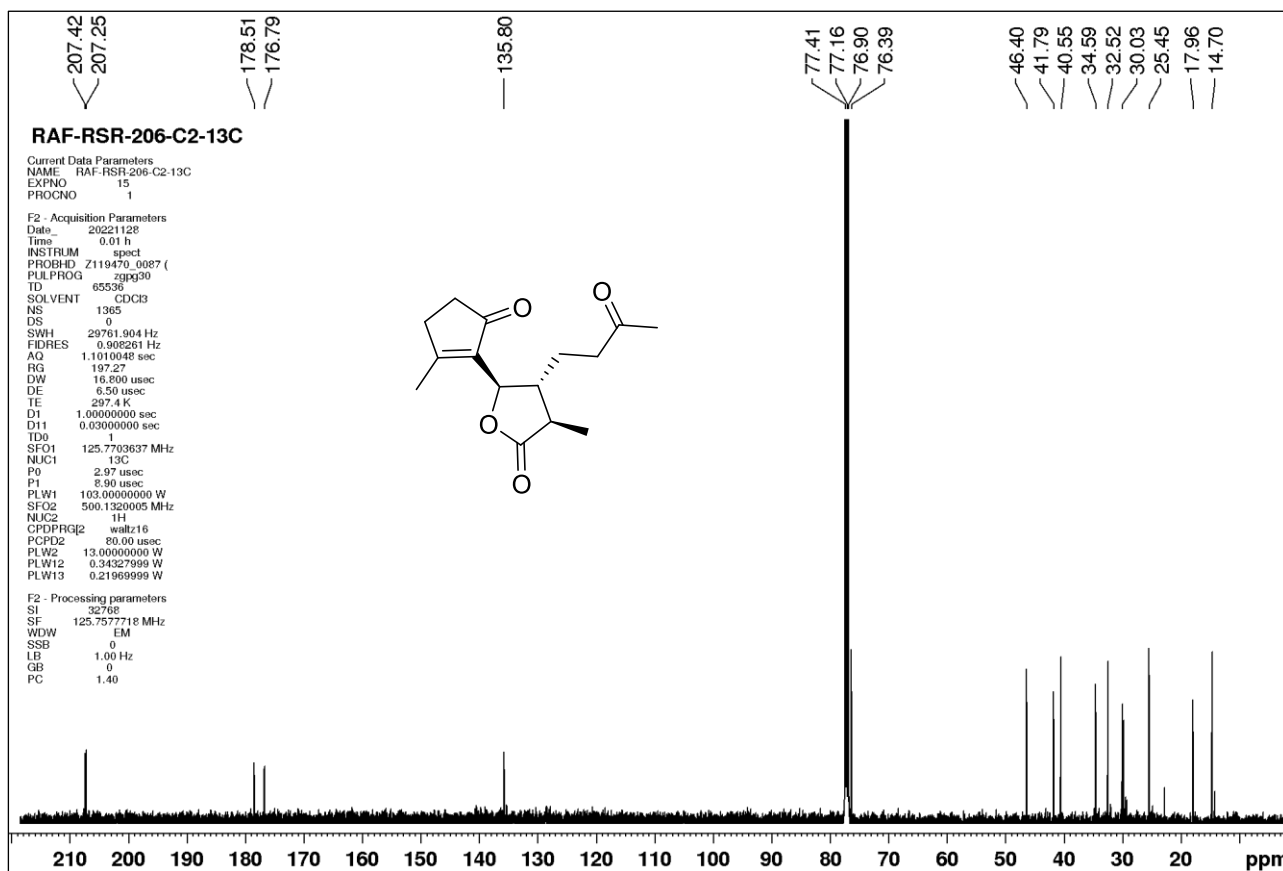

COSY (400 MHz, CDCl<sub>3</sub>) and NOESY (400 MHz, CDCl<sub>3</sub>) of compound *ent-2a*

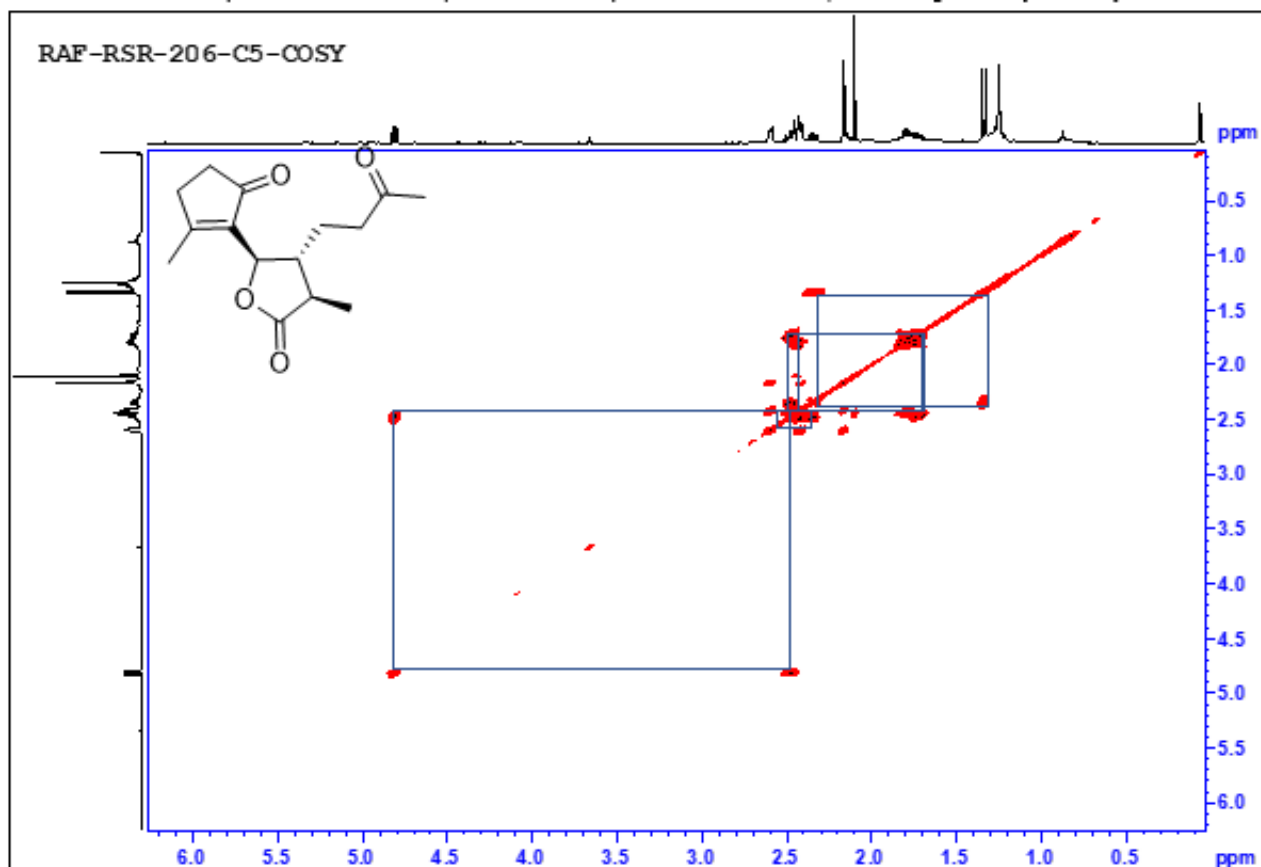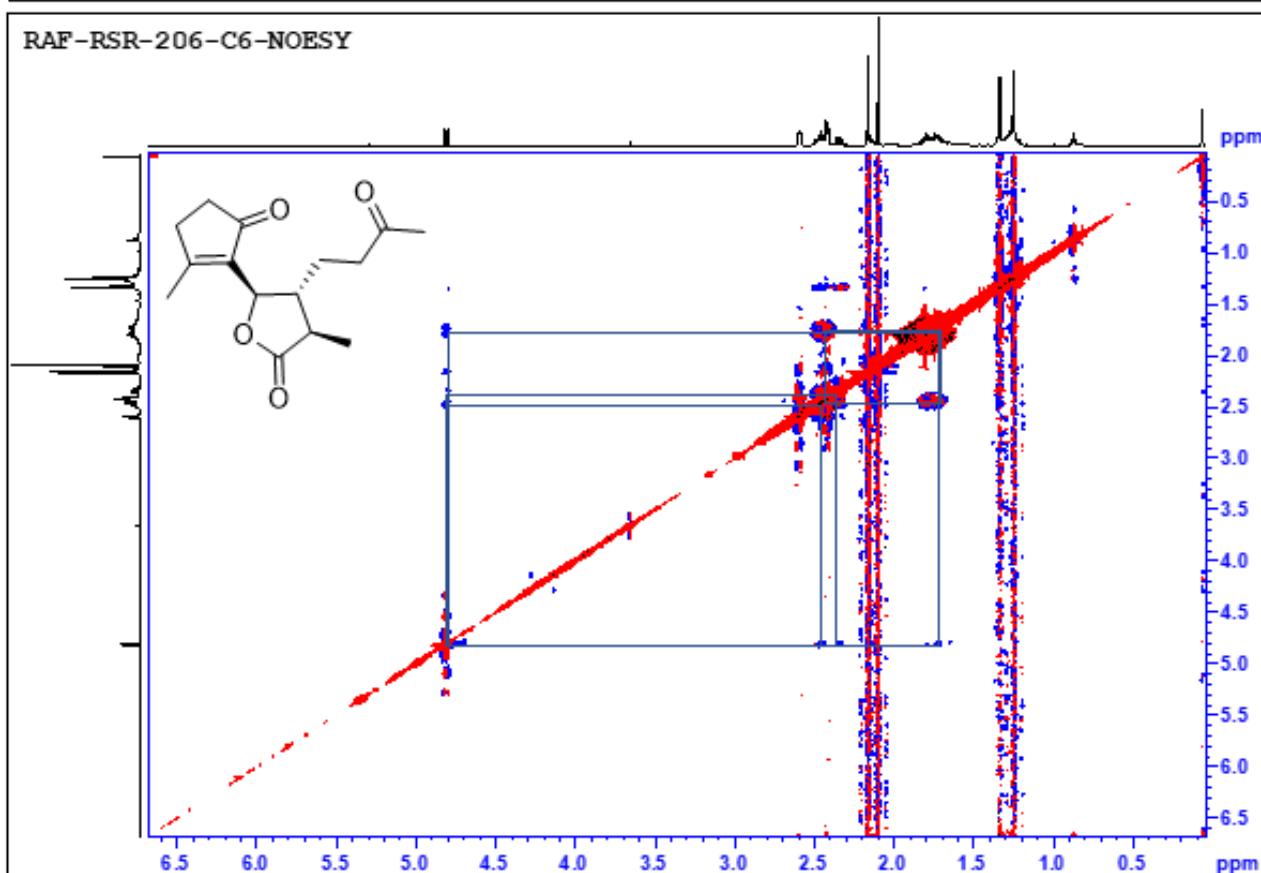

*ent*-**2a**: HRMS (ESI-TOF)  $m/z$ :  $[M + H]^+$  Calcd for  $C_{15}H_{21}O_4$  265.1435; Found 265.1431.

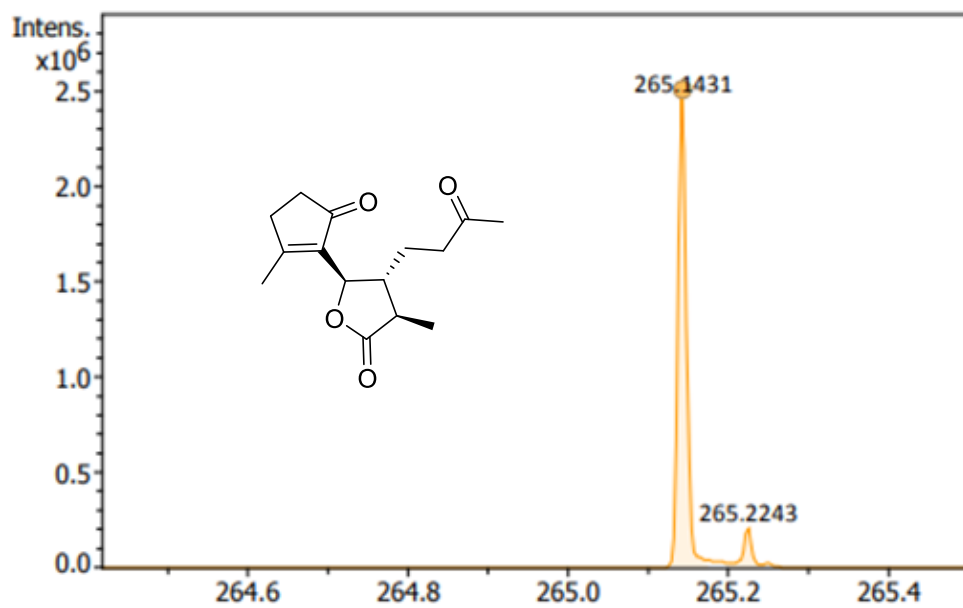



<sup>1</sup>H NMR (500 MHz, CDCl<sub>3</sub>) and <sup>13</sup>C{<sup>1</sup>H} NMR (125 MHz, CDCl<sub>3</sub>) of compound **18**

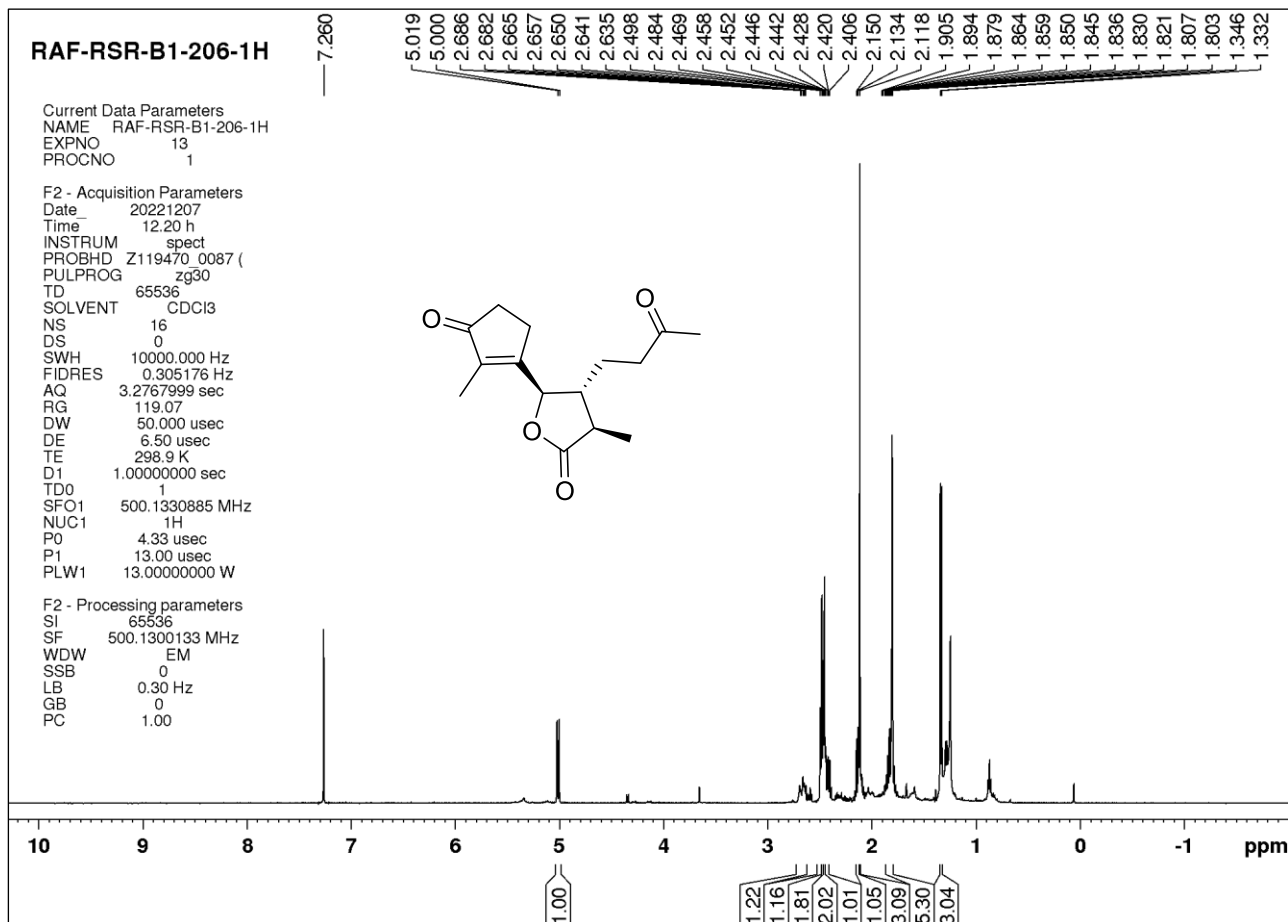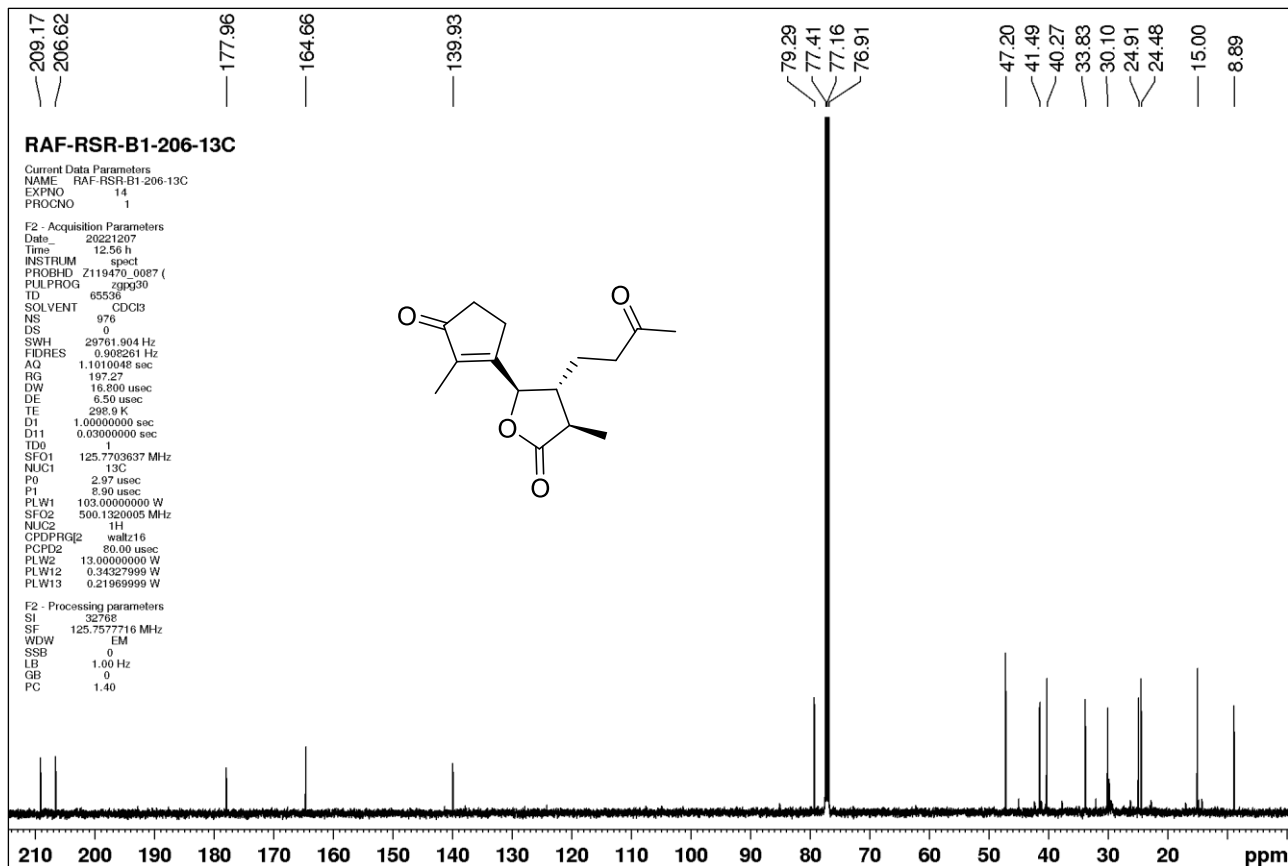

COSY (400 MHz, CDCl<sub>3</sub>) and NOESY (400 MHz, CDCl<sub>3</sub>) of compound **18**

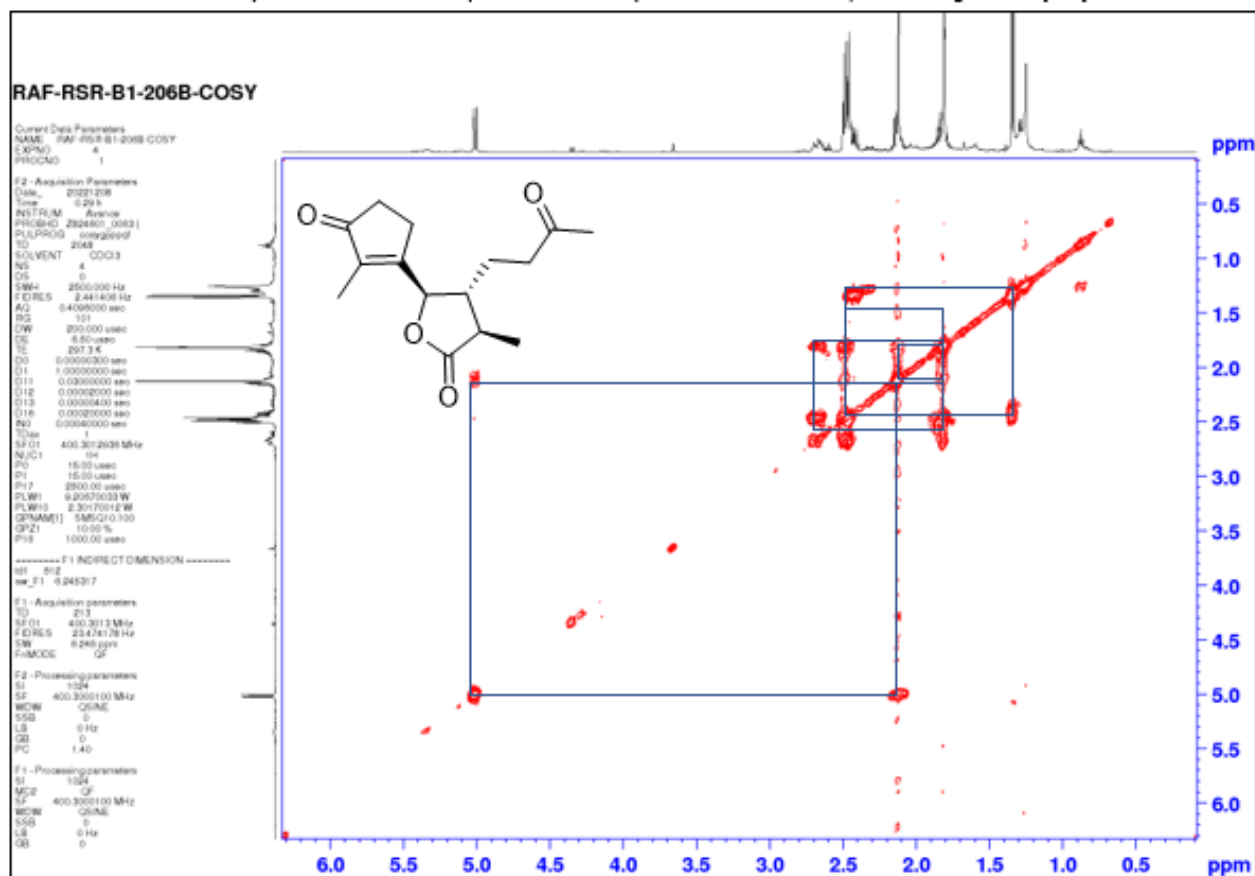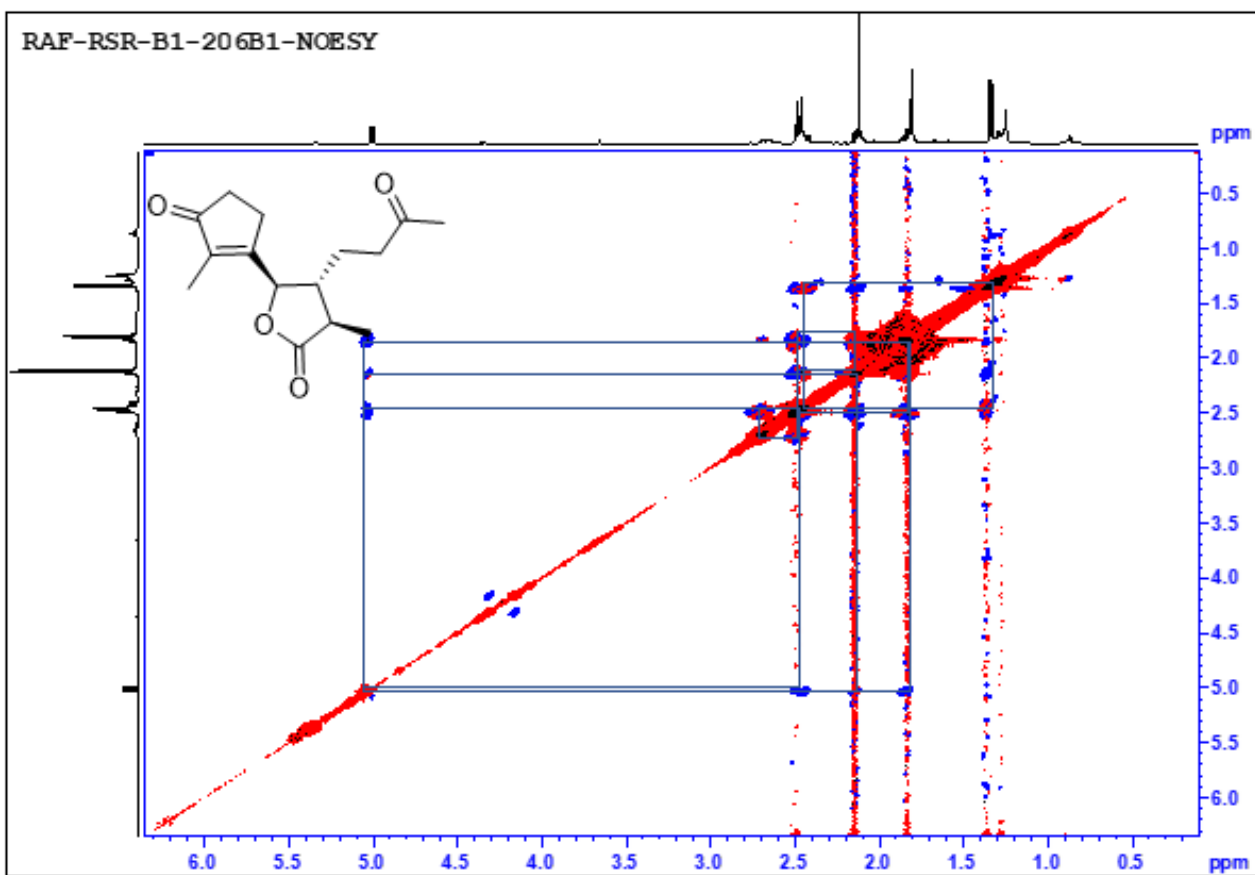

18: HRMS (Q-TOF)  $m/z$ :  $[M + H]^+$  Calcd for  $C_{15}H_{21}O_4$  265.1435; Found 265.1429.

Compound Spectra (Zoomed)

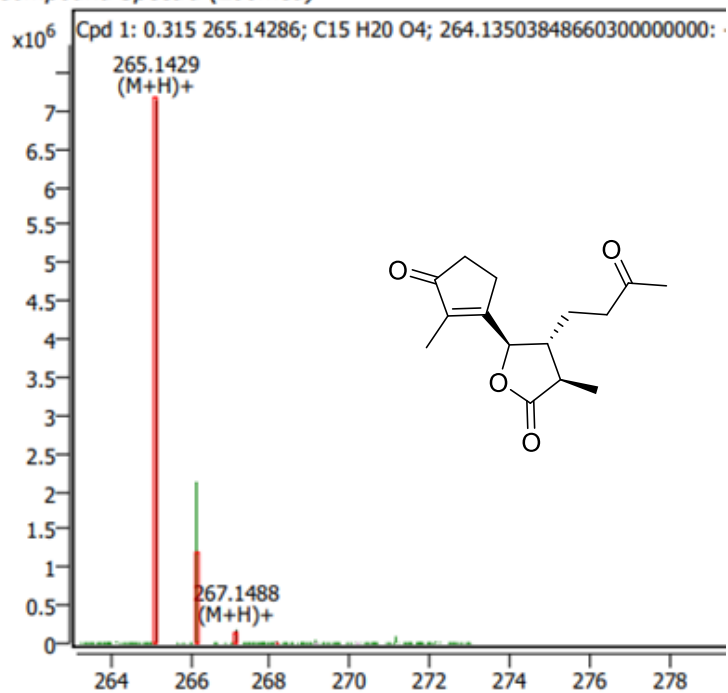

$^1\text{H}$  NMR (400 MHz,  $\text{CDCl}_3$ ) and  $^{13}\text{C}\{^1\text{H}\}$  NMR (100 MHz,  $\text{CDCl}_3$ ) of compound **20**

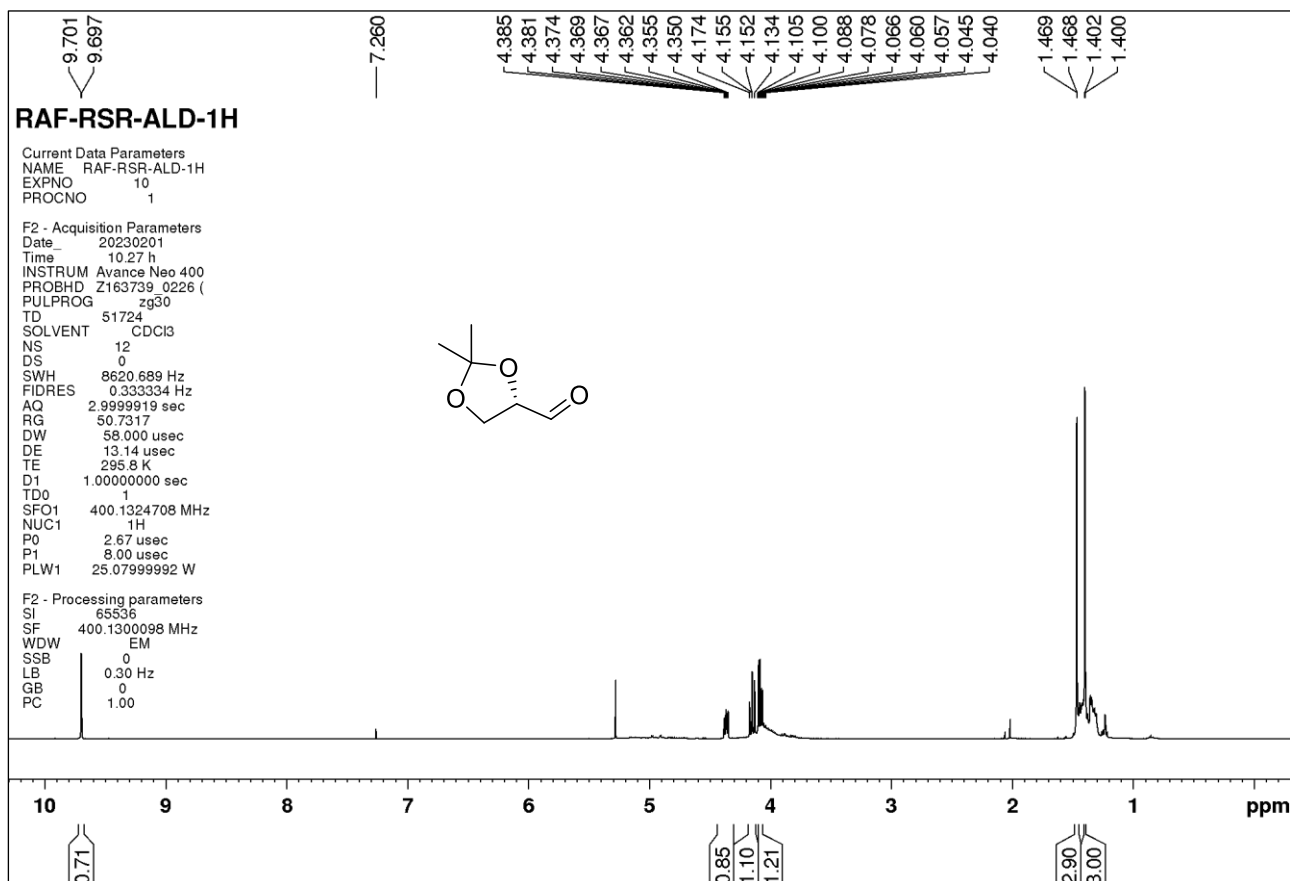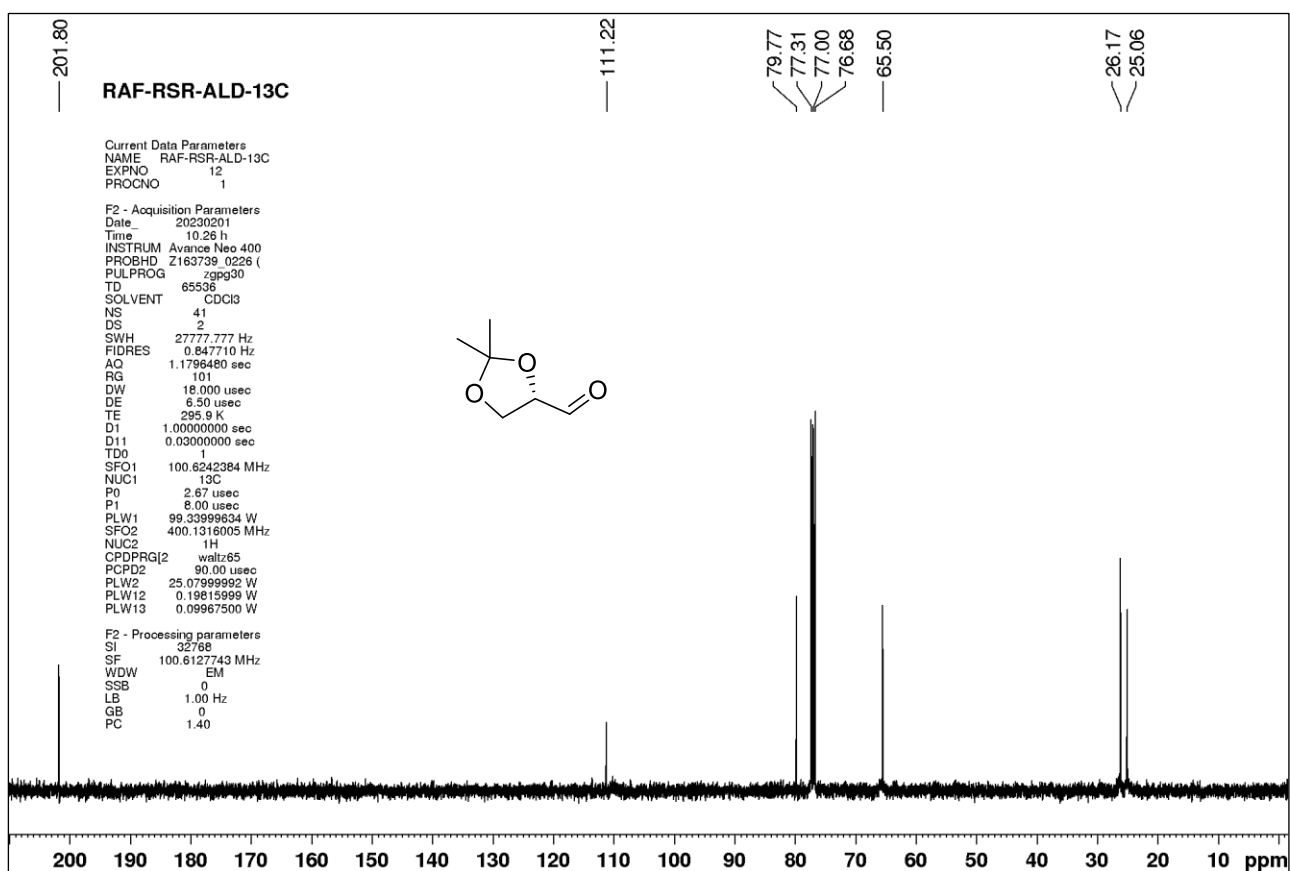

$^1\text{H}$  NMR (400 MHz,  $\text{CDCl}_3$ ) and  $^{13}\text{C}\{^1\text{H}\}$  NMR (100 MHz,  $\text{CDCl}_3$ ) of compound *ent*-**3b**

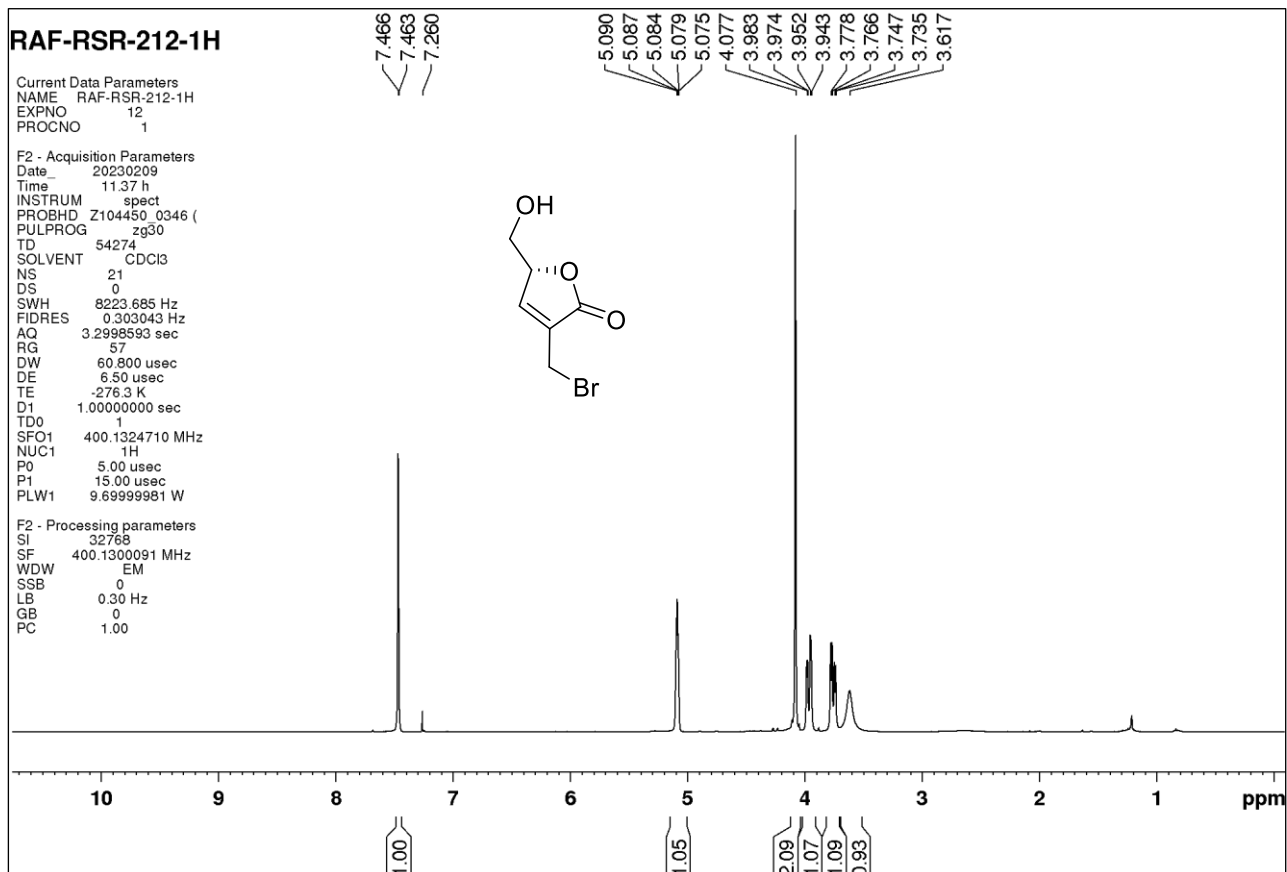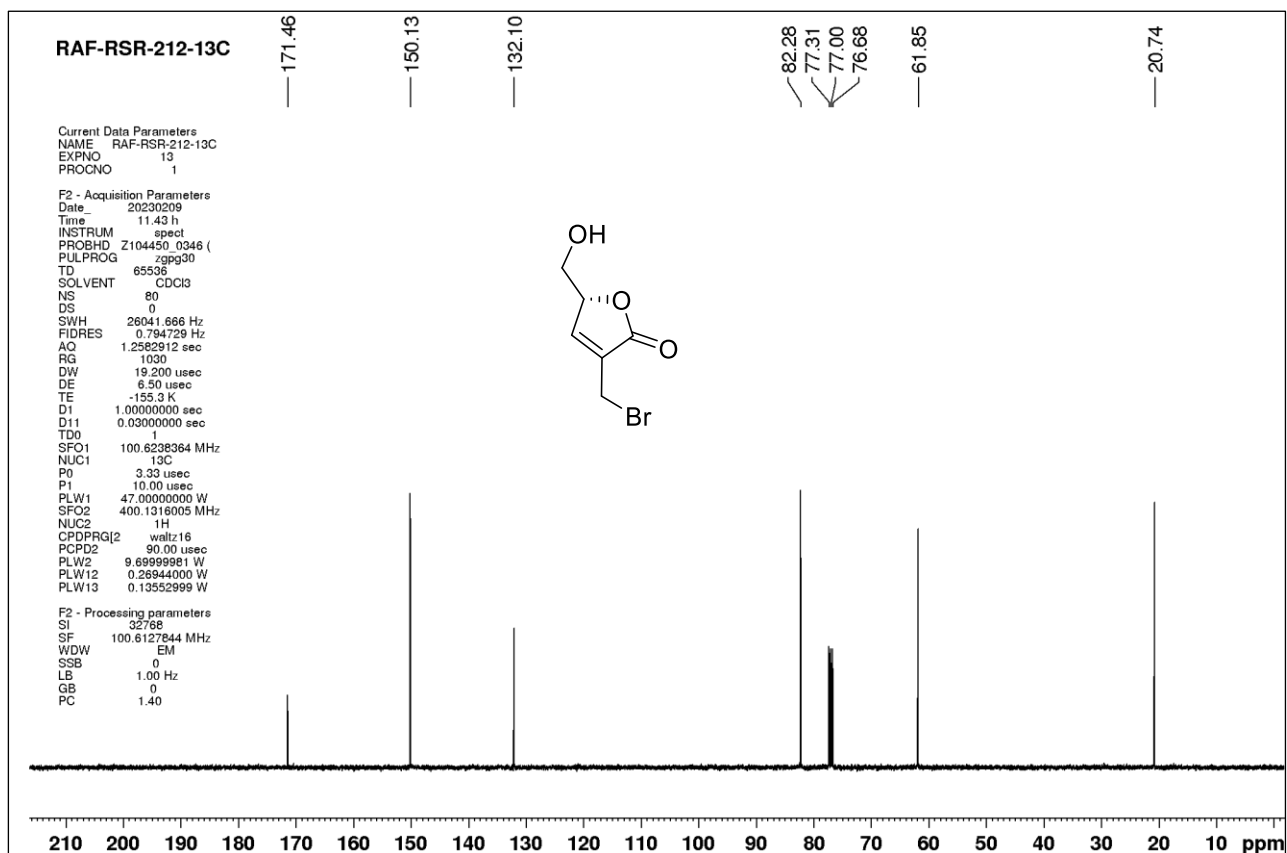

*ent*-**3b**: HRMS (Q-TOF)  $m/z$ :  $[M + H]^+$  Calcd for  $C_6H_8O_3Br$  206.9648; Found 206.9642.

Compound Spectra (Zoomed)

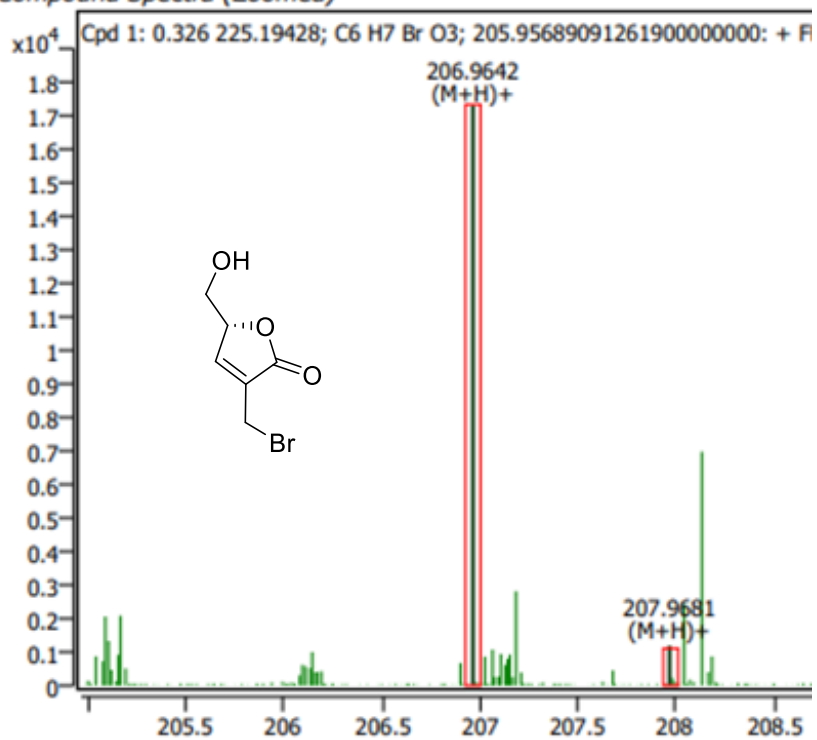

<sup>1</sup>H NMR (400 MHz, CDCl<sub>3</sub>) and <sup>13</sup>C{<sup>1</sup>H} NMR (125 MHz, CDCl<sub>3</sub>) of compound *ent-12*

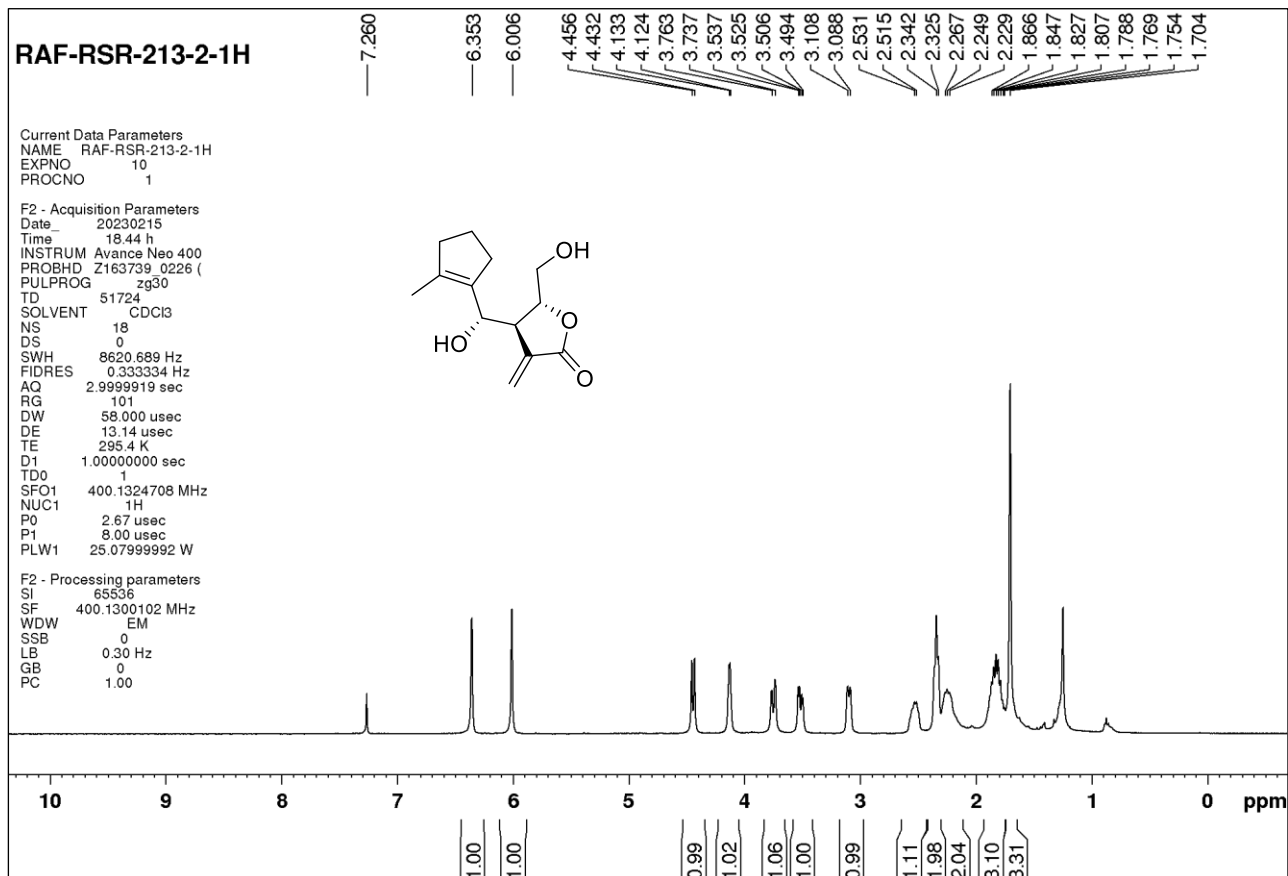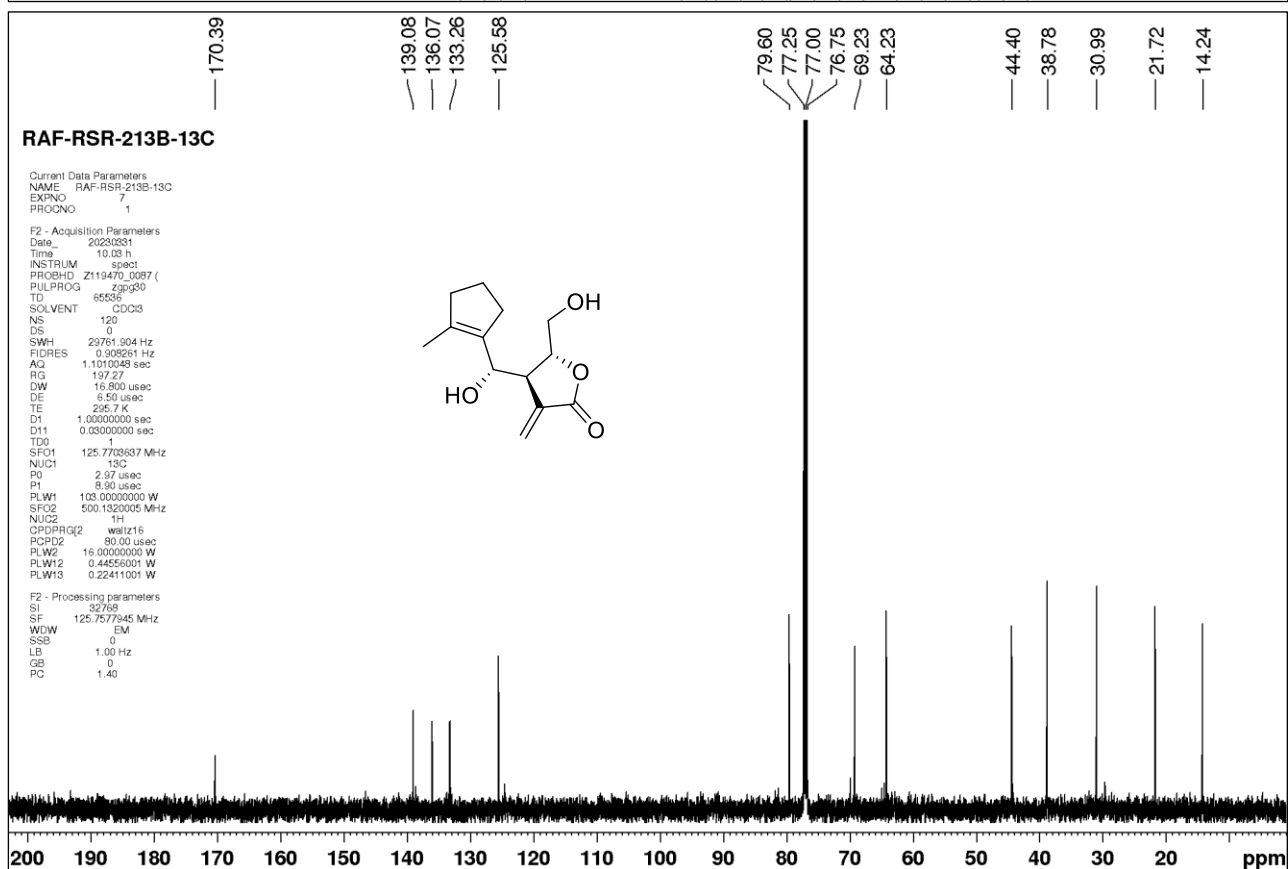

*ent*-**12**: HRMS (Q-TOF)  $m/z$ :  $[M + Na]^+$  Calcd for  $C_{13}H_{18}O_4Na$  261.1098; Found 261.1094.

Compound Spectra (Zoomed)

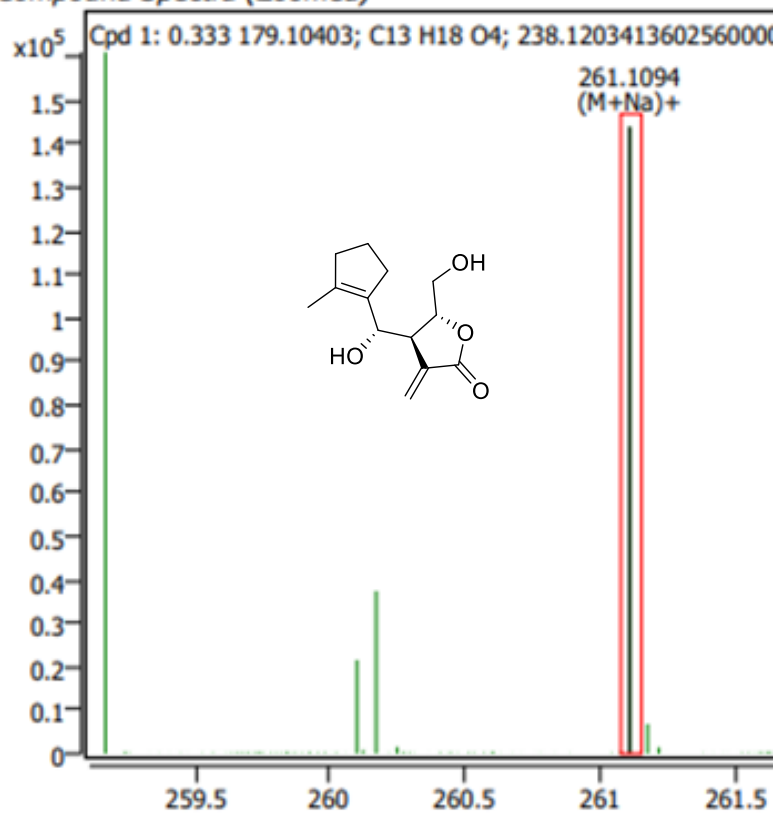



<sup>1</sup>H NMR (400 MHz, CDCl<sub>3</sub>) and <sup>13</sup>C{<sup>1</sup>H} NMR (100 MHz, CDCl<sub>3</sub>) of compound *ent*-13

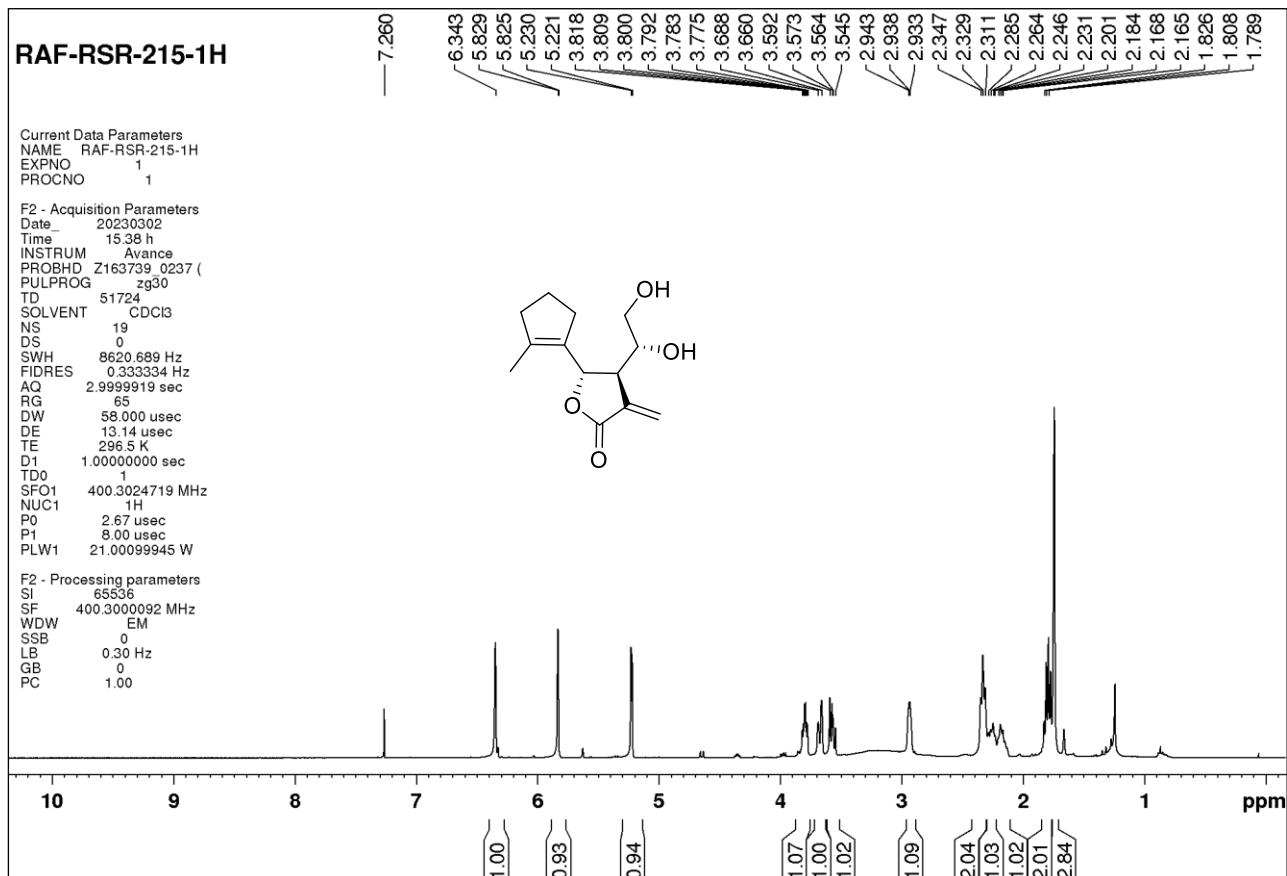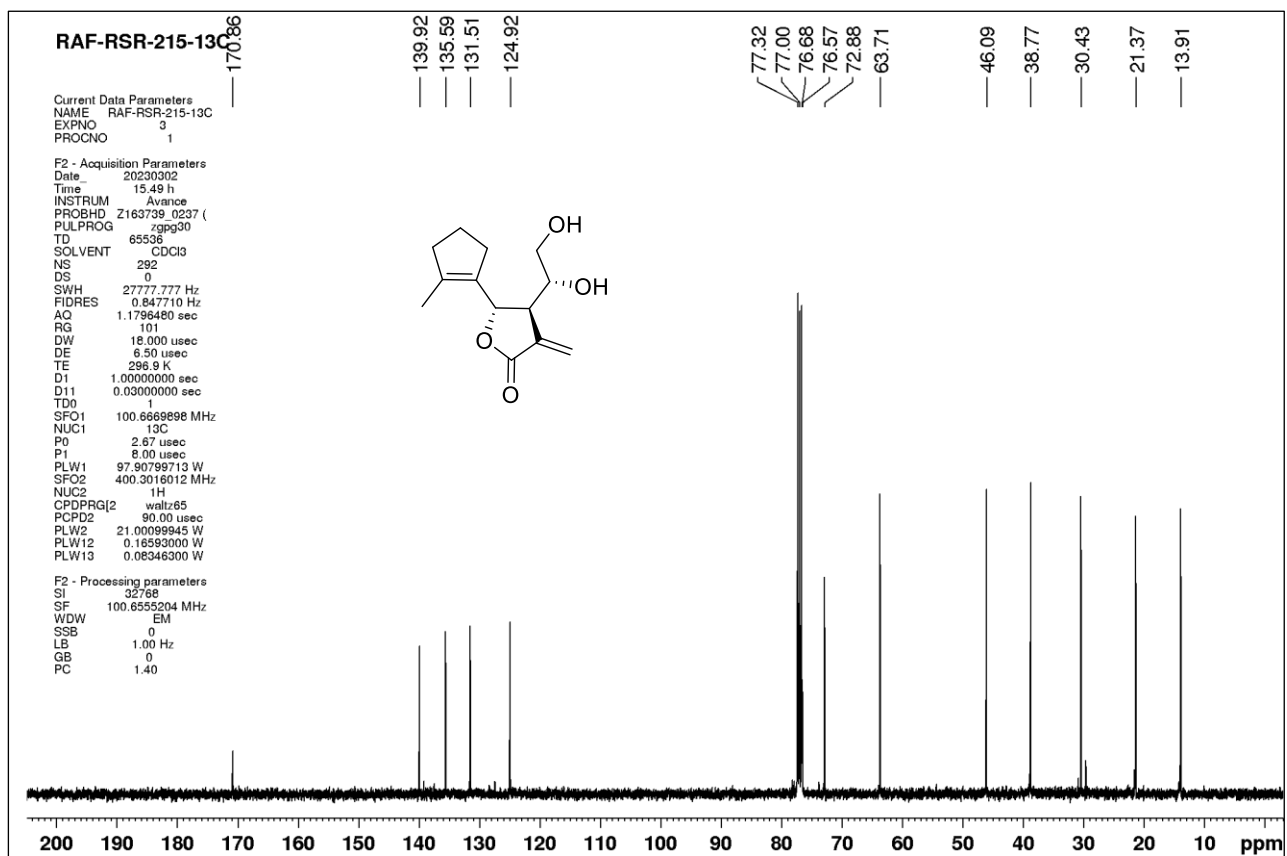

*ent*-**13**: HRMS (Q-TOF)  $m/z$ :  $[M + H]^+$  Calcd for  $C_{13}H_{19}O_4$  239.1278; Found 239.1293.

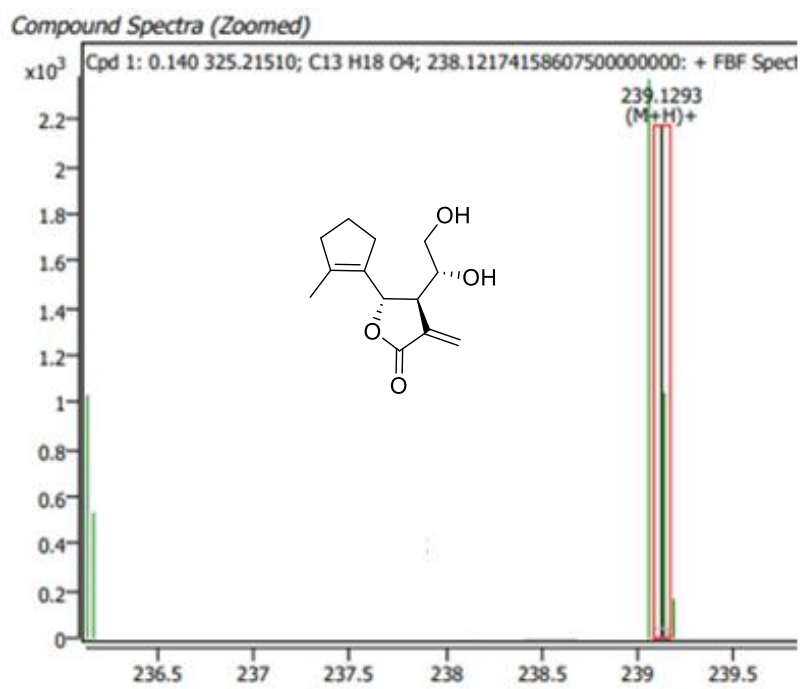

<sup>1</sup>H NMR (500 MHz, CDCl<sub>3</sub>) and <sup>13</sup>C{<sup>1</sup>H} NMR (125 MHz, CDCl<sub>3</sub>) of compound *ent*-14

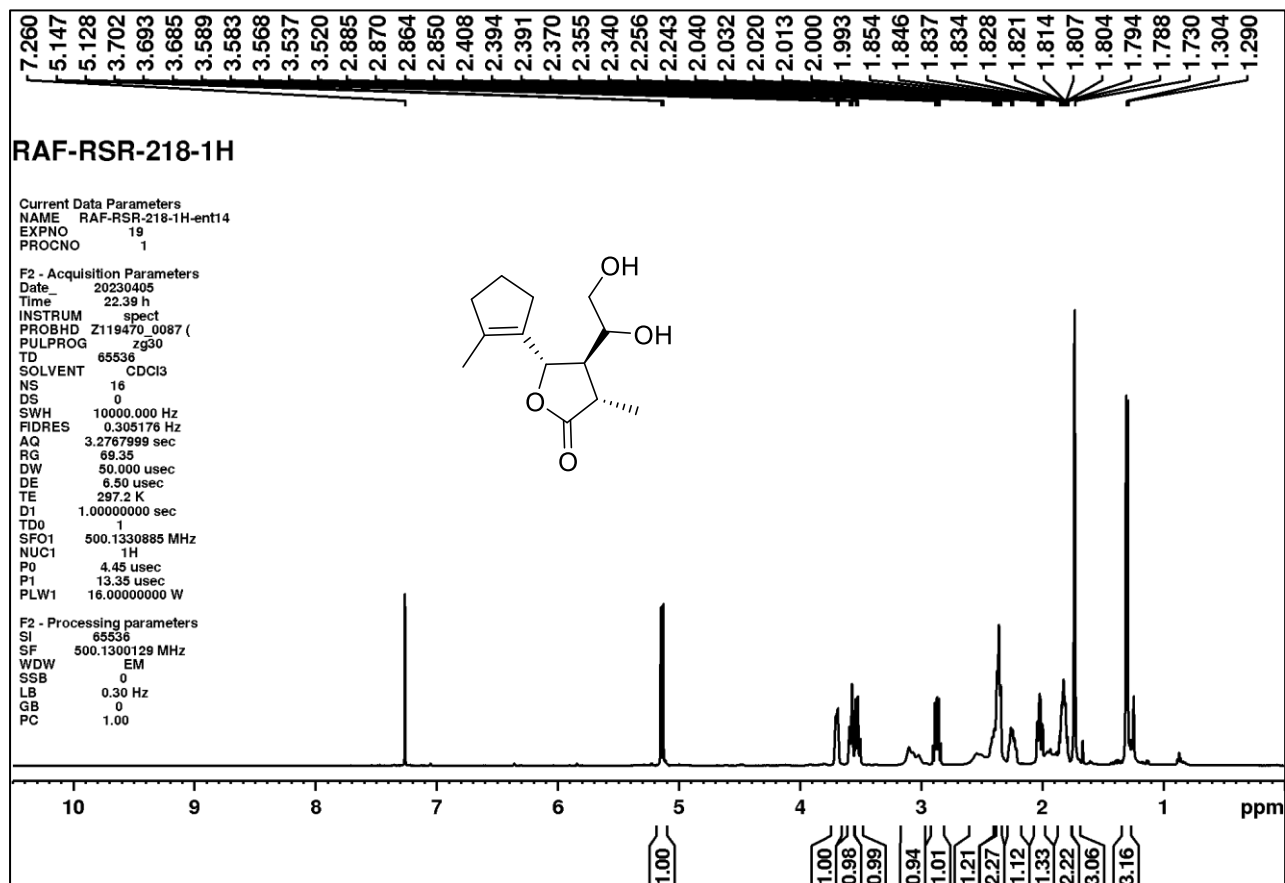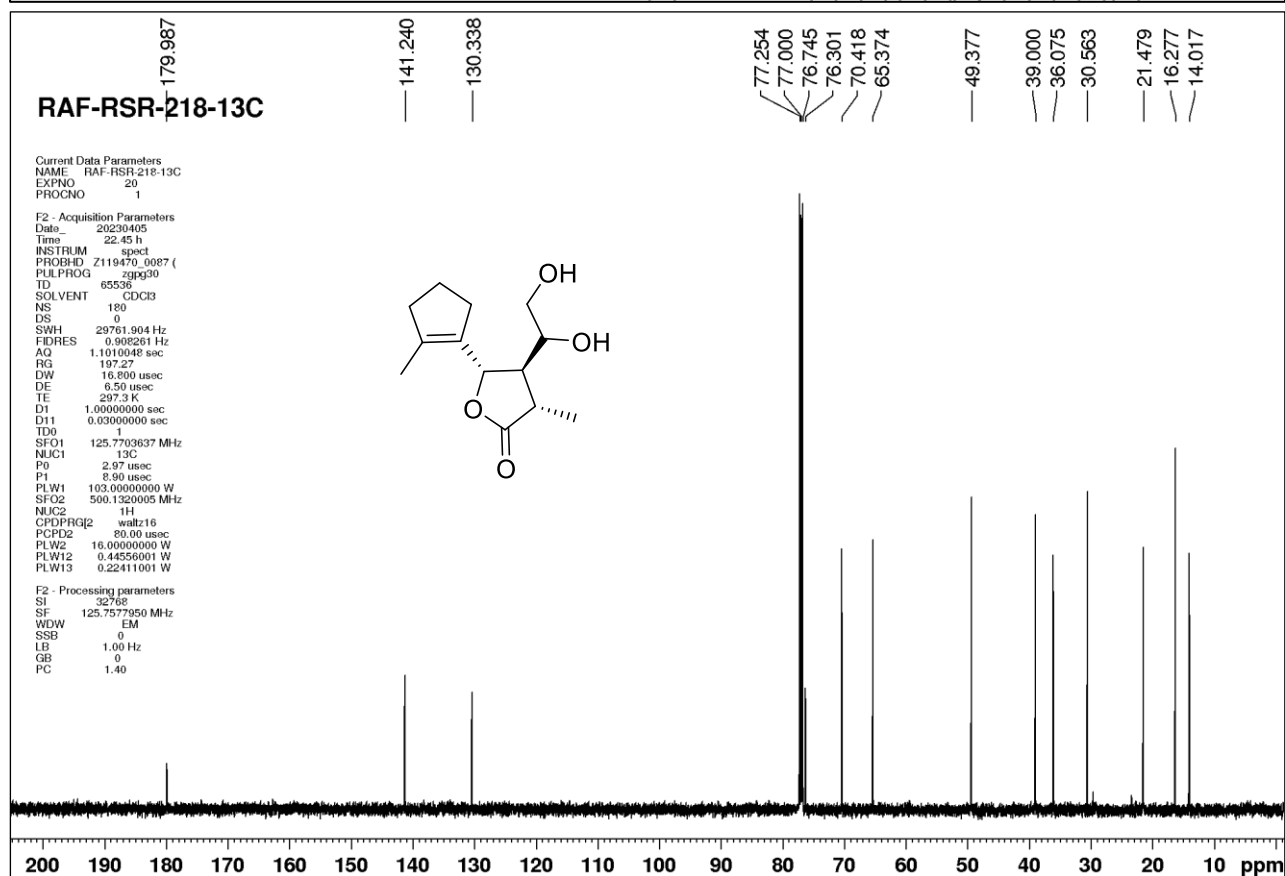

COSY (400 MHz, CDCl<sub>3</sub>) and NOESY (400 MHz, CDCl<sub>3</sub>) of compound *ent*-14

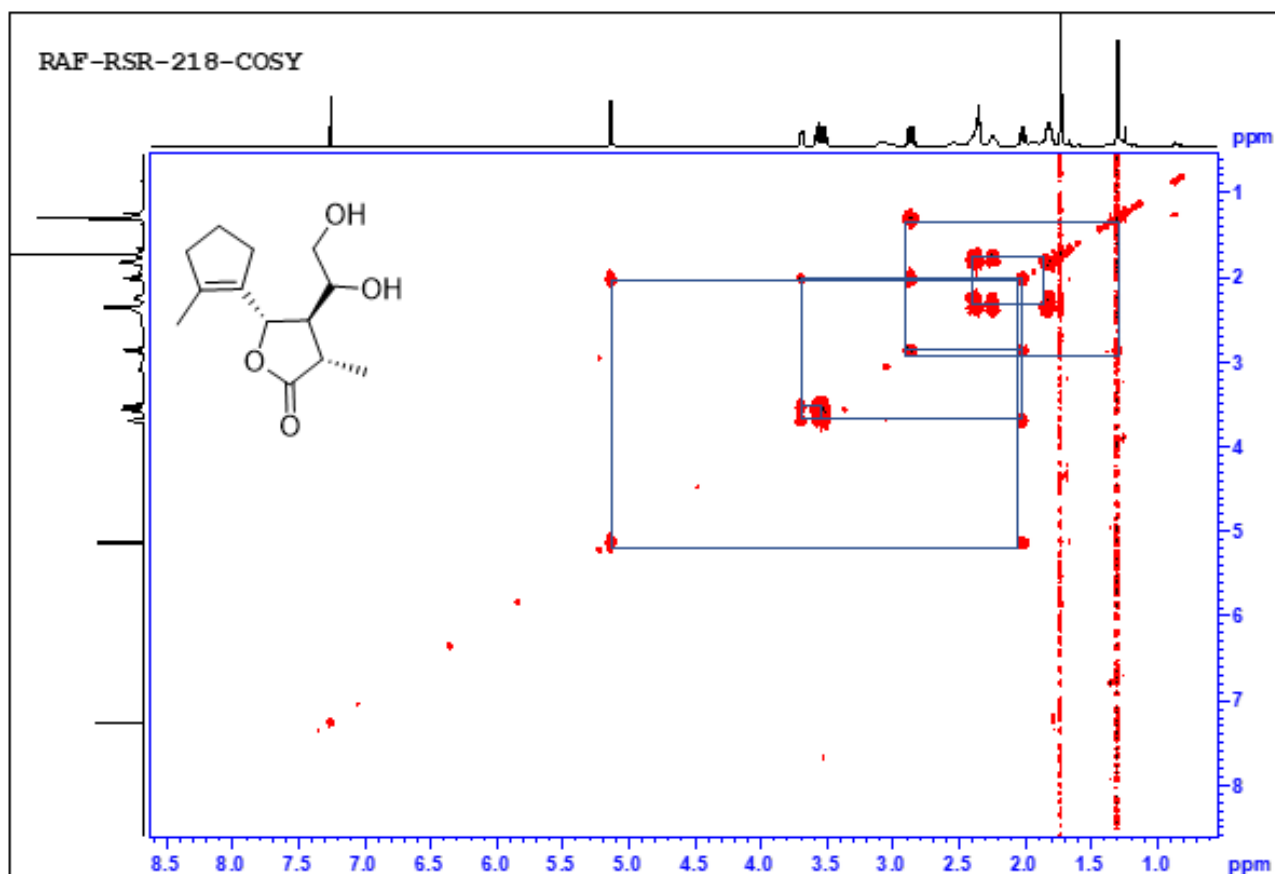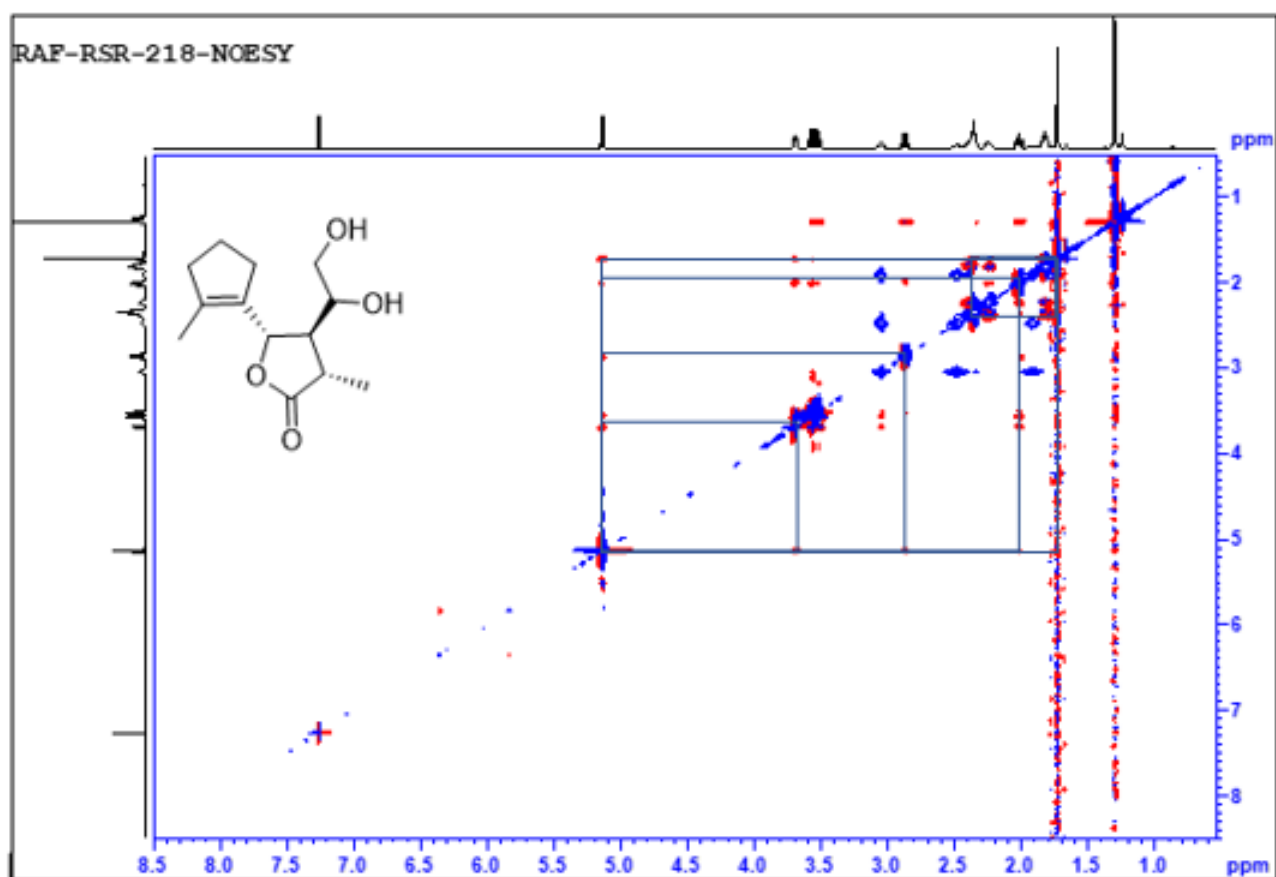

*ent*-14: HRMS (Q-TOF)  $m/z$ :  $[M + Na]^+$  Calcd for  $C_{13}H_{20}O_4Na$  263.1254; Found 263.1242.

Compound Spectra (Zoomed)

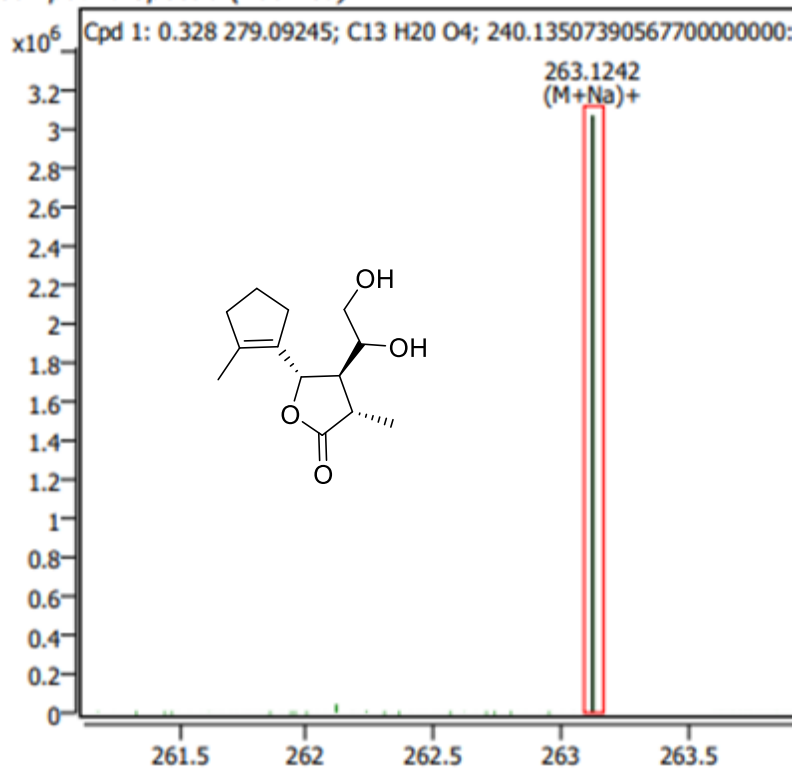

<sup>1</sup>H NMR (400 MHz, CDCl<sub>3</sub>) and <sup>13</sup>C{<sup>1</sup>H} NMR (100 MHz, CDCl<sub>3</sub>) of compound *ent-16*

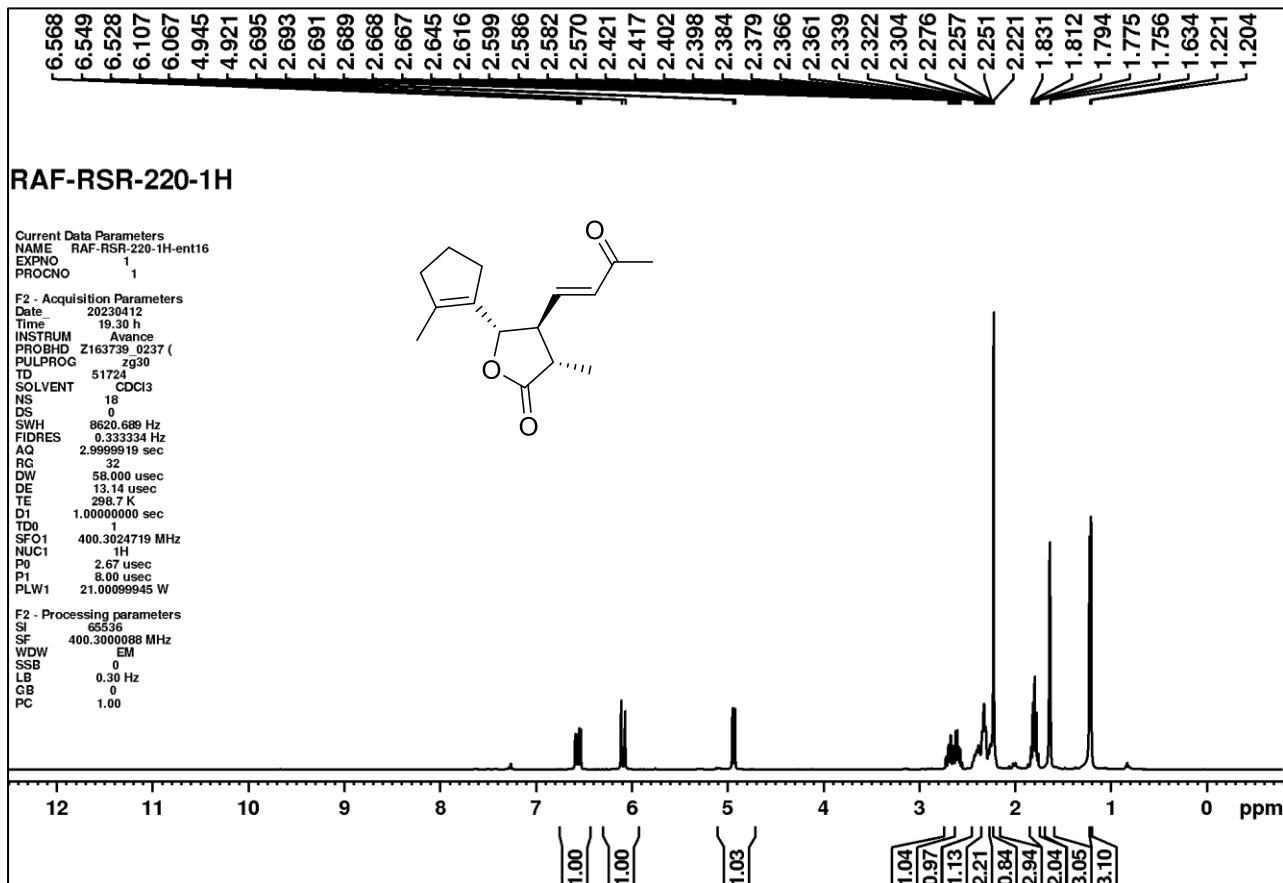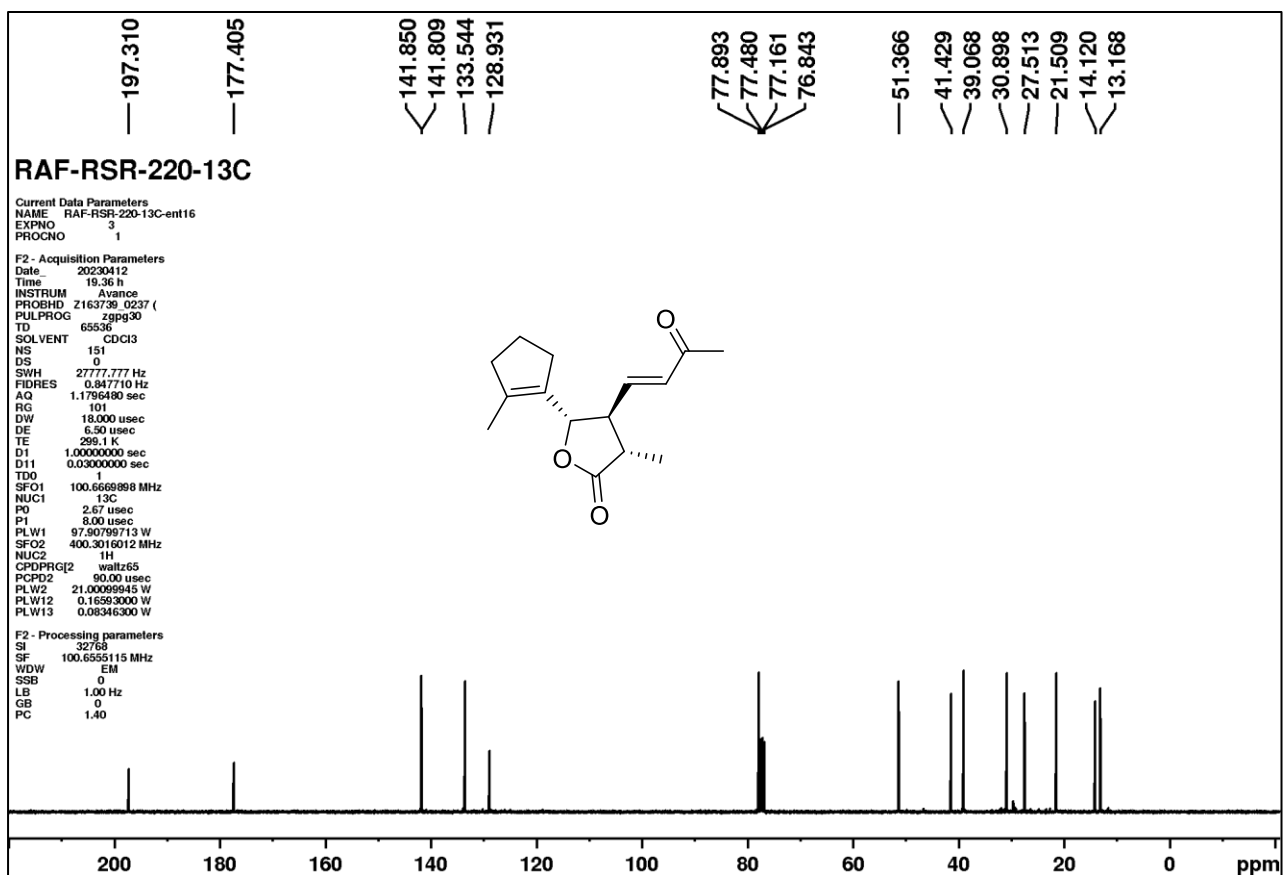

*ent*-16: HRMS (Q-TOF)  $m/z$ :  $[M + H]^+$  Calcd for  $C_{15}H_{21}O_3$  249.1486; Found 249.1473.

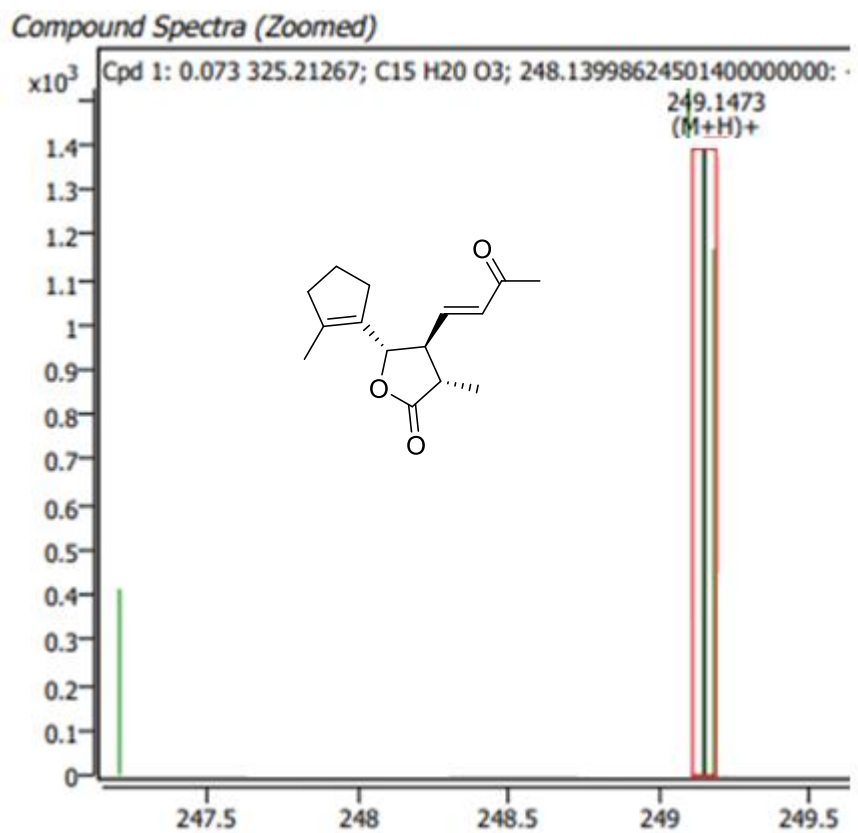

<sup>1</sup>H NMR (500 MHz, CDCl<sub>3</sub>) and <sup>13</sup>C{<sup>1</sup>H} NMR (125 MHz, CDCl<sub>3</sub>) of compound *ent-17*

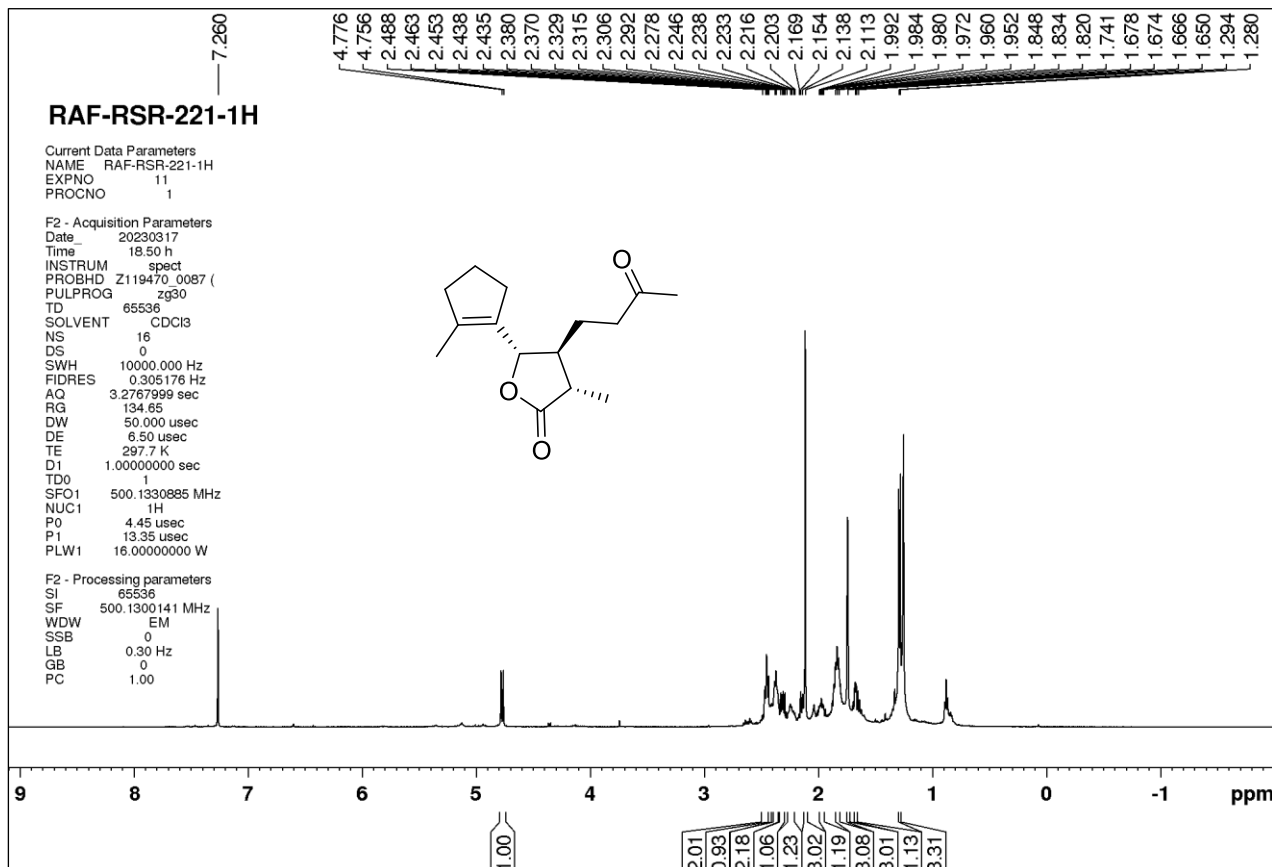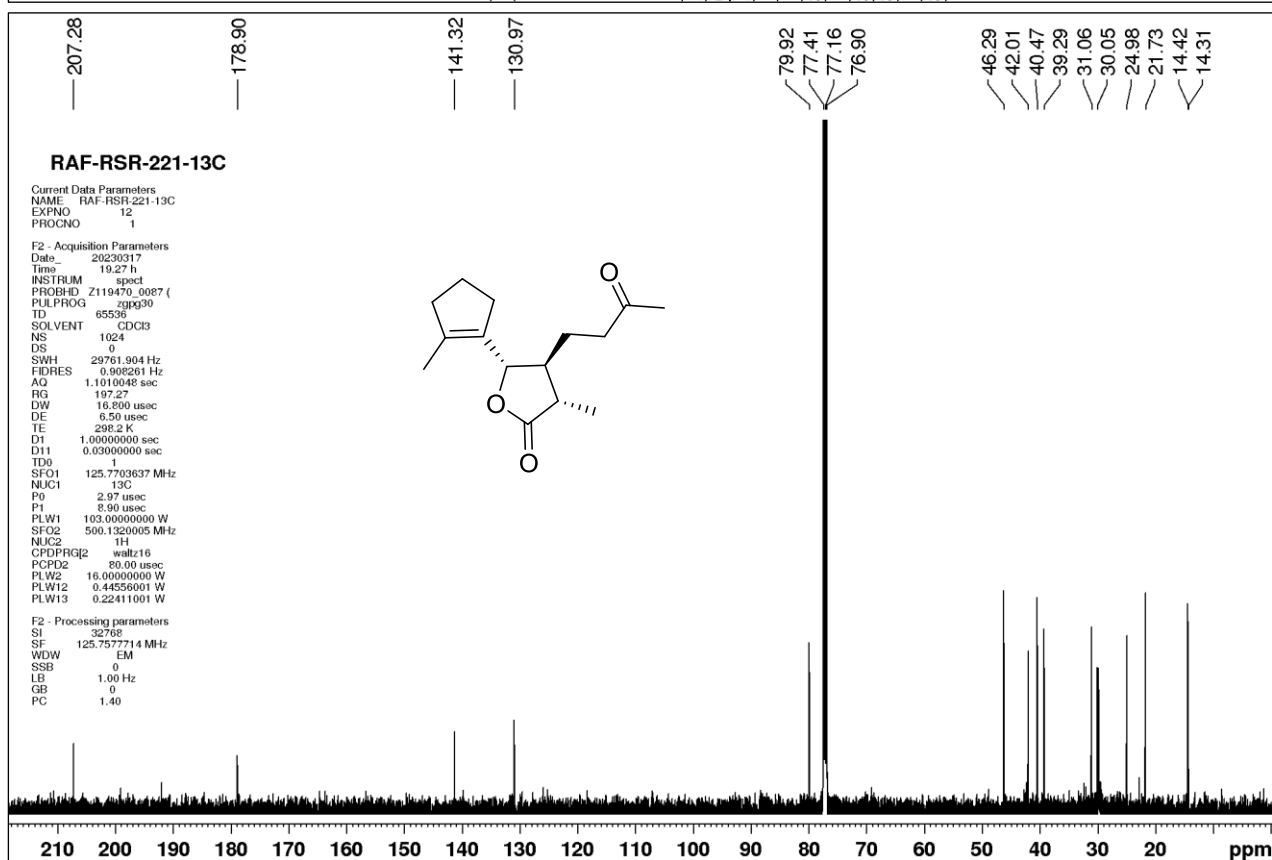



*ent*-17: HRMS (Q-TOF)  $m/z$ :  $[M + H]^+$  Calcd for  $C_{15}H_{23}O_3$  251.1642; Found 251.1634.

Compound Spectra (Zoomed)

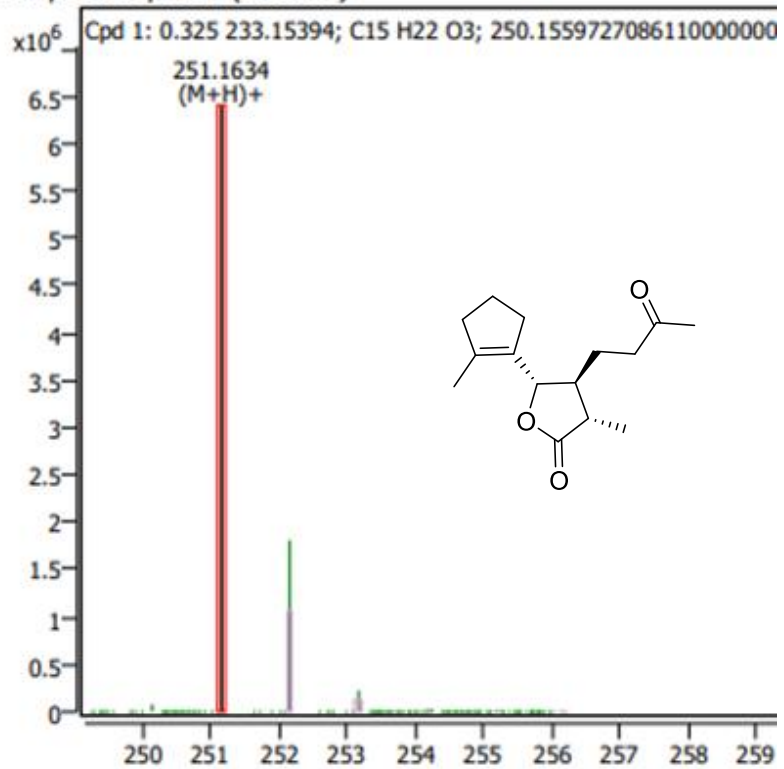

<sup>1</sup>H NMR (500 MHz, CDCl<sub>3</sub>) of compound **2a** and reported spectra of (±)-**2a**

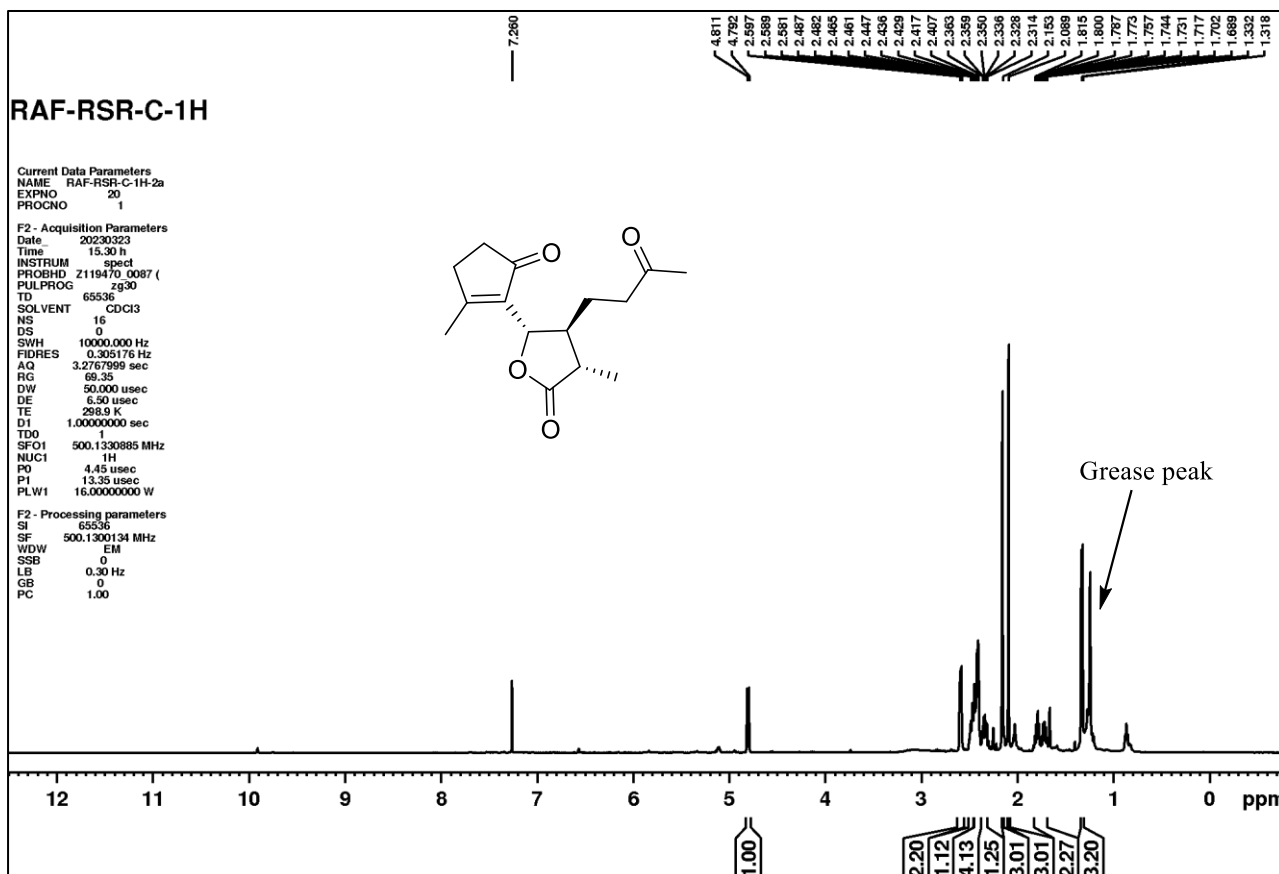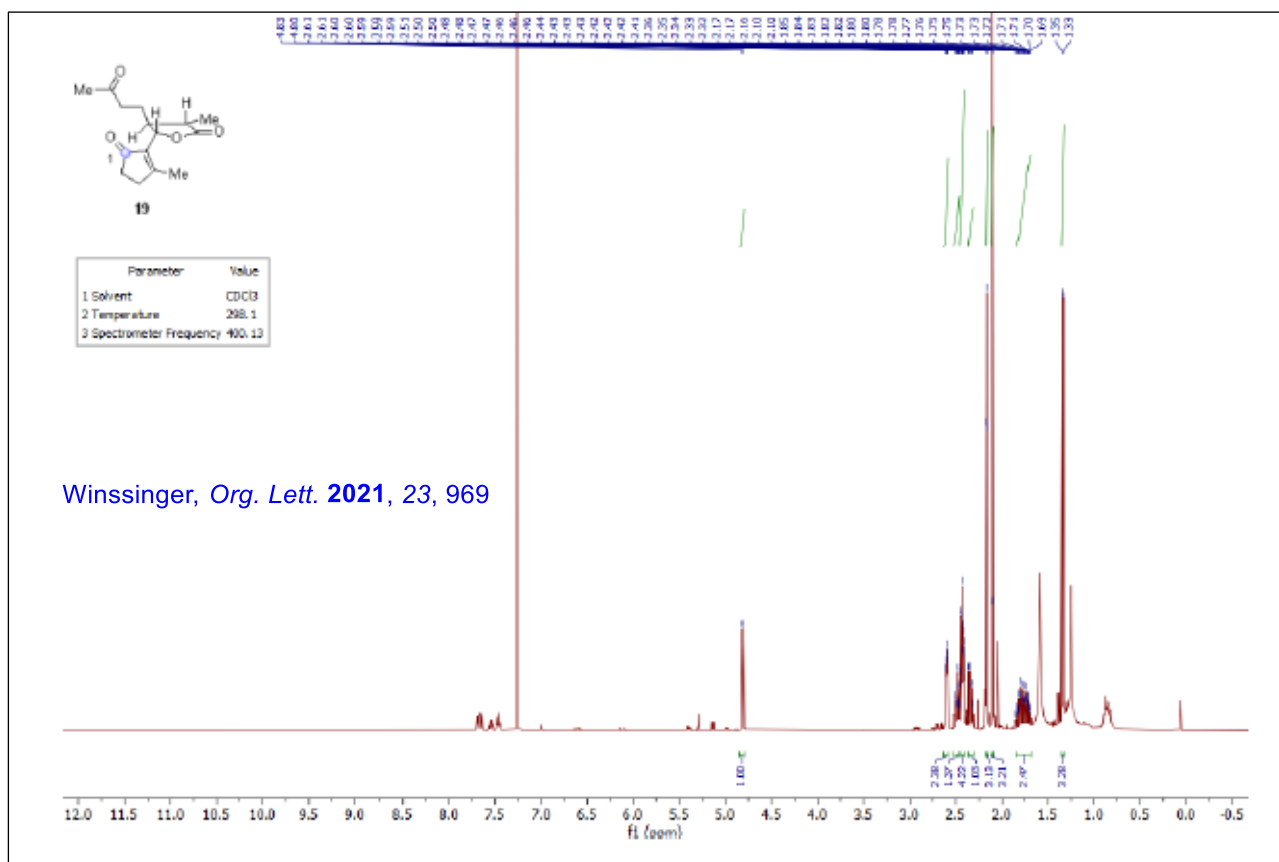

Wingsinger, *Org. Lett.* **2021**, *23*, 969

$^{13}\text{C}\{^1\text{H}\}$  NMR (125 MHz,  $\text{CDCl}_3$ ) of compound **2a** and reported spectra of ( $\pm$ )-**2a**

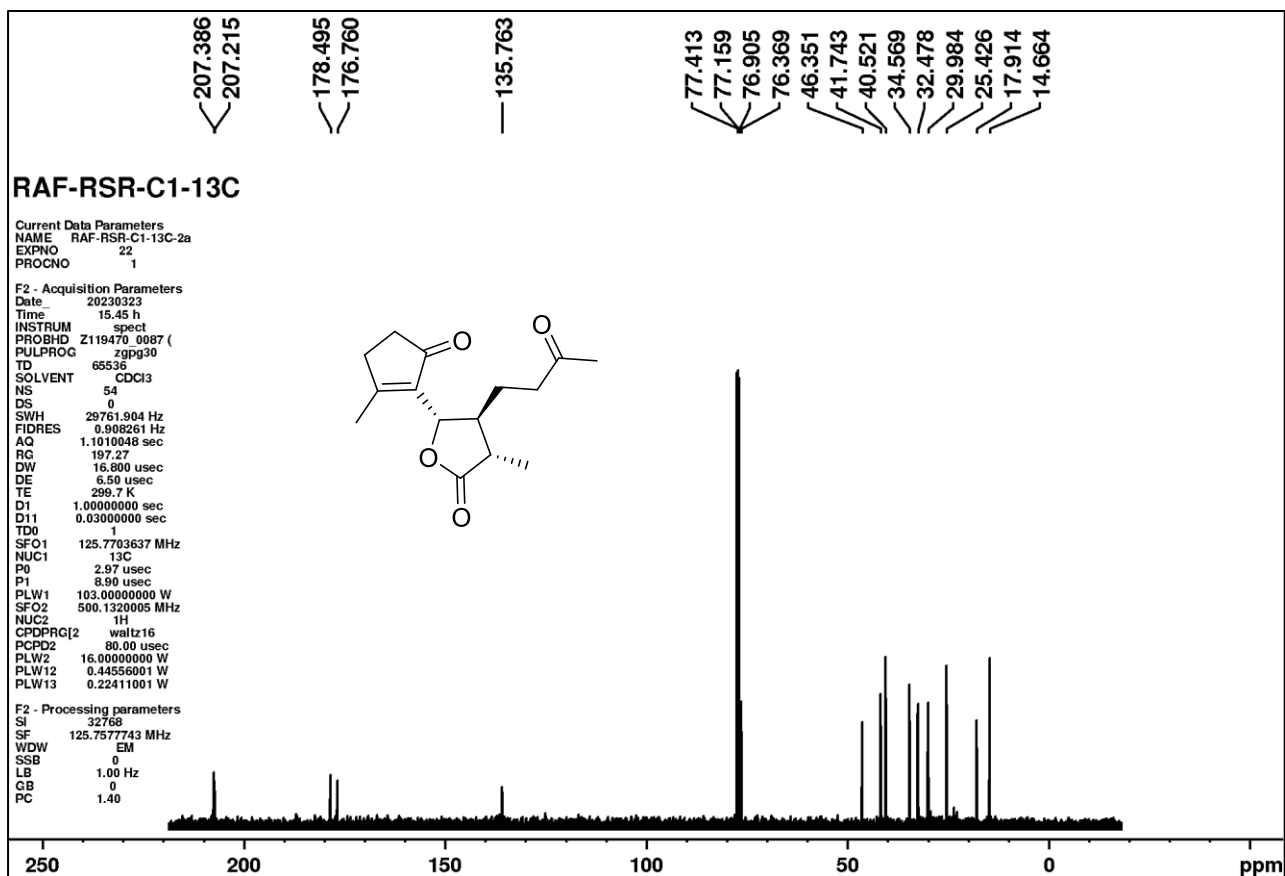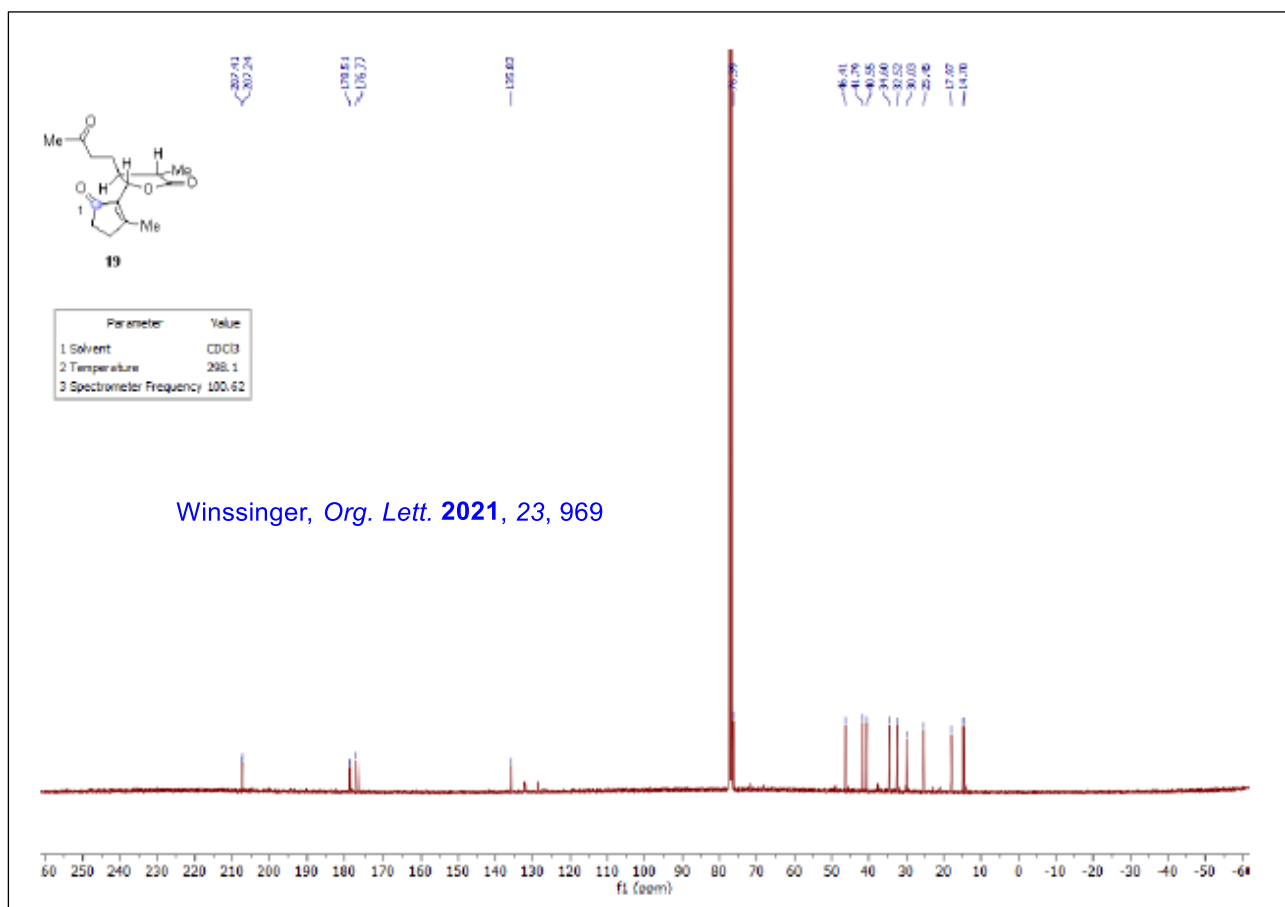

Winssinger, *Org. Lett.* **2021**, *23*, 969

COSY (400 MHz, CDCl<sub>3</sub>) of compound **2a** and reported spectra of (±)-**2a**

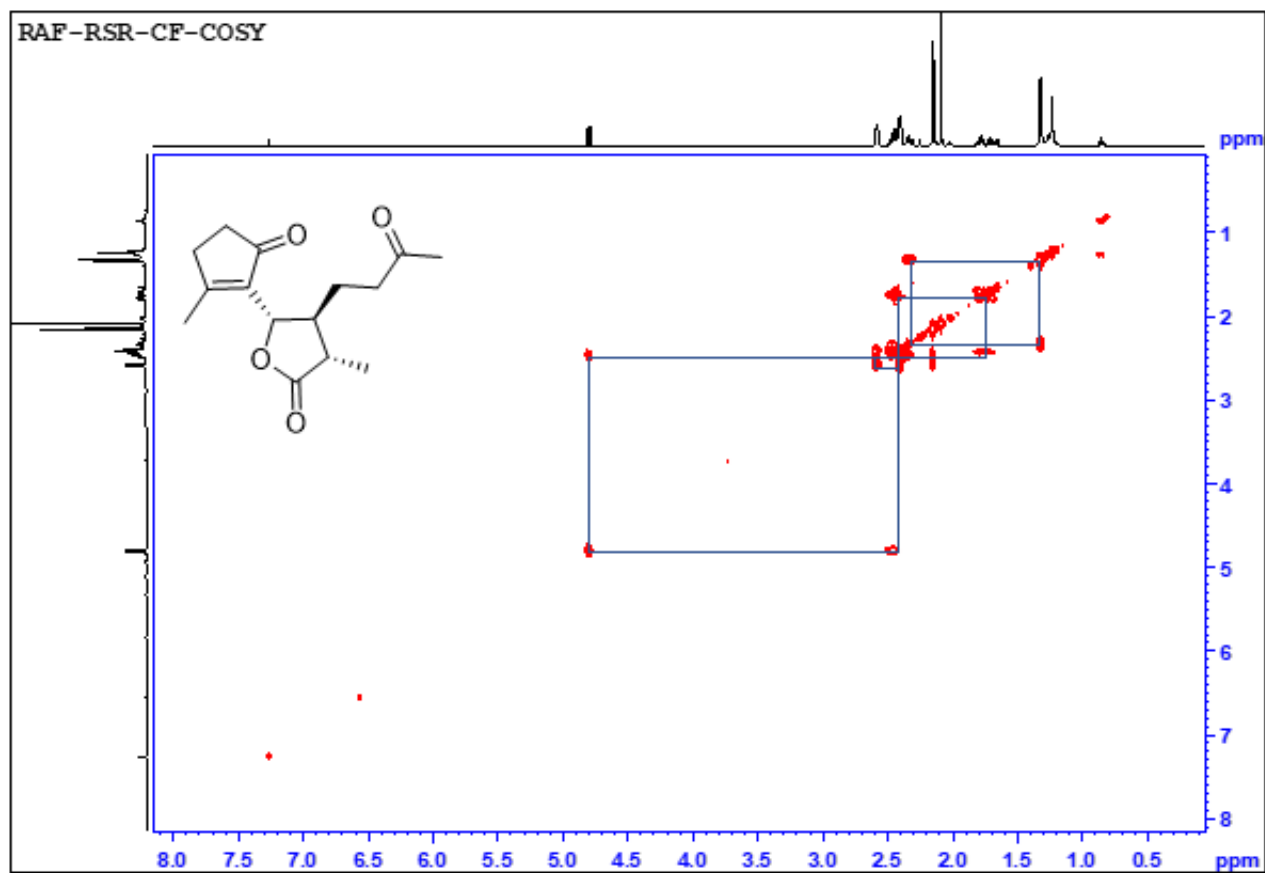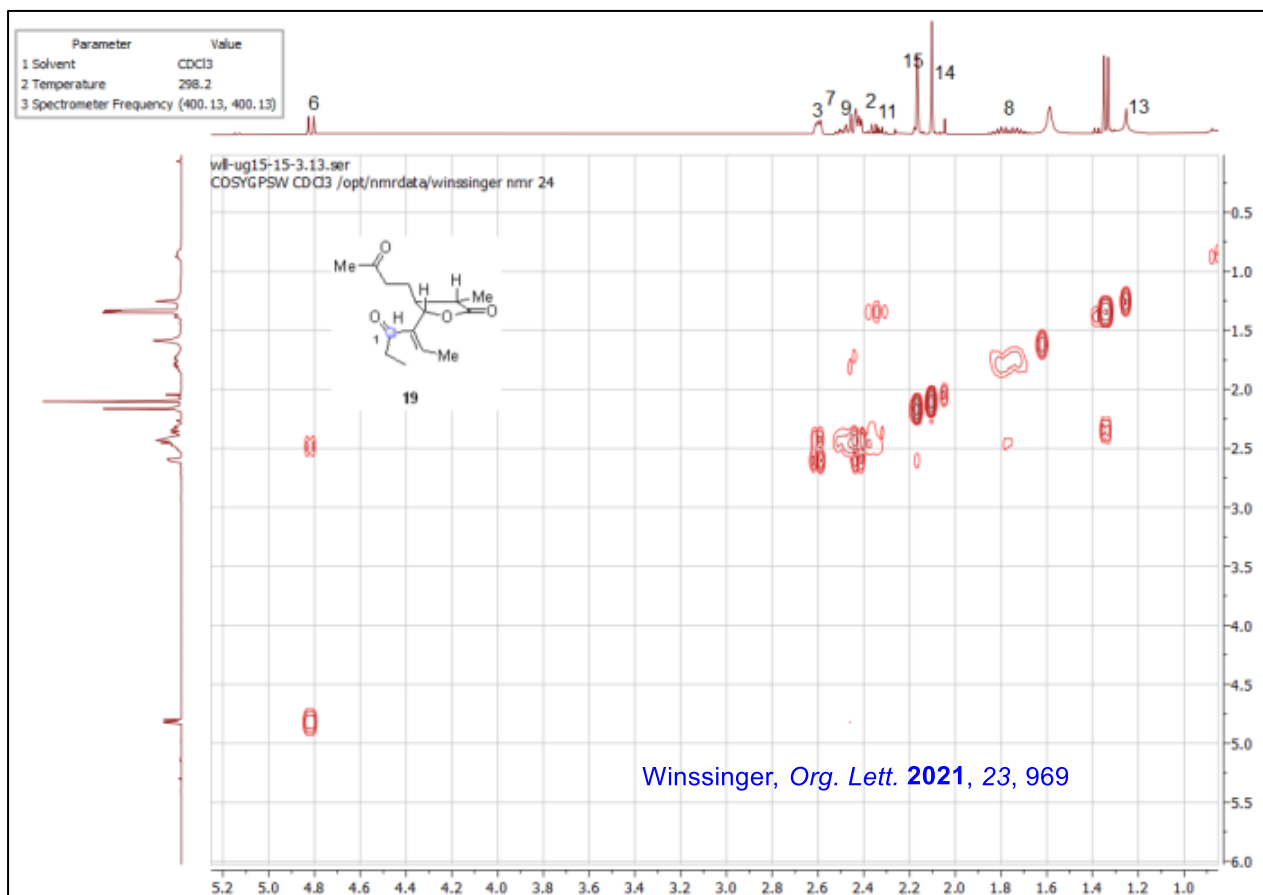

NOESY (400 MHz, CDCl<sub>3</sub>) of compound **2a** and reported spectra of (±)-**2a**

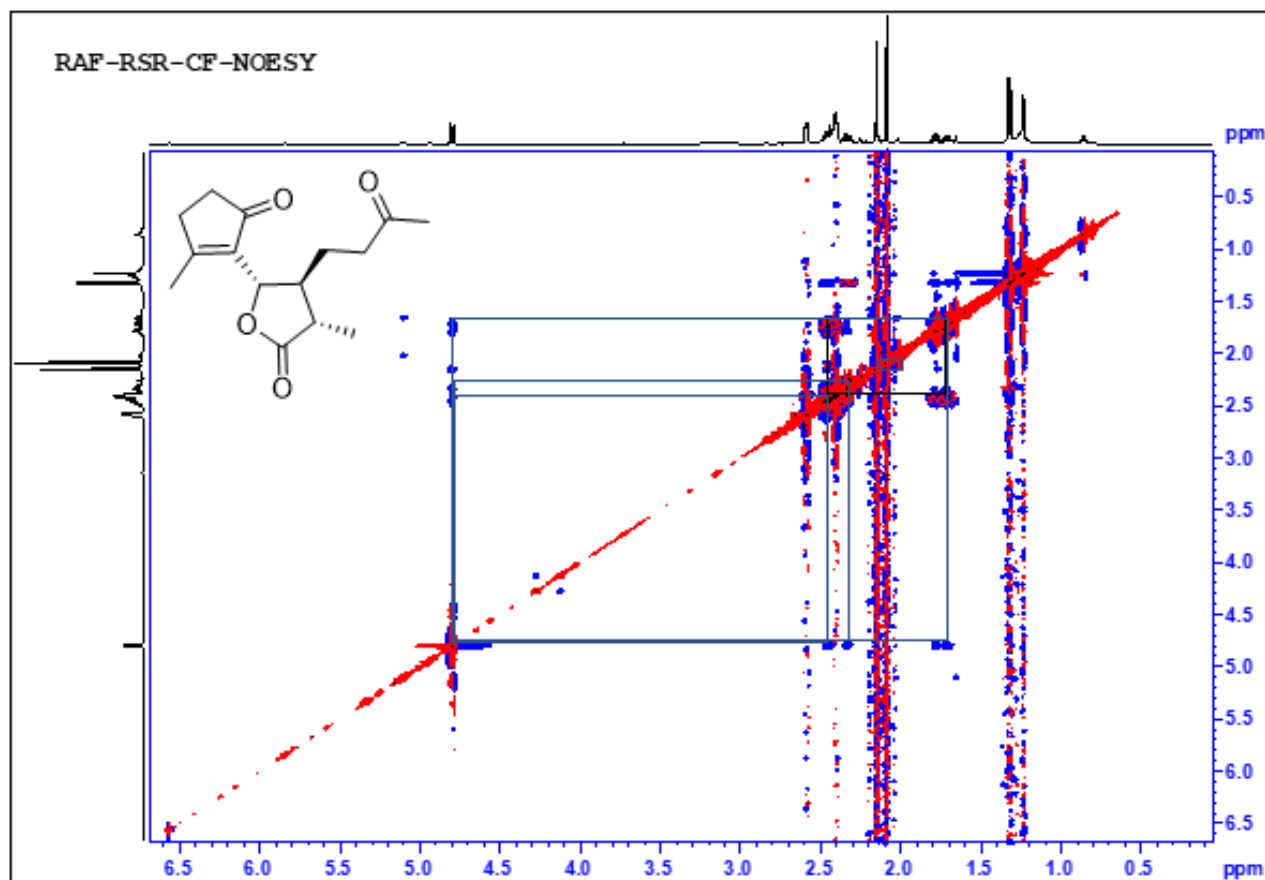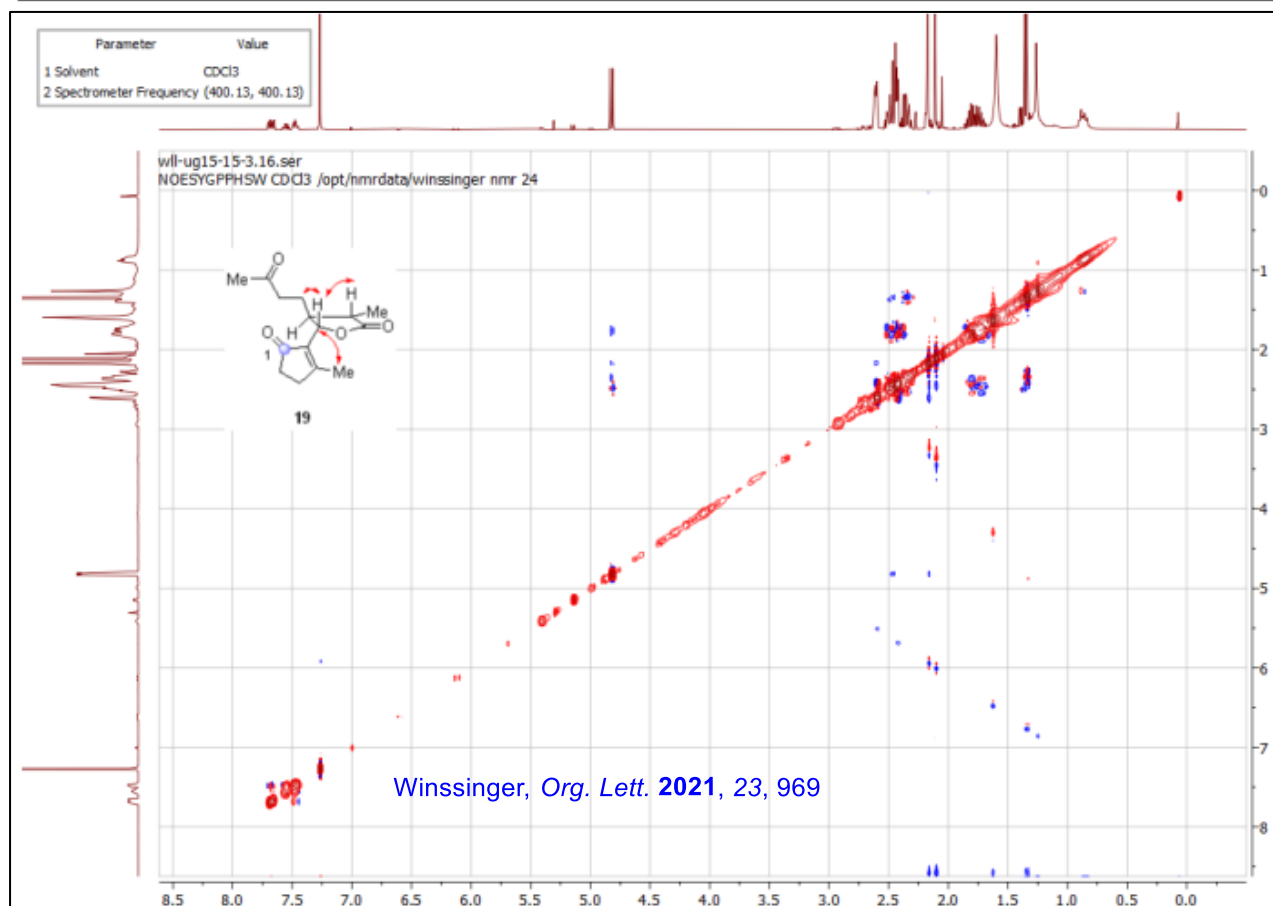

**2a:** HRMS (Q-TOF)  $m/z$ :  $[M + H]^+$  Calcd for  $C_{15}H_{21}O_4$  265.1435; Found 265.1429.

Compound Spectra (Zoomed)

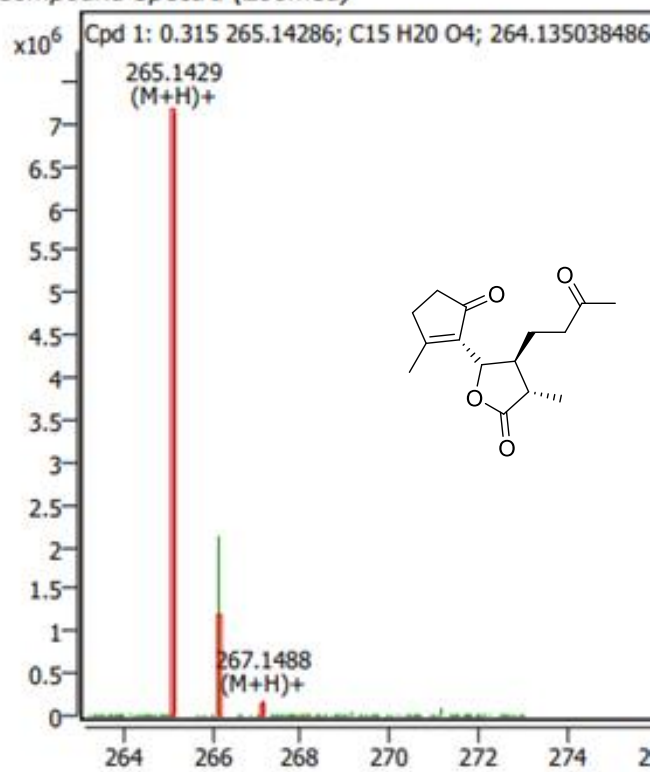

<sup>1</sup>H NMR (400 MHz, CDCl<sub>3</sub>) of compound *ent*-**18** and reported spectra of (±)-**18**

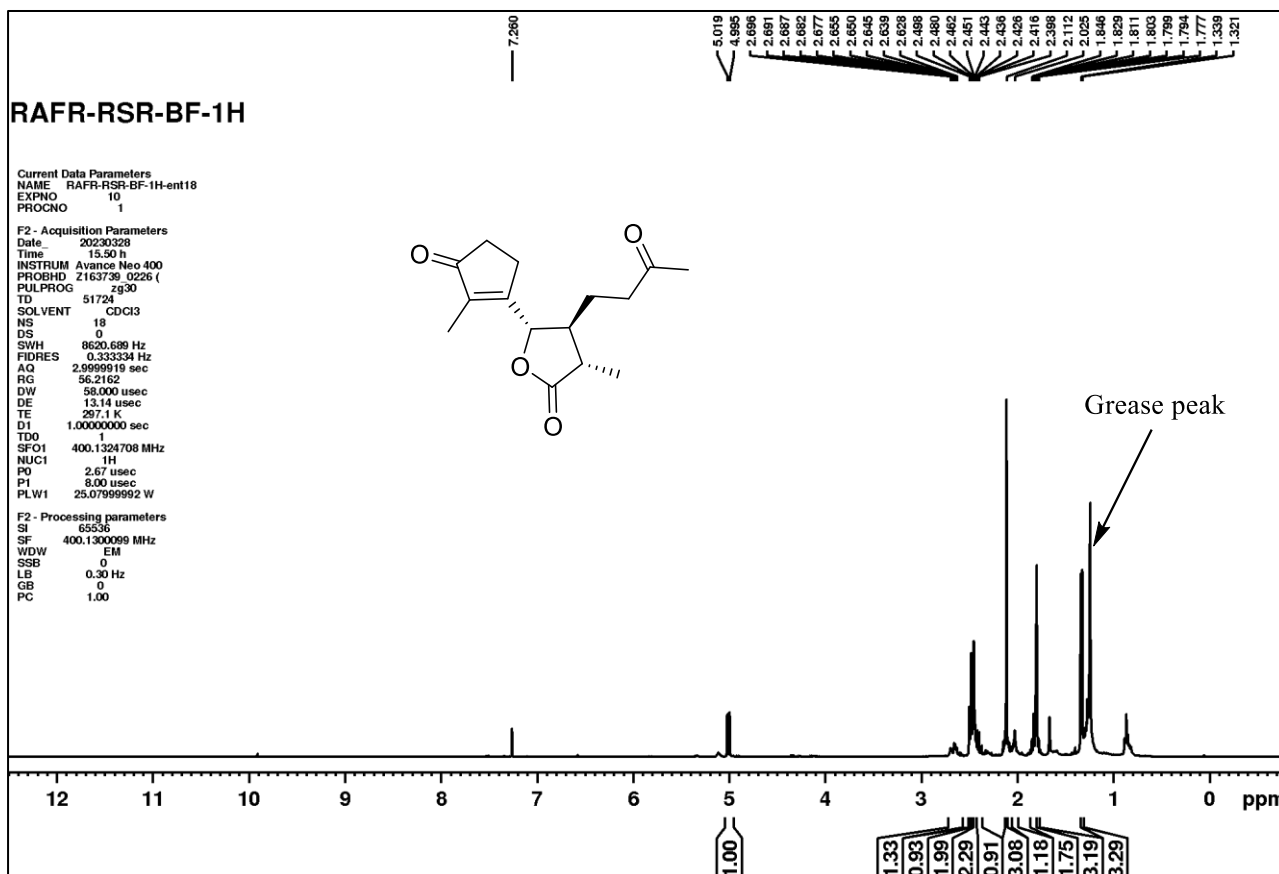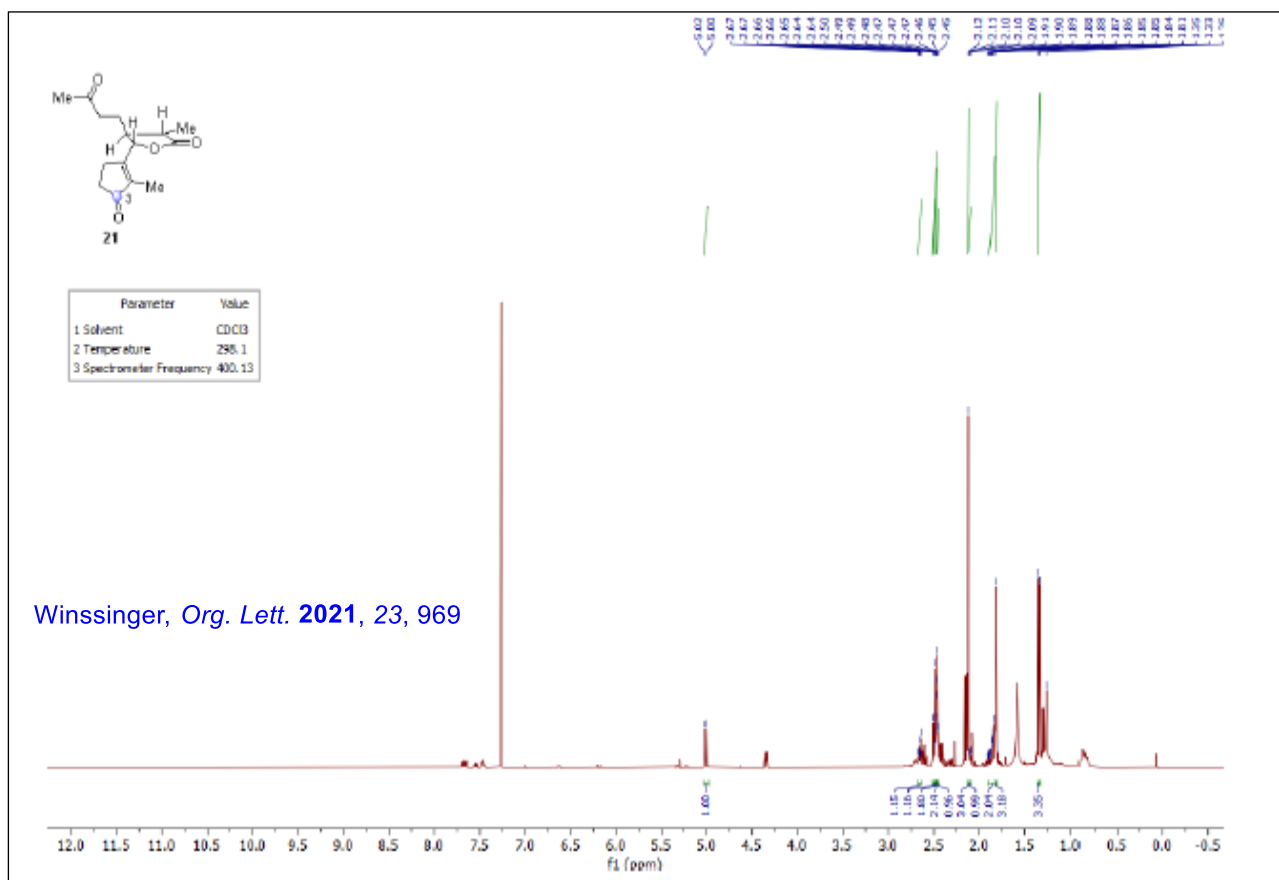

$^{13}\text{C}\{^1\text{H}\}$  NMR (100 MHz,  $\text{CDCl}_3$ ) of compound *ent*-**18** and reported spectra of ( $\pm$ )-**18**

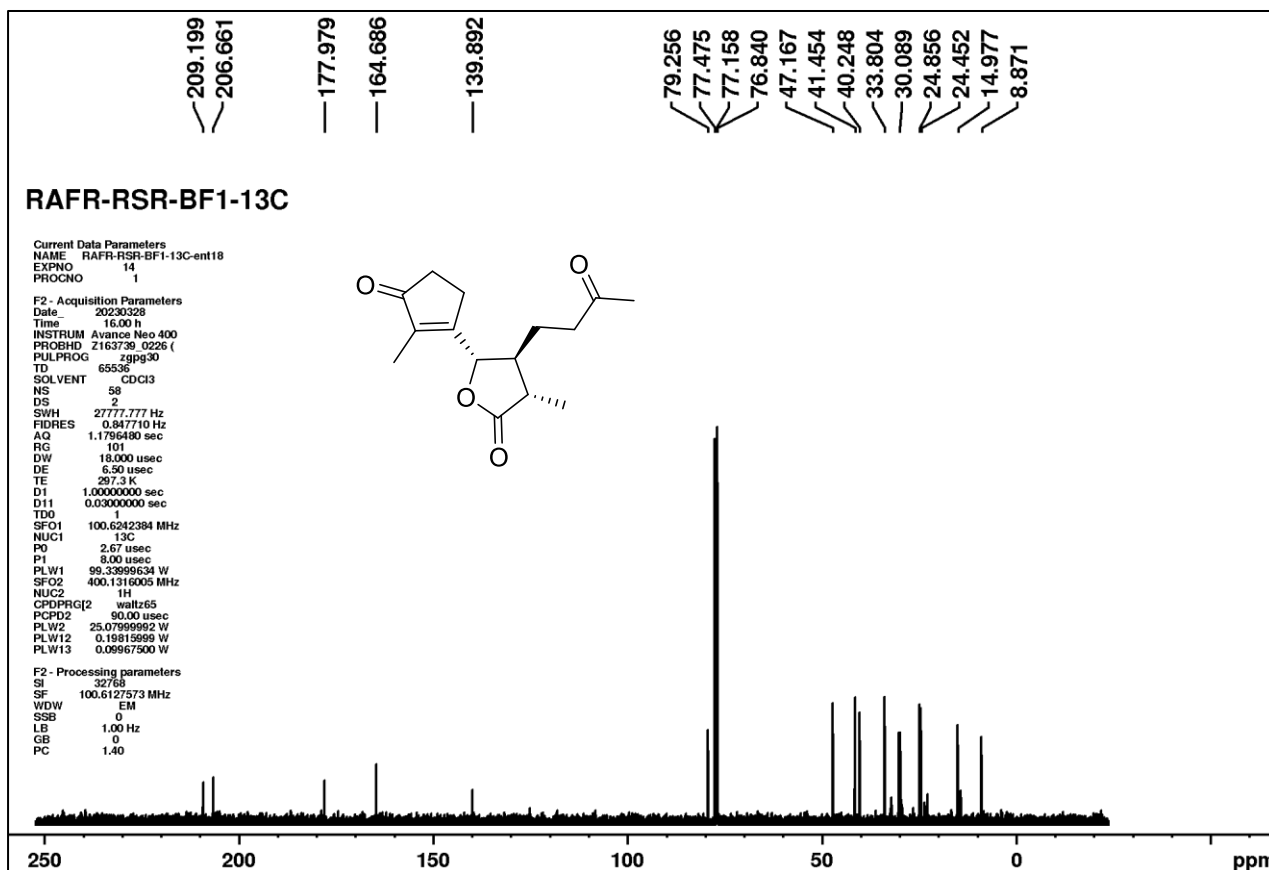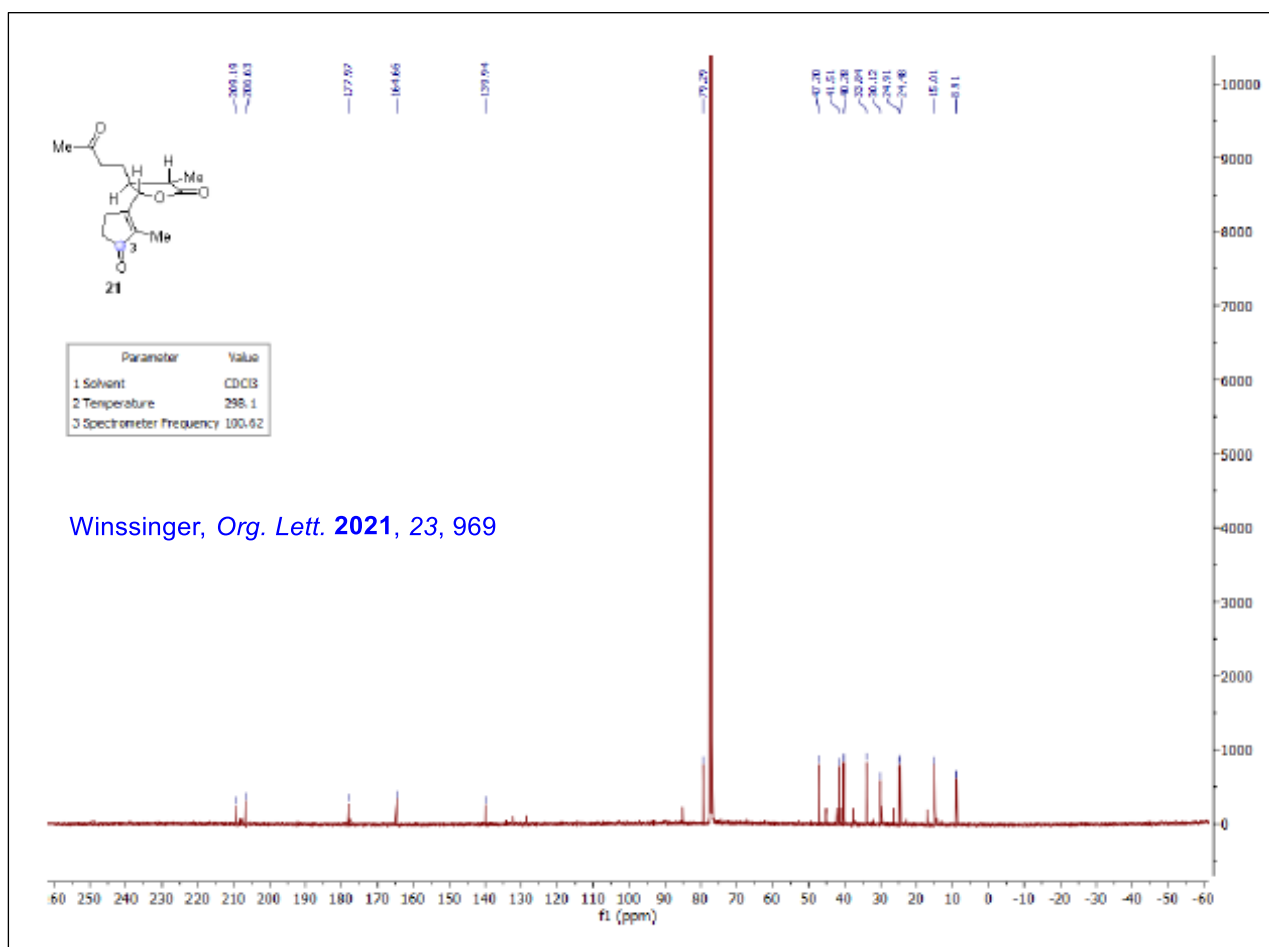



COSY (400 MHz, CDCl<sub>3</sub>) and NOESY (400 MHz, CDCl<sub>3</sub>) of compound *ent-18*

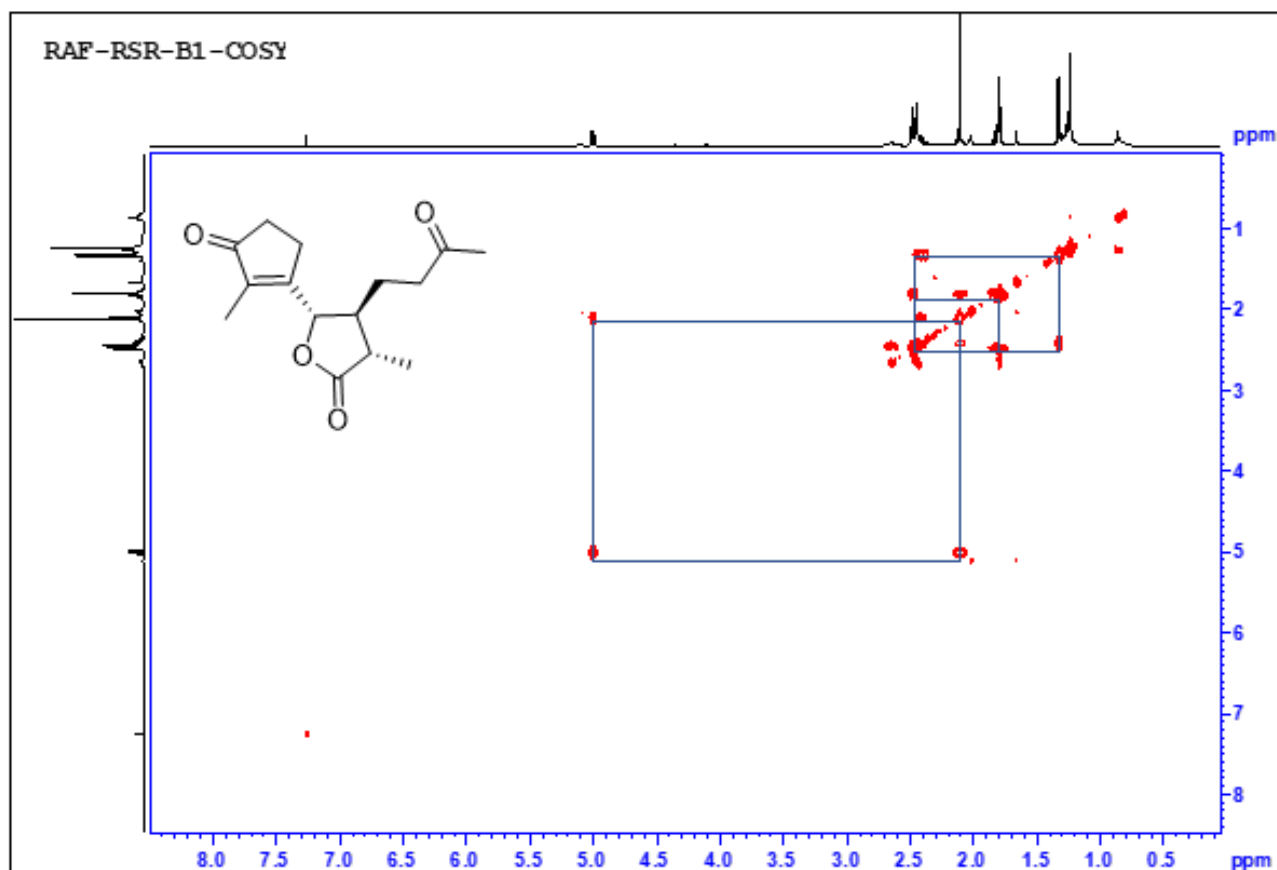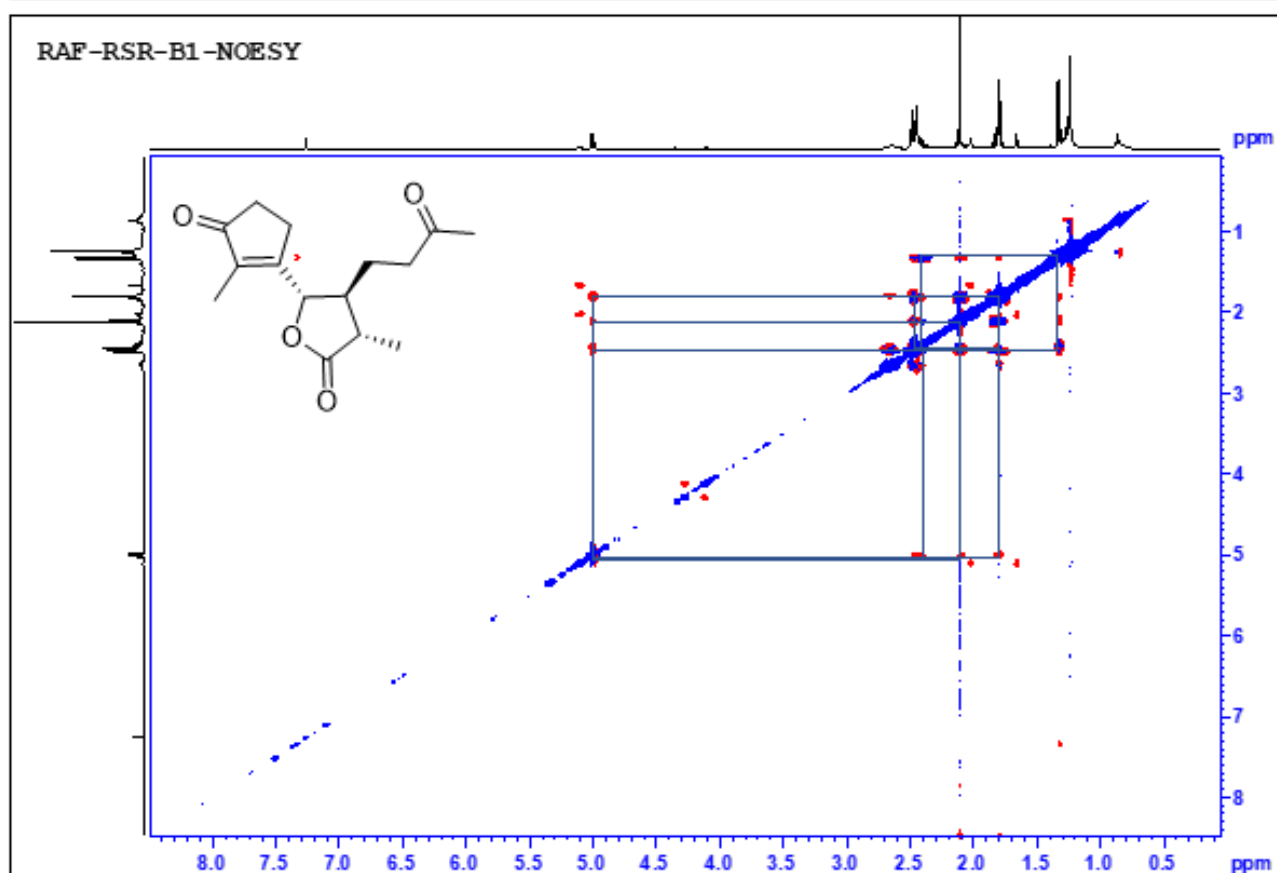

*ent*-**18**: HRMS (Q-TOF)  $m/z$ :  $[M + H]^+$  Calcd for  $C_{15}H_{21}O_4$  265.1435; Found 265.1430.

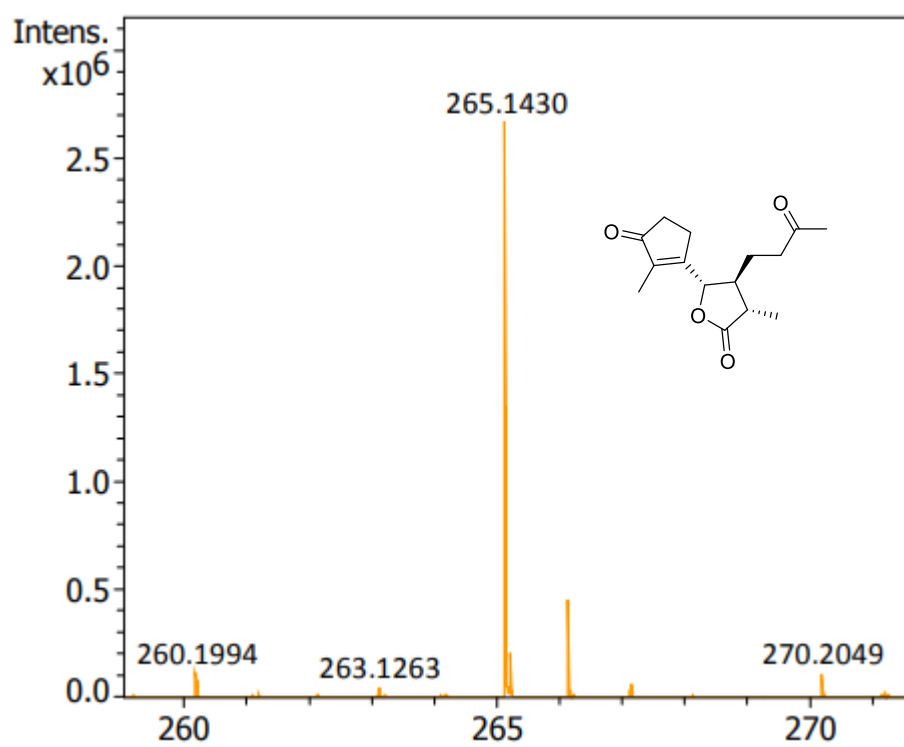

$^1\text{H}$  NMR (400 MHz,  $\text{CDCl}_3$ ) of compound **2b** and reported spectra of ( $\pm$ )-**2b**

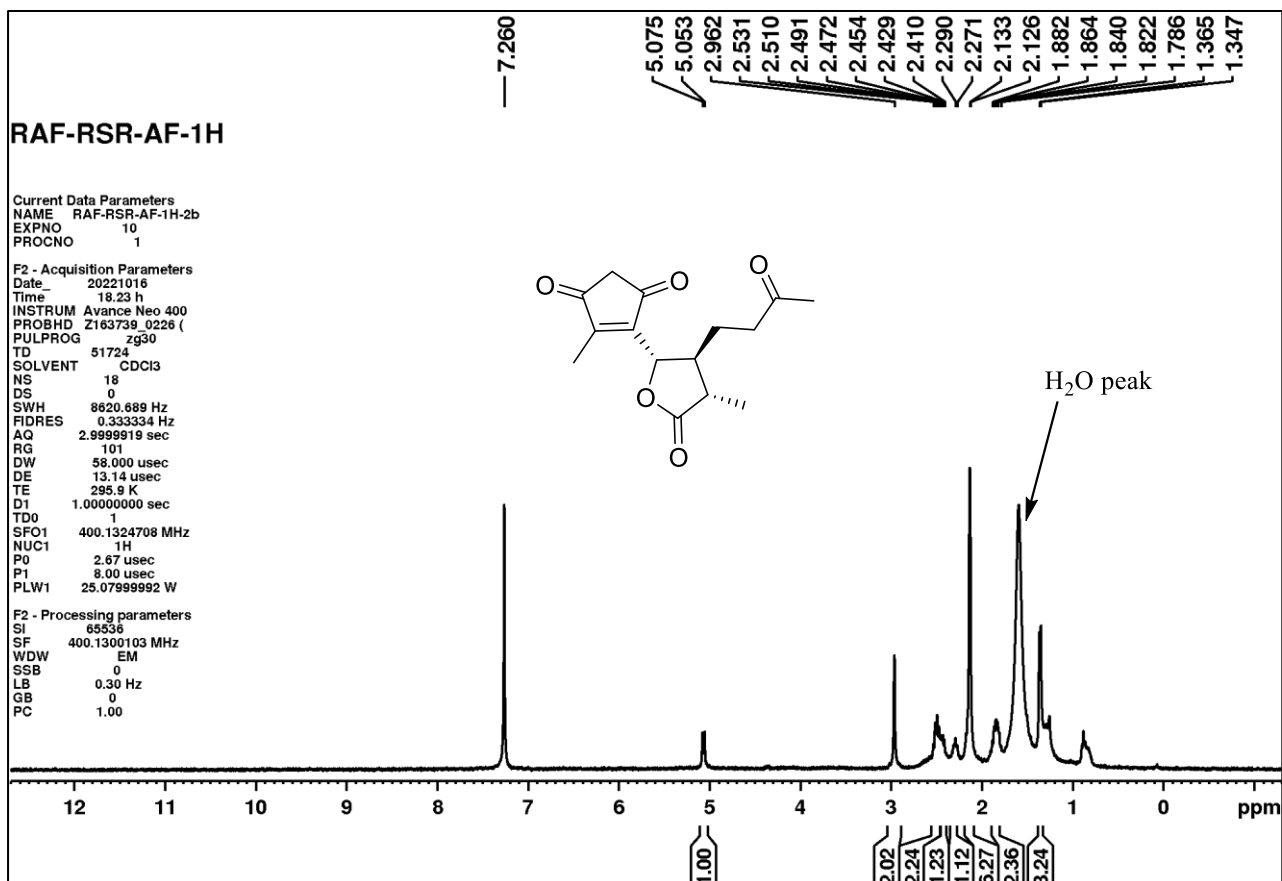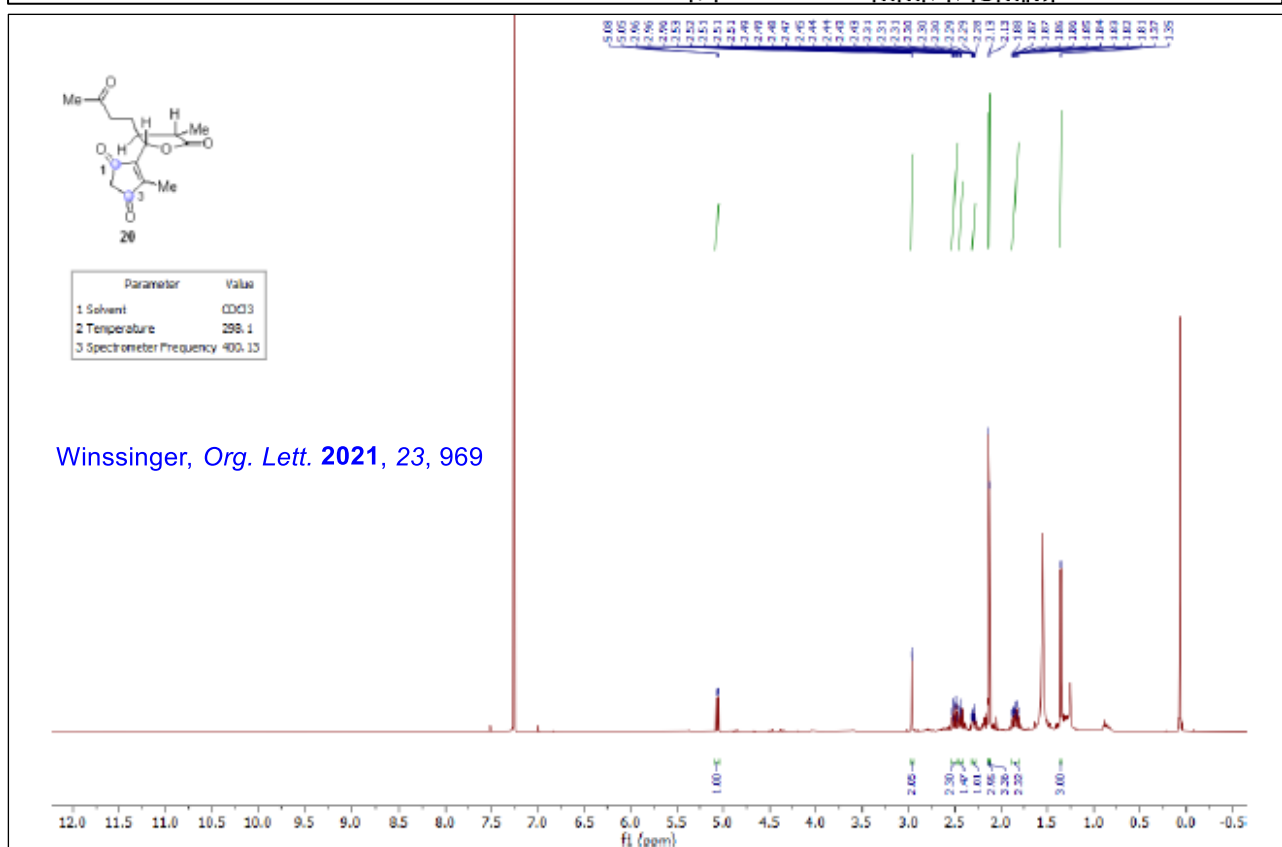

$^{13}\text{C}\{^1\text{H}\}$  NMR (125 MHz,  $\text{CDCl}_3$ ) of **2b** and reported spectra of ( $\pm$ )-**2b**

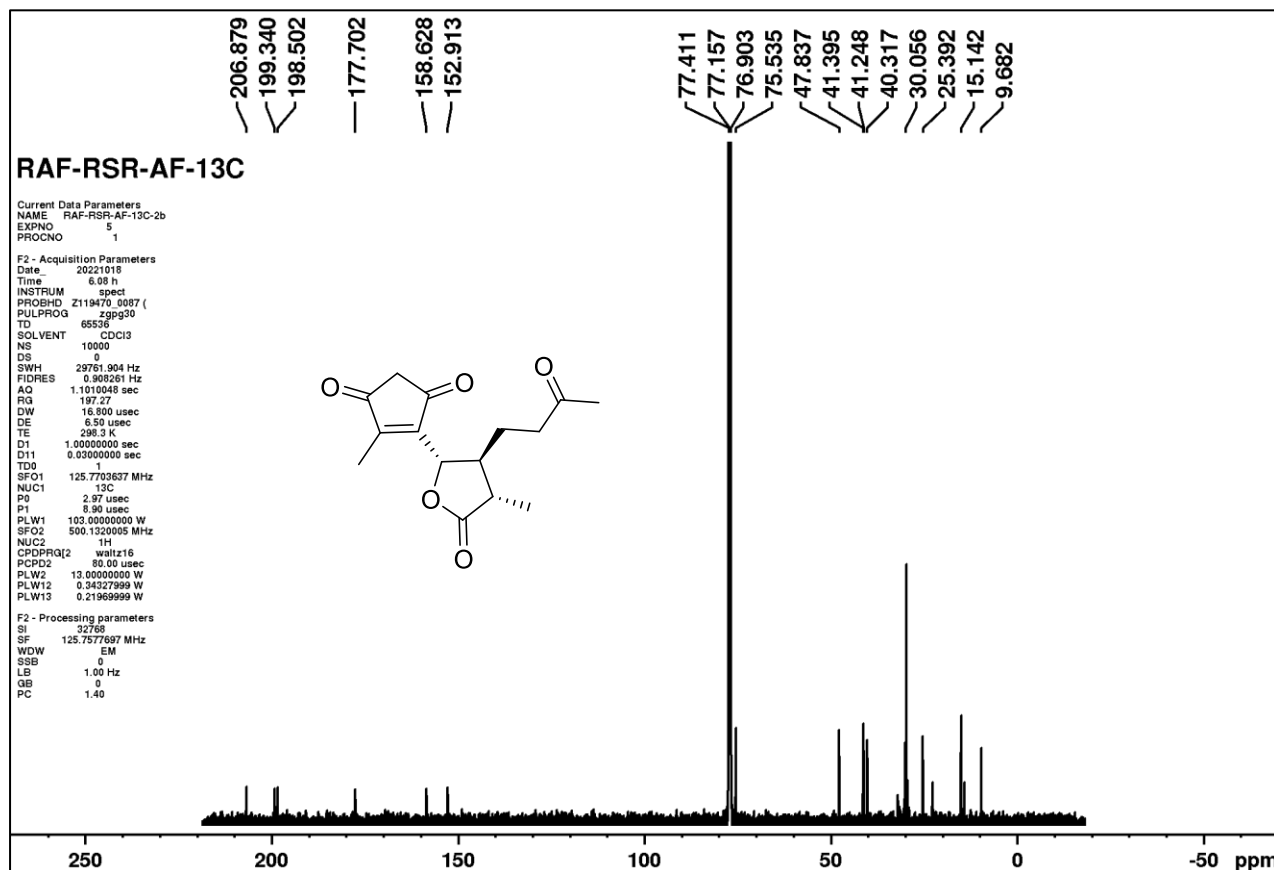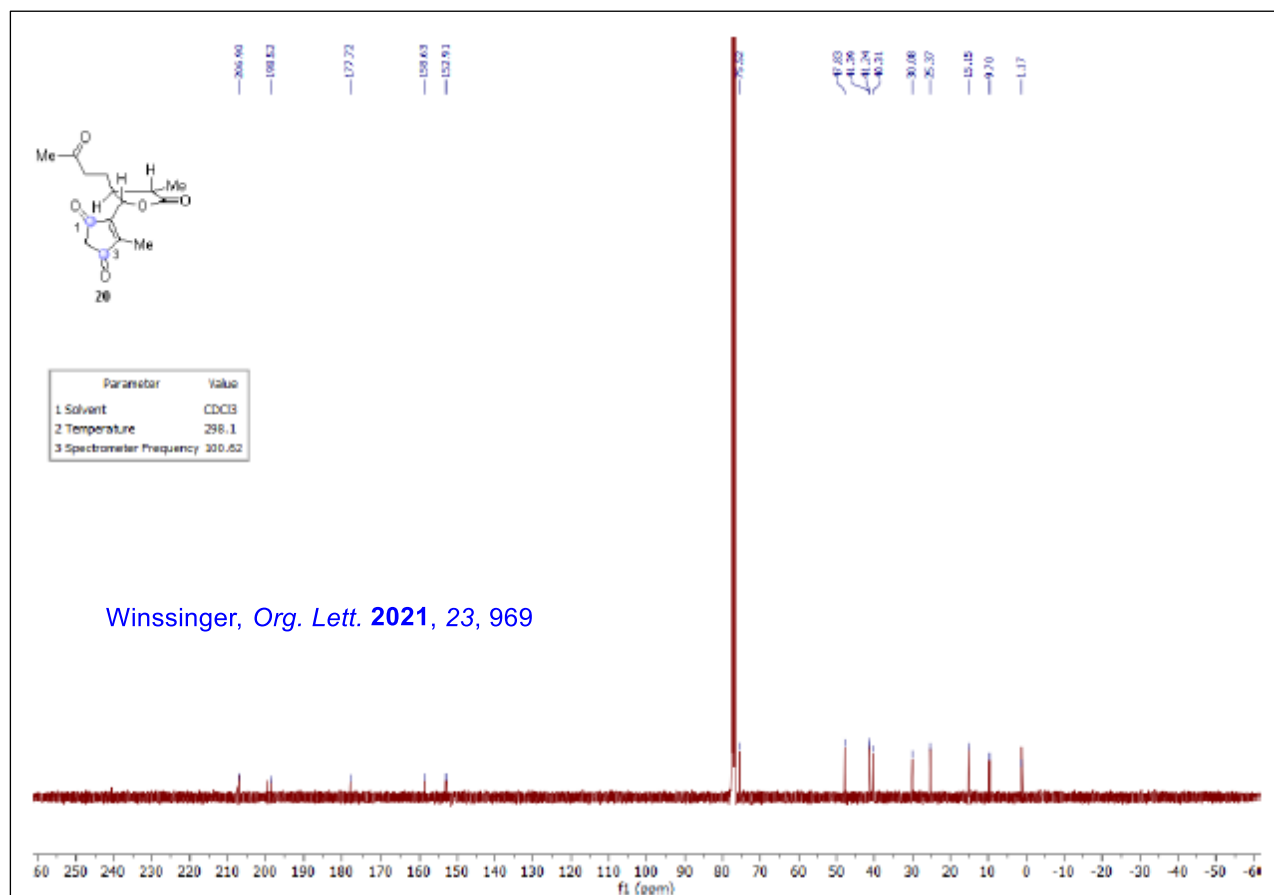

Winssinger, *Org. Lett.* **2021**, *23*, 969

**2b:** HRMS (Q-TOF)  $m/z$ :  $[M]^+$  Calcd for  $C_{15}H_{18}O_5$  278.1150; Found 278.1152.

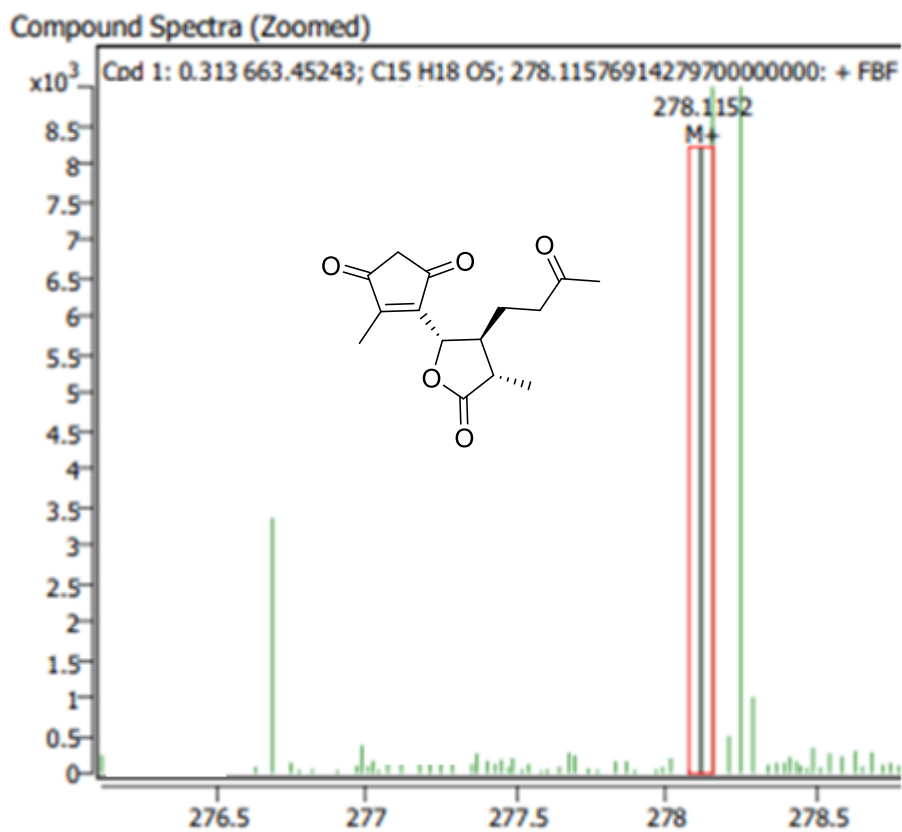

## X-Ray Data of 7h

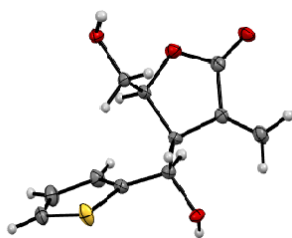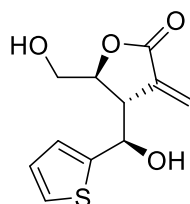

**Sample preparation:** A solution of compound **7h** (10 mg) in  $\text{CDCl}_3$  (0.5 mL) was placed in a vial (10 mL). The vial was closed with cap and kept at room temperature for 24 h. Then, colourless prisms were observed.

**Crystal measurement:** X-ray crystal structures were determined with a Bruker Single Crystal Kappa Apex II diffractometer. Thermal ellipsoids are drawn at 50% probability level.

**Table S1.** Crystallographic Information for Compound **7h**

|                                          |                                                                                          |
|------------------------------------------|------------------------------------------------------------------------------------------|
| <b>CCDC</b>                              | <b>2267170</b>                                                                           |
| Empirical formula                        | $\text{C}_{11}\text{H}_{12}\text{O}_4\text{S}$                                           |
| Formula weight                           | 240.27                                                                                   |
| Temperature/K                            | 150.00(10)                                                                               |
| Crystal system                           | orthorhombic                                                                             |
| Space group                              | $P2_12_12_1$                                                                             |
| a/&                                      | 8.5447(4)                                                                                |
| b/&                                      | 10.2606(5)                                                                               |
| c/&                                      | 12.5052(5)                                                                               |
| n/°                                      | 90                                                                                       |
| §/°                                      | 90                                                                                       |
| y/°                                      | 90                                                                                       |
| Volume/& <sup>3</sup>                    | 1096.38(9)                                                                               |
| Z                                        | 4                                                                                        |
| Pcalc C                                  | 1.456                                                                                    |
| Jt <sup>1</sup>                          | 0.290                                                                                    |
| F(000)                                   | 504.0                                                                                    |
| Crystal size/mm <sup>3</sup>             | 0.205 0.15 0.096                                                                         |
| Radiation                                | MoK $\alpha$ (X = 0.71073)                                                               |
| 2 $\theta$ - range for data collection/° | 5.136 to 66.826                                                                          |
| Index ranges                             | -12 $\bar{n}$ h $\bar{n}$ 13, -14 $\bar{n}$ k $\bar{n}$ 12, -19 $\bar{n}$ l $\bar{n}$ 14 |
| Reflections collected                    | 12004                                                                                    |
| Independent reflections                  | 3579 [R <sub>int</sub> ' 0.05509 R <sub>sigma</sub> ' 0.0616]                            |
| Data/restraints/parameters               | 3579/0/147                                                                               |
| Goodness-of-fit on F <sup>2</sup>        | 0.966                                                                                    |
| Final R indexes [I ≥ 2 $\sigma$ (I)]     | R <sub>i</sub> 0.0405, wR <sub>2</sub> ' 0.0874                                          |
| Final R indexes [all data]               | R <sub>i</sub> ' 0.0552, wR <sub>2</sub> ' 0.0998                                        |

|                                             |            |
|---------------------------------------------|------------|
| Largest diff. peak/hole / e Å <sup>-3</sup> | 0.27/-0.33 |
| Flack parameter                             | 0.06(5)    |

**Table S2.** Bond lengths for **7h**

| Atom Atom | Length/Å | Atom Atom | Length/ Å |
|-----------|----------|-----------|-----------|
| S1C8      | 1.727(2) | C3 C2     | 1.479(3)  |
| S1C11     | 1.712(2) | C8 C9     | 1.368(3)  |
| O3C6      | 1.432(3) | C4 C2     | 1.508(3)  |
| O2C3      | 1.355(3) | C4 C5     | 1.539(3)  |
| O2C5      | 1.462(2) | C2 C1     | 1.329(3)  |
| O4C7      | 1.438(2) | C5 C6     | 1.512(3)  |
| O1C3      | 1.209(3) | C9 C10    | 1.420(3)  |
| C7C8      | 1.499(3) | C11 C10   | 1.354 (3) |
| C7C4      | 1.542(3) |           |           |

**Table S3.** Bond Angles for **7h**

| Atom | Atom | Atom | Angle/°    | Atom | Atom | Atom | Angle/°    |
|------|------|------|------------|------|------|------|------------|
| C11  | S1   | C8   | 92.35(11)  | C2   | C4   | C5   | 102.15(17) |
| C3   | O2   | C5   | 110.66(16) | C5   | C4   | C7   | 112.49(17) |
| O4   | C7   | C8   | 111.97(17) | C3   | C2   | C4   | 107.35(18) |
| O4   | C7   | C4   | 106.33(16) | C1   | C2   | C3   | 122.0(2)   |
| C8   | C7   | C4   | 113.28(16) | C1   | C2   | C4   | 130.7(2)   |
| O2   | C3   | C2   | 109.66(18) | O2   | C5   | C4   | 106.31(15) |
| O1   | C3   | O2   | 121.1(2)   | O2   | C5   | C6   | 109.92(17) |
| O1   | C3   | C2   | 129.2(2)   | C6   | C5   | C4   | 112.06(17) |
| C7   | C8   | S1   | 122.21(16) | O3   | C6   | C5   | 109.07(17) |
| C9   | C8   | S1   | 110.38(16) | C8   | C9   | C10  | 112.9(2)   |
| C9   | C8   | C7   | 127.40(19) | C10  | C11  | S1   | 111.41(17) |
| C2   | C4   | C7   | 111.12(16) | C11  | C10  | C9   | 113.0(2)   |

## X-Ray Data of 8a

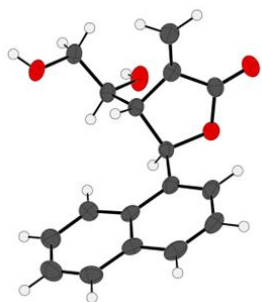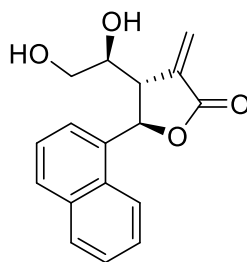

**Sample preparation:** A solution of compound **8a** (10 mg) in  $\text{CDCl}_3$  (0.5 mL) was placed in a vial (10 mL). The vial was closed with cap and kept at room temperature for 24 h. Then, colourless prisms were observed.

**Crystal measurement:** X-ray crystal structures were determined with a Bruker Single Crystal Kappa Apex II diffractometer. Thermal ellipsoids are drawn at 50% probability level.

**Table S4.** Crystallographic Information for Compound **8a**

|                                                |                                                               |
|------------------------------------------------|---------------------------------------------------------------|
| <b>CCDC</b>                                    | <b>2270886</b>                                                |
| Empirical formula                              | $\text{C}_{17}\text{H}_{16}\text{O}_4$                        |
| Formula weight                                 | 284.30                                                        |
| Temperature/K                                  | 150.00(10)                                                    |
| Crystal system                                 | monoclinic                                                    |
| Space group                                    | $P2_1$                                                        |
| a/Å                                            | 5.1299(4)                                                     |
| b/Å                                            | 14.7848(10)                                                   |
| c/Å                                            | 9.1241(6)                                                     |
| $\alpha/^\circ$                                | 90                                                            |
| $\beta/^\circ$                                 | 90.366(7)                                                     |
| $\gamma/^\circ$                                | 90                                                            |
| Volume/Å <sup>3</sup>                          | 692.00(8)                                                     |
| Z                                              | 2                                                             |
| $\rho_{\text{calc}}/\text{g}/\text{cm}^3$      | 1.364                                                         |
| $\mu/\text{mm}^{-1}$                           | 0.097                                                         |
| F(000)                                         | 300.0                                                         |
| Crystal size/mm <sup>3</sup>                   | 0.16 × 0.15 × 0.11                                            |
| Radiation                                      | $\text{MoK}\alpha$ ( $\lambda = 0.71073$ )                    |
| 2 $\theta$ range for data collection/ $^\circ$ | 5.246 to 49.978                                               |
| Index ranges                                   | $-6 \leq h \leq 6, -17 \leq k \leq 17, -10 \leq l \leq 10$    |
| Reflections collected                          | 7550                                                          |
| Independent reflections                        | 2381 [ $R_{\text{int}} = 0.0684, R_{\text{sigma}} = 0.0611$ ] |
| Data/restraints/parameters                     | 2381/1/192                                                    |
| Goodness-of-fit on $F^2$                       | 1.054                                                         |
| Final R indexes [ $I \geq 2\sigma(I)$ ]        | $R_1 = 0.0436, wR_2 = 0.1038$                                 |
| Final R indexes [all data]                     | $R_1 = 0.0482, wR_2 = 0.1073$                                 |
| Largest diff. peak/hole / $e \text{ \AA}^{-3}$ | 0.21/-0.17                                                    |
| Flack parameter                                | 0.6(10)                                                       |



**Table S5.** Bond lengths for **8a**

| Atom | Atom | Length/Å | Atom | Atom | Length/Å |
|------|------|----------|------|------|----------|
| O001 | C00A | 1.433(4) | C009 | C00B | 1.553(5) |
| O002 | C008 | 1.341(4) | C009 | C00H | 1.493(5) |
| O002 | C00B | 1.462(4) | C00C | C00G | 1.432(5) |
| O003 | C005 | 1.429(4) | C00C | C00I | 1.417(6) |
| O004 | C008 | 1.216(4) | C00C | C00L | 1.420(6) |
| C005 | C009 | 1.531(5) | C00D | C00H | 1.326(5) |
| C005 | C00A | 1.522(5) | C00E | C00F | 1.376(5) |
| C006 | C007 | 1.365(5) | C00E | C00K | 1.412(6) |
| C006 | C00B | 1.514(5) | C00F | C00G | 1.415(5) |
| C006 | C00G | 1.435(5) | C00I | C00K | 1.353(6) |
| C007 | C00J | 1.422(5) | C00J | C00L | 1.352(6) |
| C008 | C00H | 1.481(5) |      |      |          |

**Table S6.** Bond Angles for **8a**

| Atom | Atom | Atom | Angle/°  | Atom | Atom | Atom | Angle/°  |
|------|------|------|----------|------|------|------|----------|
| C008 | O002 | C00B | 110.8(3) | C006 | C00B | C009 | 113.4(3) |
| O003 | C005 | C009 | 106.1(3) | C00I | C00C | C00G | 119.0(4) |
| O003 | C005 | C00A | 109.3(3) | C00I | C00C | C00L | 122.0(4) |
| C00A | C005 | C009 | 114.5(3) | C00L | C00C | C00G | 119.0(4) |
| C007 | C006 | C00B | 122.2(3) | C00F | C00E | C00K | 120.3(4) |
| C007 | C006 | C00G | 119.5(3) | C00E | C00F | C00G | 121.3(3) |
| C00G | C006 | C00B | 118.2(3) | C00C | C00G | C006 | 119.1(3) |
| C006 | C007 | C00J | 121.0(4) | C00F | C00G | C006 | 123.0(3) |
| O002 | C008 | C00H | 109.7(3) | C00F | C00G | C00C | 117.9(3) |
| O004 | C008 | O002 | 120.5(3) | C008 | C00H | C009 | 107.0(3) |
| O004 | C008 | C00H | 129.8(3) | C00D | C00H | C008 | 122.6(3) |
| C005 | C009 | C00B | 111.2(3) | C00D | C00H | C009 | 130.3(3) |
| C00H | C009 | C005 | 111.9(3) | C00K | C00I | C00C | 121.6(4) |
| C00H | C009 | C00B | 101.5(3) | C00L | C00J | C007 | 120.8(4) |
| O001 | C00A | C005 | 109.0(3) | C00I | C00K | C00E | 119.9(4) |
| O002 | C00B | C006 | 110.3(3) | C00J | C00L | C00C | 120.6(4) |
| O002 | C00B | C009 | 105.5(2) |      |      |      |          |

## X-Ray Data of 12

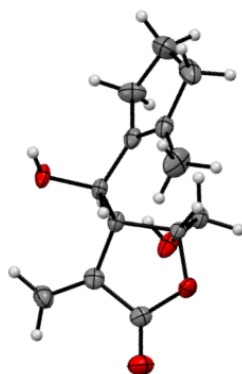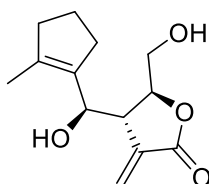

**Sample preparation:** A solution of compound **12** (20 mg) in the mixture of petroleum ether and CH<sub>2</sub>Cl<sub>2</sub> (5:1) was placed in a vial (10 mL). The vial was closed with cap and kept at room temperature for 24 h. Then, colourless prisms were observed.

**Crystal measurement:** X-ray crystal structures were determined with a Bruker Single Crystal Kappa Apex II diffractometer. Thermal ellipsoids are drawn at 50% probability level.

**Table S7.** Crystallographic Information for Compound **12**

|                                   |                                                               |
|-----------------------------------|---------------------------------------------------------------|
| <b>CCDC</b>                       | <b>2235974</b>                                                |
| Empirical formula                 | C <sub>13</sub> H <sub>18</sub> O <sub>4</sub>                |
| Formula weight                    | 238.285                                                       |
| Temperature/K                     | 150.15                                                        |
| Crystal system                    | monoclinic                                                    |
| Space group                       | P2 <sub>1</sub>                                               |
| a/&                               | 7.5355(3)                                                     |
| b/&                               | 7.5626(2)                                                     |
| c/&                               | 11.2958(3)                                                    |
| n/°                               | 90                                                            |
| §/°                               | 103.257(3)                                                    |
| y/°                               | 90                                                            |
| Volume/& <sup>3</sup>             | 626.57(4)                                                     |
| Z                                 | 2                                                             |
| Pcalc <sup>c</sup>                | 1.263                                                         |
| Jt <sup>1</sup>                   | 0.093                                                         |
| F(000)                            | 256.2                                                         |
| Crystal size/mm <sup>3</sup>      | 0.2 • 0.106 0.089                                             |
| Radiation                         | Mo Ko (Z = 0.71073)                                           |
| 2θ- range for data collection/°   | 3.7 to 49.98                                                  |
| Index ranges                      | -11 ñ h ñ 10, -12 S k ñ 11, -18 ñ l ñ 17                      |
| Reflections collected             | 17844                                                         |
| Independent reflections           | 2191 [R <sub>int</sub> ' 0•14879 R <sub>sigma</sub> ' 0•0978] |
| Data/restraints/parameters        | 2191/1/157                                                    |
| Goodness-of-fit on F <sup>2</sup> | 1.048                                                         |
| Final R indexes [I >= 2σ(I)]      | R <sub>i</sub> 0.0493, wR <sub>2</sub> ' 0.1294               |
| Final R indexes [all data]        | R <sub>i</sub> ' 0.0525, wR <sub>2</sub> ' 0.1341             |

|                                             |            |
|---------------------------------------------|------------|
| Largest diff. peak/hole / e Å <sup>-3</sup> | 0.21/-0.23 |
| Flack parameter                             | 0.3(9)     |

**Table S8.** Bond lengths for **12**

| Atom Atom | Length/Å | Atom Atom | Length/Å |
|-----------|----------|-----------|----------|
| O001 COOC | 1.434(3) | C007 C009 | 1.321(3) |
| O002C00D  | 1.447(3) | C008 C00D | 1.539(3) |
| O003C005  | 1.451(3) | COOACO0B  | 1.336(3) |
| O003 C006 | 1.347(3) | COOACO0D  | 1.493(3) |
| O004C006  | 1.203(3) | COOACO0E  | 1.5064)  |
| C001C008  | 1.544(3) | CO0BCO0F  | 1.4974)  |
| C005 COOC | 1.504(3) | CO0BCO0G  | 1.5004)  |
| C006 C007 | 1.487(3) | CO0ECO0H  | 1.5254)  |
| C007 C008 | 1.498(3) | CO0GCO0H  | 1.5235)  |

**Table S9.** Bond Angles for **12**

| Atom | Atom | Atom | Angle/°     | Atom | Atom | Atom | Angle/°     |
|------|------|------|-------------|------|------|------|-------------|
| C006 | O003 | C005 | 111.52 (17) | C00D | C00A | C00B | 126.8 (2)   |
| C008 | C005 | O003 | 106.25 (17) | C00E | C00A | C00B | 111.9 (2)   |
| C00C | C005 | O003 | 108.97 (18) | C00E | C00A | C00D | 121.3 (2)   |
| C00C | C005 | C008 | 113.35 (17) | C00F | C00B | C00A | 127.9 (2)   |
| O004 | C006 | C003 | 121.5 (2)   | C00G | C00B | C00A | 111.7 (2)   |
| C007 | C006 | C003 | 109.5 (2)   | C00G | C00B | C00F | 120.4 (2)   |
| C007 | C006 | C004 | 129.0 (2)   | C005 | C00C | C001 | 111.11 (18) |
| C008 | C007 | C006 | 107.58 (19) | C008 | C00D | C002 | 104.85 (15) |
| C009 | C007 | C006 | 121.4 (2)   | C00A | C00D | C002 | 111.11 (18) |
| C009 | C007 | C008 | 131.0 (2)   | C00A | C00D | C008 | 114.01 (19) |
| C007 | C008 | C005 | 103.00 (18) | C00H | C00E | C00A | 104.1 (2)   |
| C00D | C008 | C005 | 113.67 (17) | C00H | C00G | C00B | 104.6 (2)   |
| C00D | C008 | C007 | 113.14 (18) | C00G | C00H | C00E | 107.1 (2)   |
